# Supplementary material for: Dynamic Changes in Genome-Wide Histone3 Lysine27 Trimethylation and Gene Expression of Soybean Roots in Response to Salt Stress
Source: PubMed Central journal article supplement (PMC6746917; doi:10.3389/fpls.2019.01031), 2019-09-10
Supplement: Datasheet_1.pdf [file Datasheet_1.pdf]

## Supplementary data

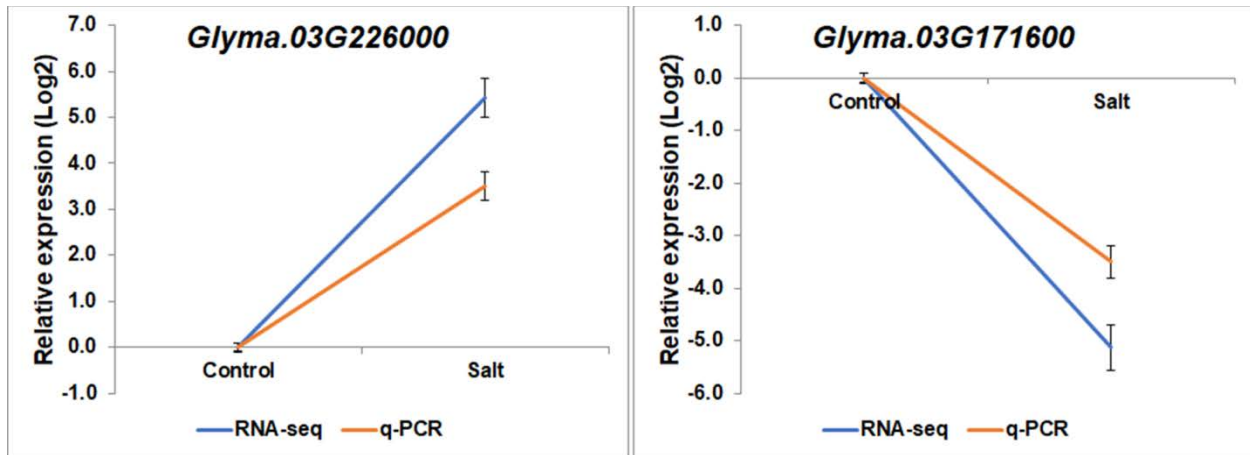

**Supplementary Figure 1.** The gene expression profile of two known soybean salt stress genes analyzed by RNA-seq and q-PCR. Graphs show the relative expression levels of two known soybean salt genes, (*Glyma. 03G226000* and *Glyma. 03G171600*), analyzed by RNA-seq and by qPCR which normalized to a *Tubulin* (*Glyma.05G203800*) reference gene. Error bars represent standard deviation (SD).

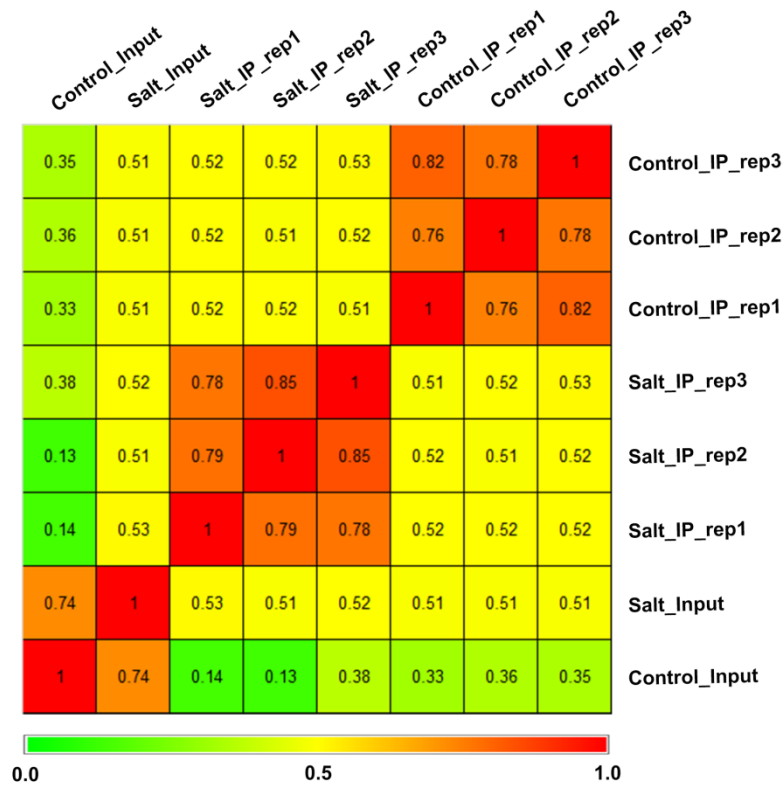

**Supplementary Figure 2.** The correlation coefficient of biological replicates of ChIP-seq data. Verification of ChIP-seq results using Pearson correlation analysis showed high correlation coefficients between the biological replicates for each sample in soybean.

### A. Peak distribution

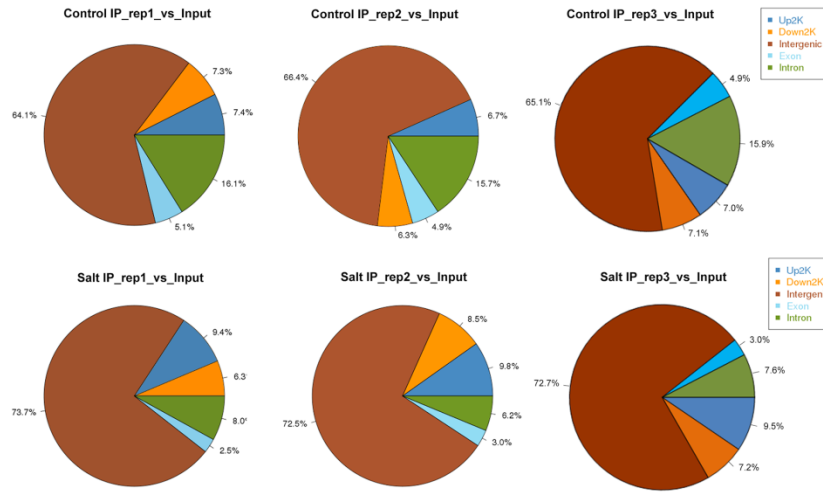

### B. Data summary

| Samples | Peak #           | Average number | Total length | Average length | Total depth | Annotated gene covered with peaks | Overlapped genes |
|---------|------------------|----------------|--------------|----------------|-------------|-----------------------------------|------------------|
| Control | IP_rep1_vs_Input | 2574           | 1807045      | 702.04         | 24344548    | 1707                              | 2357             |
|         | IP_rep2_vs_Input | 3410           | 2597346      | 761.69         | 49161117    |                                   |                  |
|         | IP_rep3_vs_Input | 2986           | 2197367      | 735.89         | 37865539    |                                   |                  |
| Salt    | IP_rep1_vs_Input | 1262           | 901367       | 714.24         | 15439126    | 746                               |                  |
|         | IP_rep2_vs_Input | 1635           | 1148771      | 702.61         | 17422797    |                                   |                  |
|         | IP_rep3_vs_Input | 1458           | 1036404      | 710.84         | 16578646    |                                   |                  |

**Supplementary Figure 3. ChIP-seq data characteristics. (A)** Peak distribution of ChIP-seq analysis with the following genomic regions: promoter (Up2K, 2 kb upstream of the TSS), downstream (Down2K, 2 kb downstream of the TES), intergenic, exon and intron regions. **(B)** Summary of ChIP-seq data. The number of total genes with H3K27me3 marks in control and/or salt plants is 2357.

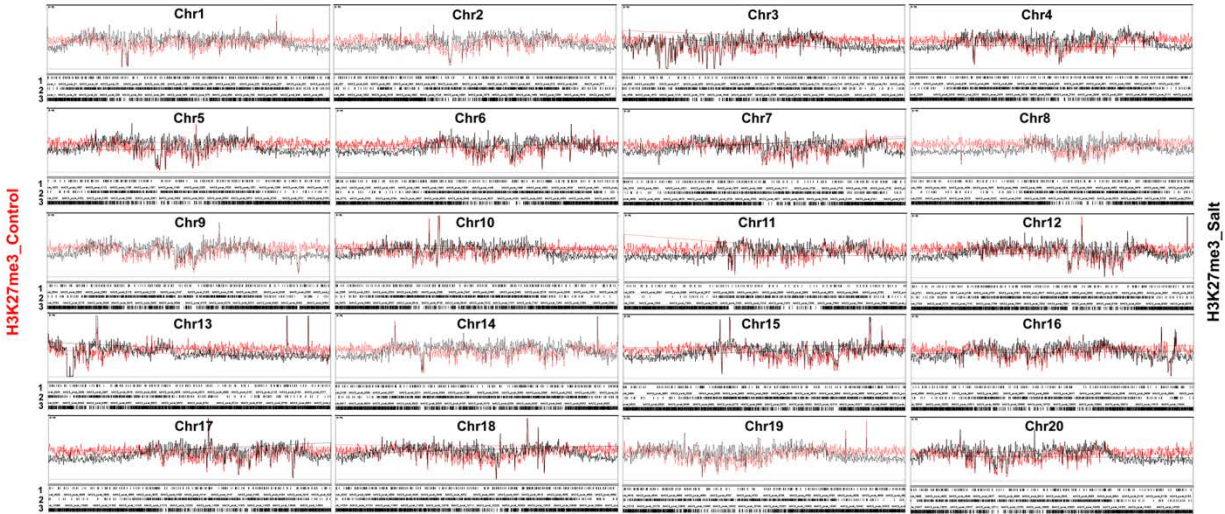

**Supplementary Figure 4.** Chromosomal distribution of H3K27me3 modification sites on all 20 soybean chromosomes. Y-axis represents the input signals for the immunoprecipitation of H3K27me3 in control on the left side (H3K27me3\_Control) and salt-treated soybean on the right side (H3K27me3\_Salt). The comparison of H3K27me3 marked in control (red) and salt (black) plants were shown on all chromosomes. Chr and 5mb represent chromosome and 5 megabase, respectively. 1 and 2 indicate MACS peaks identified for control (1) and salt (2) samples using MACS with the default  $10^{-5}$  p-value cutoff with each input as a control for significant peak calling.

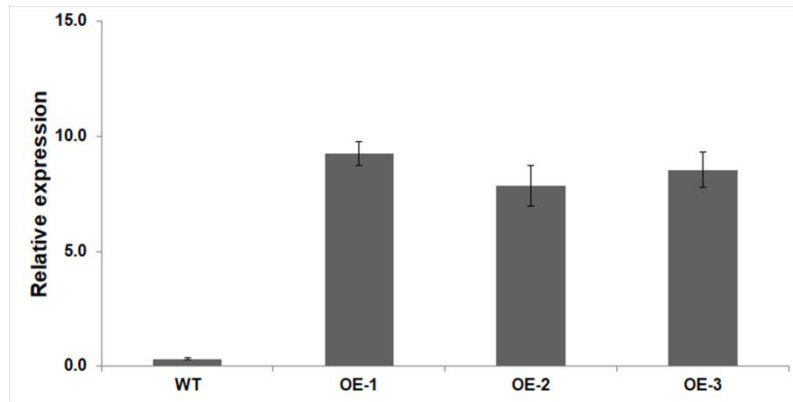

**Supplementary Figure 5.** Expression analysis of *Glyma.17g022500* in transgenic *Arabidopsis*. mRNA expression levels of *Glyma.17g022500* in WT, transgenic *Arabidopsis* OE-1, OE-2, OE-3 plants. Graphs show the relative expression levels measured by qPCR, normalized to a *UBIQUITIN (UBQ)* reference gene. Error bars represent standard deviation (SD).

**Supplementary Table 1.** List of primer sequences used in the experiments.

| Gene            | Sequence                   |                           | Purpose                |
|-----------------|----------------------------|---------------------------|------------------------|
|                 | Forward                    | Reverse                   |                        |
| Glyma.01G188000 | CGCGAATAAAGTGGAGGGTTCA     | GCAGTTCCTTCTCTCCGTTGACAT  | For qPCR               |
| Glyma.01G204900 | GTGGGTTGTGGTTCAACTAATGGT   | CCACTGTCAGTTGTTTGACCAAGA  | For qPCR               |
| Glyma.04G131800 | CCAGAAACCCTACATCTTCGACAT   | GGACCTTTTCATCGTATTTCGAGG  | For qPCR               |
| Glyma.04G187000 | TGGCGAGAGGGGAGAGAGC        | GCGGTGAGGCTTCATCGG        | For qPCR               |
| Glyma.04G192000 | CGAGGTTTTGGCATGGCTGAAA     | AAGGTGGGAAGGGAGGGATGATTT  | For qPCR               |
| Glyma.05G203800 | ATGGCTTCGAGCATCCAACA       | TGACAGAGGTGCCGATTTT       | For qPCR and ChIP-qPCR |
| Glyma.07G110300 | GAATCAGCGGAAGAACAACA       | GAAGGTTTGGTGGCAATGTT      | For qPCR and ChIP-qPCR |
| Glyma.08G070700 | AGCTTATGATGGCTCACAACAAGG   | CACAAATTCTCCCATGTCCCTGT   | For qPCR               |
| Glyma.08G127000 | GTGAATGAGGAGATAGGGATTGGG   | CCACCTCCTTGAACCGAACAAT    | For qPCR               |
| Glyma.09G041000 | ATTGCTCTTGCTGGTGGCATT      | CTGGAAGCAATGGTGTGAGTG     | For qPCR and ChIP-qPCR |
| Glyma.10G029800 | CCGAAGATATGAAGAGCTTCCAAC   | CGGGTGCAGATTGAGATACCATA   | For qPCR               |
| Glyma.11G204800 | ACCTTGTTGATGTTGTGGTCATGG   | GGTCTGCCAAACTTGCCTTTAGAT  | For qPCR               |
| Glyma.12G104800 | GAGAACCCCATCTTGTGACAAAAG   | CCCTCTTTTGACATTTGGCCTT    | For qPCR               |
| Glyma.13G043800 | CCCTTCTCTCATCTAATTCTGCTGC  | CAACTCAAGCACGTACCCTTCTCTT | For qPCR               |
| Glyma.14G176700 | TTCTGGAAATTTTGCTGTGGCC     | GGGGTGTTCATGATCTGTGGTT    | For qPCR               |
| Glyma.14G213600 | ATGGCGAAAAGGAGCATGTGT      | TTATAAGCCGAGTACGTGCTGA    | For qPCR               |
| Glyma.19G124100 | TGGAACACCATTTTGGTCAAGG     | AGAAACACACACAAAAGGGGCA    | For qPCR               |
| Glyma.20G168900 | CCAATACAACCAGTTGCTCAGATG   | ACATGCATTGTCAGGGTCATCA    | For qPCR               |
| Glyma.20G181000 | GGTAGTGTTGAAATCCCAATTGG    | GGTTTGGGCAACGGTGGTATAAT   | For qPCR               |
| Glyma.20G235300 | GGTGCAAAAGGTCCGATGGTAA     | ACGACAGTGAATGCGACTTCTCT   | For qPCR               |
| Glyma.04G131800 | TTAAGTGCAGTCTAACTTCGAGG    | AAGCTGCATCAGCCGCATTT      | For ChIP-qPCR          |
| Glyma.04G187000 | AGTGGTCTTTAAGCTCCAG        | GAGTTTGAGGATGGTGAAC       | For ChIP-qPCR          |
| Glyma.13G043800 | GGTTAATTAGCTCACCTCAGAG     | CCAAGCCCTTGAGTCTTAA       | For ChIP-qPCR          |
| Glyma.14G213600 | ACTATGGTTCGTTGCTTTTGTCTTTG | TGCAACACACGAACCACAATTACA  | For ChIP-qPCR          |
| Glyma.17g022500 | ATGACCTCTGATCATGCTTCCG     | AGACCAATGAGAAGGGCAGTGA    | For ChIP-qPCR and qPCR |
|                 | ATGGCTGTGGAAGCATTGTA       | TTAAGTGAATGCCACTG         | For full length cDNA   |
| UBQ             | ATGCAGATTTTCGTGAAAACGC     | CAAAGTCGACTCTTCTGGATG     | For qPCR               |

**Supplementary Table 2.** Summary of RNA-seq data.

| Sample       | Total reads | Quality filtered reads | Uniquely mapped reads | Mapped rate (%) | Correlation coefficient (R)      |
|--------------|-------------|------------------------|-----------------------|-----------------|----------------------------------|
| Control_rep1 | 46226862    | 44201228               | 42720846              | 96.65           | 1&2=0.85<br>1&3=0.89<br>2&3=0.86 |
| Control_rep2 | 51265272    | 49134852               | 47431628              | 96.53           |                                  |
| Control_rep3 | 50384960    | 48234122               | 46590396              | 96.59           |                                  |

|           |          |          |          |       |                                  |
|-----------|----------|----------|----------|-------|----------------------------------|
| Salt_rep1 | 42673942 | 40656396 | 36244302 | 89.15 | 1&2=0.79<br>1&3=0.83<br>2&3=0.85 |
| Salt_rep2 | 54498130 | 50711174 | 48159942 | 94.97 |                                  |
| Salt_rep3 | 51367822 | 48368815 | 44527591 | 92.06 |                                  |

**Supplementary Table 3.** Expression profile of control and salt-treated soybean analyzed by RNA-seq (See excel file).

**Supplementary Table 4.** Summary of ChIP-seq data.

| Sample Name | Total Reads | Mapped Reads | Mapped Rate (%) | UniqReads |          |
|-------------|-------------|--------------|-----------------|-----------|----------|
| Control     | IP_rep1     | 32309878     | 24359067        | 75.39     | 11323797 |
|             | IP_rep2     | 52498286     | 39650520        | 75.53     | 18464272 |
|             | IP_rep3     | 53376582     | 41014566        | 76.84     | 19082956 |
| Salt        | IP_rep1     | 50123780     | 39909225        | 79.62     | 16346722 |
|             | IP_rep2     | 50123476     | 39762243        | 79.33     | 16478284 |
|             | IP_rep3     | 51702528     | 41692918        | 80.64     | 17177857 |

**Supplementary Table 5.** The list of genes with H3K27me3 modification in control soybean plants (See excel file).

**Supplementary Table 6.** The list of genes with *de novo* H3K27me3 modification in salt-treated soybean plants (See excel file).
