# Supplementary material for: Dynamic Changes in Genome-Wide Histone3 Lysine27 Trimethylation and Gene Expression of Soybean Roots in Response to Salt Stress
Source: Front Plant Sci. 2019 Sep 10;10:1031. doi: 10.3389/fpls.2019.01031 (PMC6746917; doi:10.3389/fpls.2019.01031)
Supplement: Supplementary file 1 [file Table_1.xlsx]

## Sheet: Sheet1
Supplementary Table 3. Expression profile of control and salt-treated soybean analyzed by RNA-seq
Gene	baseMean	Log2 (fold change)	p-value	p-adj	Control_1	Control_2	Control_3	Salt_1	Salt_2	Salt_3
Glyma.17G224900.Wm82.a2.v1	23852.1	8.56558	7.17451e-53	2.56482e-48	137.307	113.887	115.333	43808.7	13502	51348.5
Glyma.05G022200.Wm82.a2.v1	175629	8.39051	1.01052e-48	1.80625e-44	1045.82	1041.4	950.333	413913	97660	286516
Glyma.14G099900.Wm82.a2.v1	19999.5	8.43862	6.97212e-48	8.30821e-44	114.995	114.913	117	32336	11358	47432
Glyma.16G206200.Wm82.a2.v1	4837.11	8.79741	1.66948e-46	1.49206e-42	17.1634	26.1632	21.6667	10683.2	2640.5	8621.9
Glyma.13G175700.Wm82.a2.v1	48679.2	7.72224	3.37216e-46	2.41102e-42	461.695	456.06	429	94083.5	27418	99715.5
Glyma.12G013100.Wm82.a2.v1	108716	7.72423	1.3217e-45	7.87489e-42	1052.11	994.713	978.333	201479	62074.5	231338
Glyma.04G054400.Wm82.a2.v1	22581.6	7.5847	2.28283e-44	1.16584e-40	235.71	232.39	206	46004.5	12728.5	43854
Glyma.07G200700.Wm82.a2.v1	26658.3	8.06556	2.82522e-44	1.26249e-40	203.672	192.889	183.667	63095	15009	43141.6
Glyma.07G061500.Wm82.a2.v1	27420.9	8.08247	3.79306e-44	1.50665e-40	197.951	205.201	189	65296.3	16155	43984
Glyma.08G068700.Wm82.a2.v1	18831	7.57234	1.23104e-43	4.40084e-40	200.811	192.889	185.333	39584.3	10958	35346.1
Glyma.16G030000.Wm82.a2.v1	14638.2	7.43582	2.09204e-42	6.79894e-39	165.913	170.317	154.333	28245.6	8823	29970.9
Glyma.07G200500.Wm82.a2.v1	7947.65	7.6893	2.29618e-42	6.8405e-39	68.0813	85.1585	86	15047.2	4506	16590.2
Glyma.01G238600.Wm82.a2.v1	8907.03	7.58525	2.57689e-42	7.08624e-39	93.2543	91.3146	83.6667	16124.9	5184	19318.7
Glyma.02G205600.Wm82.a2.v1	18543.6	8.3605	4.8375e-42	1.23526e-38	112.134	112.861	104.333	26738.3	10385	47211.2
Glyma.16G201800.Wm82.a2.v1	2533.8	9.14515	1.41216e-41	3.36554e-38	9.15379	8.72106	7	3671.84	1439	6445.5
Glyma.10G237800.Wm82.a2.v1	7878.11	7.48229	1.79259e-41	4.00521e-38	92.6822	82.5935	80.6667	14836.1	4560.5	16501.1
Glyma.10G176400.Wm82.a2.v1	5831.98	7.43869	8.5702e-41	1.80221e-37	62.3602	71.3075	56.3333	11437.8	3251	11756.5
Glyma.19G011400.Wm82.a2.v1	5955.77	7.44054	1.71755e-40	3.41115e-37	73.8025	62.5864	63.6667	11525.9	3367.5	12160.8
Glyma.07G200000.Wm82.a2.v1	6124.94	7.42102	2.45365e-39	4.6166e-36	74.9467	67.2034	60.3333	10854	3386.5	13503.7
Glyma.09G040300.Wm82.a2.v1	1217.24	8.82301	3.71631e-38	6.64271e-35	4.00479	6.66904	4.66667	2430.76	646	2427.53
Glyma.08G212000.Wm82.a2.v1	21480.2	7.45342	1.39064e-37	2.36733e-34	239.143	248.294	231.333	34115.1	12079.5	51318.2
Glyma.07G200200.Wm82.a2.v1	41273.6	7.32547	1.03325e-36	1.67899e-33	511.468	511.464	479.333	65711.2	22765.5	98360.2
Glyma.06G157800.Wm82.a2.v1	26679.6	6.99077	1.08666e-36	1.689e-33	436.522	396.039	388	58040.7	14674	47845.2
Glyma.15G077700.Wm82.a2.v1	6002.4	8.44195	1.27976e-36	1.90626e-33	41.1921	27.7022	39	15732	3295	8208.7
Glyma.05G199300.Wm82.a2.v1	3214.18	7.57382	1.81736e-36	2.59875e-33	28.6056	38.4752	26.3333	7330.83	1767	5458.82
Glyma.16G069500.Wm82.a2.v1	4800.47	-7.74964	3.40854e-36	4.68661e-33	9345.45	9767.58	10241	53.2417	11	35.6203
Glyma.01G106800.Wm82.a2.v1	12266.8	7.15376	5.92142e-36	7.84018e-33	173.922	168.265	160.667	28412.7	6818.5	20312.5
Glyma.09G131500.Wm82.a2.v1	39218.3	6.71386	2.09326e-35	2.67257e-32	732.876	747.446	676.667	75366.3	22077	80026.4
Glyma.08G106700.Wm82.a2.v1	3632.24	8.76295	3.26062e-35	4.01945e-32	14.8749	18.4681	16.3333	4404.37	2048.5	10091.2
Glyma.06G054700.Wm82.a2.v1	21496.9	7.49322	4.56282e-35	5.43721e-32	244.292	230.338	223.333	31539.3	11988	53973.7
Glyma.13G176200.Wm82.a2.v1	34401.4	6.68281	6.31392e-35	7.28117e-32	693.972	632.533	604.667	68406.3	19118.5	67872.8
Glyma.06G134900.Wm82.a2.v1	9445.12	7.81446	6.65225e-35	7.4316e-32	88.1053	79.0025	80.3333	24599.5	5534	13013.9
Glyma.06G202200.Wm82.a2.v1	20083.6	7.27286	1.11338e-34	1.20613e-31	258.595	257.528	244.333	49079.6	11232	30738.6
Glyma.08G069000.Wm82.a2.v1	34248.5	6.92504	1.35246e-34	1.42204e-31	564.103	554.044	542	78511.2	19524.5	57364.8
Glyma.18G284900.Wm82.a2.v1	12766.7	6.83298	1.96952e-34	2.01166e-31	211.109	232.903	185.333	28207.1	6703.5	22415.9
Glyma.08G068800.Wm82.a2.v1	29285.6	7.16311	8.8752e-34	8.57512e-31	418.214	393.474	387.667	71470.5	15690	44860.2
Glyma.18G289100.Wm82.a2.v1	47999	8.15991	8.77234e-34	8.57512e-31	342.695	326.27	312.333	57455.1	27433.5	133872
Glyma.12G117900.Wm82.a2.v1	31490.3	7.86233	1.35338e-31	1.27321e-28	256.306	282.665	280.333	37979.7	20757.5	87442.6
Glyma.03G146100.Wm82.a2.v1	6975.73	7.12232	1.88937e-31	1.73187e-28	102.408	96.4446	95	17461.4	3993	10242.6
Glyma.01G220600.Wm82.a2.v1	30234.6	6.50629	1.88064e-30	1.68077e-27	625.891	689.989	617.333	69280.2	16887	50342.2
Glyma.01G225100.Wm82.a2.v1	16690.7	6.57696	2.57108e-30	2.24179e-27	367.868	324.218	336.667	27285.4	9521.5	38785.2
Glyma.20G156800.Wm82.a2.v1	2734.08	6.83504	3.08671e-30	2.6273e-27	50.3459	44.6313	41	6500.99	1579.5	4340.34
Glyma.03G061300.Wm82.a2.v1	2555.82	-6.77902	3.82639e-30	3.18115e-27	5091.8	5039.23	3882	47.7339	11	44.5254
Glyma.18G285100.Wm82.a2.v1	13674.8	6.86049	9.01533e-30	7.32475e-27	227.129	239.573	209	34148.1	7329.5	20084.5
Glyma.10G051100.Wm82.a2.v1	39173.6	6.5774	1.07794e-29	8.45874e-27	850.731	773.096	732.667	61907.2	20367.5	93163.2
Glyma.14G063700.Wm82.a2.v1	3438.52	7.1464	1.08843e-29	8.45874e-27	44.0526	52.3263	49.3333	4912.92	1993.5	8744.79
Glyma.08G084600.Wm82.a2.v1	2387.57	6.64762	1.25733e-29	9.56344e-27	54.3507	40.0143	55.3333	4244.65	1509.5	5211.25
Glyma.12G150400.Wm82.a2.v1	1941.89	6.82963	7.71297e-29	5.62716e-26	29.1777	38.4752	28.6667	3115.55	1081.5	4584.34
Glyma.14G063800.Wm82.a2.v1	12544	7.82232	7.70107e-29	5.62716e-26	110.418	110.296	115	13919.9	7149.5	36035.3
Glyma.13G176000.Wm82.a2.v1	21347.8	7.52048	8.61242e-29	6.15771e-26	231.705	230.851	228.667	25403.6	9794	59525.1
Glyma.01G211200.Wm82.a2.v1	108135	5.9753	1.65805e-28	1.16223e-25	3461.28	3306.31	3144.33	216998	60236.5	208774
Glyma.03G029200.Wm82.a2.v1	1009	9.07389	1.81156e-28	1.24541e-25	2.28845	5.13003	0.333333	2737.36	573	1291.24
Glyma.08G056600.Wm82.a2.v1	4416.78	6.33746	2.45728e-28	1.65746e-25	117.855	97.9836	99.6667	9915.8	2457	7535.48
Glyma.13G176300.Wm82.a2.v1	25181.7	6.43045	3.18588e-28	2.10911e-25	582.982	571.486	522.333	39226.2	13776	60346.2
Glyma.08G028300.Wm82.a2.v1	5924.41	7.51397	7.89723e-28	5.13305e-25	61.216	67.7164	67	6985.67	3384.5	16583
Glyma.03G086200.Wm82.a2.v1	28211.3	6.26694	1.10082e-27	7.02733e-25	699.121	747.446	686	45369.2	16028.5	66029.4
Glyma.01G224800.Wm82.a2.v1	6258.36	7.04701	1.37969e-27	8.6531e-25	100.692	87.2106	94	16569.2	3457	8276.38
Glyma.12G064000.Wm82.a2.v1	64123.6	5.86668	1.41447e-27	8.71823e-25	2186.04	2135.63	2006.33	124251	35669.5	127922
Glyma.06G191500.Wm82.a2.v1	2311.01	8.60315	1.96942e-27	1.1933e-24	10.8701	12.8251	12.3333	7027.9	1334.5	2192.43
Glyma.01G217400.Wm82.a2.v1	18456.5	7.22099	2.95683e-27	1.76173e-24	264.316	227.26	231	22669.9	10392.5	50664.6
Glyma.14G214800.Wm82.a2.v1	3562.7	5.9148	7.15087e-27	4.19076e-24	118.999	113.374	103.667	6671.73	1992.5	7346.69
Glyma.13G119000.Wm82.a2.v1	1812.67	6.67831	2.47225e-26	1.42549e-23	38.3315	31.8062	32.3333	4509.02	994.5	2671.52
Glyma.08G062300.Wm82.a2.v1	3010.21	5.84277	4.30161e-26	2.44092e-23	109.273	96.9576	95	5887.79	1956	5946.81
Glyma.05G221800.Wm82.a2.v1	6678.83	6.47011	4.62112e-26	2.58126e-23	153.326	144.667	145.333	9631.23	3816	16786.1
Glyma.05G149900.Wm82.a2.v1	12984.4	5.75183	5.12819e-26	2.82043e-23	469.704	476.58	437.333	23844.9	7158	27146.3
Glyma.17G042100.Wm82.a2.v1	224405	6.23882	5.21478e-26	2.82459e-23	5897.9	5832.33	5410.67	338527	122644	547363
Glyma.11G140500.Wm82.a2.v1	60707.1	5.79779	5.35472e-26	2.8571e-23	2117.96	2170	1970	107076	34124.5	131464
Glyma.03G157300.Wm82.a2.v1	14767.1	7.09685	1.08366e-25	5.697e-23	203.672	224.695	211.333	41102.6	8872.5	17537.7
Glyma.02G207900.Wm82.a2.v1	1258.83	6.51669	1.91397e-25	9.91632e-23	30.3219	24.1112	32.6667	1944.24	849.5	3036.63
Glyma.06G179200.Wm82.a2.v1	1877.5	6.54854	2.95145e-25	1.5073e-22	38.3315	41.0403	38.6667	2687.79	1053.5	4742.85
Glyma.04G228900.Wm82.a2.v1	693.652	6.11123	5.12304e-25	2.54366e-22	20.596	18.9811	19.3333	1349.4	388.5	1385.63
Glyma.17G072400.Wm82.a2.v1	75730.2	6.70478	5.11717e-25	2.54366e-22	1429.71	1446.67	1306.33	203627	41735	96417.1
Glyma.14G134900.Wm82.a2.v1	1823.12	7.43874	5.96386e-25	2.92057e-22	22.3124	19.4941	22	5186.47	1001	2064.2
Glyma.12G049100.Wm82.a2.v1	1372.29	8.98073	8.29306e-25	4.00633e-22	5.72112	5.13003	3.33333	4343.78	774.5	1134.51
Glyma.18G006700.Wm82.a2.v1	22242	6.08537	1.25362e-24	5.97541e-22	670.515	620.734	596.333	33503.7	12181.5	54173.2
Glyma.09G143200.Wm82.a2.v1	2535.05	5.69055	1.38001e-24	6.49133e-22	101.836	90.8016	91.6667	5201.16	1416.5	4746.41
Glyma.13G211000.Wm82.a2.v1	8278.46	6.43642	1.50797e-24	7.0011e-22	187.653	190.324	188	11281.7	4601.5	21454.1
Glyma.12G078100.Wm82.a2.v1	8786	5.58981	2.03639e-24	9.3332e-22	365.008	349.868	355.667	15911.9	4849.5	18517.2
Glyma.01G048700.Wm82.a2.v1	3636.66	6.21694	2.81959e-24	1.27592e-21	105.269	87.7236	83	8948.27	2004.5	5405.38
Glyma.20G203500.Wm82.a2.v1	873.749	10.6406	6.03319e-24	2.69601e-21	1.71634	0.513003	1.33333	2507.87	443	984.902
Glyma.17G098100.Wm82.a2.v1	2448.03	5.56385	6.8224e-24	3.01104e-21	105.269	97.4706	87.3333	4837.65	1326.5	4751.75
Glyma.09G163300.Wm82.a2.v1	17878.7	5.48645	7.33399e-24	3.19735e-21	787.798	772.583	713.667	32631.6	9936	37323
Glyma.20G015900.Wm82.a2.v1	4868.3	6.20038	1.29707e-23	5.58663e-21	130.442	130.816	130	12331.9	2651.5	6880.07
Glyma.09G118300.Wm82.a2.v1	834.119	-6.93164	2.03309e-23	8.65248e-21	1668.28	1641.1	1538.33	12.8514	6	14.2481
Glyma.08G273600.Wm82.a2.v1	467.791	6.30992	2.32507e-23	9.77868e-21	12.0144	11.2861	11	805.969	276	1041.89
Glyma.13G176500.Wm82.a2.v1	15081.8	6.19254	3.20564e-23	1.33254e-20	433.089	380.648	376	38620.4	8285	20893.1
Glyma.10G193200.Wm82.a2.v1	7915.27	5.66861	3.60329e-23	1.47645e-20	322.671	287.795	278.333	18058.1	4309.5	12992.5
Glyma.13G176100.Wm82.a2.v1	40546.3	5.4771	3.63443e-23	1.47645e-20	1791.86	1769.35	2094.67	88372	27381.5	70252.2
Glyma.16G096500.Wm82.a2.v1	292.351	6.89333	4.71217e-23	1.89276e-20	5.14901	4.61703	4.33333	602.181	161	557.458
Glyma.08G230500.Wm82.a2.v1	4635.71	-5.89466	5.99597e-23	2.38167e-20	9205.86	9030.4	8440.67	187.264	40.5	119.328
Glyma.13G138600.Wm82.a2.v1	39136.6	6.04511	8.48358e-23	3.33274e-20	1193.43	1141.95	1033	99277.3	18780	54933.7
Glyma.18G264400.Wm82.a2.v1	2617.25	5.74051	1.70193e-22	6.61331e-20	97.8312	94.3926	83.3333	4119.8	1501	6156.97
Glyma.15G124900.Wm82.a2.v1	1396.03	-6.14226	2.54602e-22	9.78686e-20	2751.29	2754.83	2549.33	47.7339	11.5	30.2773
Glyma.04G062200.Wm82.a2.v1	9211.76	5.87269	3.02669e-22	1.15108e-19	314.09	304.211	301.333	22846.2	5521	13382.6
Glyma.01G022800.Wm82.a2.v1	4092.18	6.36156	3.71131e-22	1.39658e-19	101.264	95.4186	111	5195.65	2746	10976.4
Glyma.01G103200.Wm82.a2.v1	15731.3	6.15974	7.29716e-22	2.71736e-19	417.07	450.93	423	41489.9	9204.5	20567.2
Glyma.01G098200.Wm82.a2.v1	991.153	8.27249	1.59549e-21	5.88012e-19	4.00479	8.72106	6.66667	3031.1	575	920.785
Glyma.04G102700.Wm82.a2.v1	980.877	-6.672	1.65593e-21	6.0406e-19	1954.91	1930.43	1946.33	25.7029	6.5	12.4671
Glyma.05G064700.Wm82.a2.v1	24494.9	5.21168	1.79589e-21	6.48498e-19	1298.69	1275.84	1245.67	43458	13870	51946.9
Glyma.12G233000.Wm82.a2.v1	734.902	7.44804	1.88744e-21	6.7474e-19	8.00957	8.72106	5.33333	2151.7	388	771.18
Glyma.04G229800.Wm82.a2.v1	3426.58	7.17901	2.11557e-21	7.48807e-19	50.3459	43.6053	44	10305	1939.5	3307.35
Glyma.08G180300.Wm82.a2.v1	2033.05	6.36336	3.90036e-21	1.367e-18	50.918	46.6833	47.3333	2515.21	1280.5	5519.37
Glyma.19G263100.Wm82.a2.v1	1957.54	-6.73668	5.80844e-21	2.01598e-18	3865.19	3892.16	3636.67	53.2417	7.5	19.5912
Glyma.18G231800.Wm82.a2.v1	2213.95	5.40566	1.00192e-20	3.44402e-18	98.4033	105.679	93.3333	5046.94	1313.5	3604.78
Glyma.14G100000.Wm82.a2.v1	1686.51	6.99393	1.74945e-20	5.95629e-18	32.0383	20.5201	23	4898.23	917.5	1795.26
Glyma.10G049900.Wm82.a2.v1	1352.89	5.31397	1.8299e-20	6.17142e-18	73.2304	59.5084	64.3333	2438.1	867	2840.72
Glyma.04G052000.Wm82.a2.v1	2244.9	5.57587	3.81859e-20	1.2758e-17	86.3889	97.9836	85.3333	3354.22	1216	5441.01
Glyma.17G047500.Wm82.a2.v1	582.465	-6.73103	5.03828e-20	1.6569e-17	1202.58	1105.52	1066.67	12.8514	2.5	8.90508
Glyma.18G293300.Wm82.a2.v1	219.455	7.18879	5.05196e-20	1.6569e-17	3.43267	2.56502	4	506.714	141.5	365.108
Glyma.08G242100.Wm82.a2.v1	2115.49	5.57338	5.79378e-20	1.88293e-17	90.9658	83.1065	74.6667	3124.73	1179.5	5163.17
Glyma.09G143000.Wm82.a2.v1	3106.83	5.75402	6.23874e-20	2.00927e-17	117.855	108.244	114.333	4270.35	1975.5	7930.87
Glyma.02G171100.Wm82.a2.v1	1130.85	5.19291	8.21273e-20	2.6214e-17	62.9323	57.4564	55.3333	2394.04	625	2008.99
Glyma.01G004200.Wm82.a2.v1	3168.74	5.16094	8.33055e-20	2.63548e-17	183.076	161.596	163.333	5370.06	1723	6960.21
Glyma.14G152700.Wm82.a2.v1	22100.6	4.92276	8.41645e-20	2.6393e-17	1449.73	1371.77	1371.33	41967.3	12192.5	43613.5
Glyma.14G046100.Wm82.a2.v1	3721.55	5.05021	9.09234e-20	2.82645e-17	219.119	217	202.667	7944.02	2223	6506.05
Glyma.17G133600.Wm82.a2.v1	30243.8	5.3236	1.16546e-19	3.59173e-17	1510.38	1436.92	1371	72063.5	16990	45964.5
Glyma.11G246600.Wm82.a2.v1	6257.14	7.98335	1.20772e-19	3.69016e-17	60.0718	38.4752	39.6667	20823	3543.5	4107.02
Glyma.12G231800.Wm82.a2.v1	296.981	7.62723	1.24867e-19	3.75115e-17	3.43267	2.56502	3.66667	811.476	146.5	370.451
Glyma.16G085600.Wm82.a2.v1	1219.07	7.27603	1.24385e-19	3.75115e-17	20.0239	11.2861	15.3333	3653.48	678	1191.5
Glyma.04G178500.Wm82.a2.v1	9503.56	5.02237	1.66651e-19	4.96468e-17	570.968	563.791	541	16198.3	5341.5	20681.2
Glyma.10G132200.Wm82.a2.v1	1208.66	5.98914	2.00856e-19	5.93423e-17	34.8988	40.0143	38.6667	3185.32	629	1574.42
Glyma.08G318900.Wm82.a2.v1	1284.27	9.64267	2.41053e-19	7.06345e-17	2.28845	4.10403	3	581.986	718	4548.72
Glyma.14G152800.Wm82.a2.v1	2053.3	6.25182	2.63648e-19	7.66272e-17	61.7881	44.6313	52	5643.62	1101	2463.15
Glyma.08G285900.Wm82.a2.v1	20242.9	5.19261	2.67514e-19	7.71239e-17	1097.88	1057.3	986.333	47199.6	10900	31616.6
Glyma.20G017200.Wm82.a2.v1	1793.58	5.18904	2.83555e-19	8.10945e-17	89.8216	101.575	77.3333	2963.17	973.5	4019.75
Glyma.12G044600.Wm82.a2.v1	979.356	-6.59976	3.07981e-19	8.73811e-17	1986.95	1890.42	1841.67	29.3747	8.5	10.6861
Glyma.14G096800.Wm82.a2.v1	5187.34	7.02746	3.4067e-19	9.58946e-17	77.8073	80.0285	81.6667	4446.6	3382	16144.9
Glyma.08G006600.Wm82.a2.v1	468.693	6.43299	3.76297e-19	1.05096e-16	8.58168	12.8251	11.6667	1228.23	275	625.137
Glyma.15G252000.Wm82.a2.v1	1982.92	6.96889	4.87698e-19	1.35153e-16	32.0383	30.7802	28	6086.07	1063.5	1782.8
Glyma.01G005100.Wm82.a2.v1	3163.06	5.13472	5.05688e-19	1.3906e-16	171.634	178.525	164	5081.82	1743.5	7220.24
Glyma.07G265000.Wm82.a2.v1	545.457	8.78565	6.15955e-19	1.6809e-16	3.43267	1.53901	1.33333	1742.29	302	434.568
Glyma.07G043600.Wm82.a2.v1	2764.66	6.037	6.35882e-19	1.72213e-16	76.0909	89.7756	85	7565.82	1499	3326.94
Glyma.08G025700.Wm82.a2.v1	1080.08	-5.25507	6.79557e-19	1.82658e-16	2143.7	2066.38	1992.33	53.2417	15.5	56.9925
Glyma.13G143600.Wm82.a2.v1	13191.7	5.28565	9.99655e-19	2.66692e-16	635.617	683.32	622	19402	7464	32045.8
Glyma.04G123800.Wm82.a2.v1	840.647	5.20555	1.02236e-18	2.70729e-16	49.7738	38.9883	41	1797.36	443.5	1476.46
Glyma.08G316700.Wm82.a2.v1	58945.7	5.48242	1.05882e-18	2.78323e-16	2630	2528.59	2514	150040	33126	80583.9
Glyma.16G178800.Wm82.a2.v1	31752.9	7.10686	1.40193e-18	3.65822e-16	447.964	466.833	409.333	24689.4	17942	101408
Glyma.09G167900.Wm82.a2.v1	2097.07	5.22739	1.44677e-18	3.74787e-16	109.846	108.244	108.667	4966.16	1228	3204.05
Glyma.06G289000.Wm82.a2.v1	19443.3	6.63981	1.52248e-18	3.91562e-16	383.315	388.856	356.333	17942.4	11199	59058.5
Glyma.08G321500.Wm82.a2.v1	594.04	-8.03689	1.71125e-18	4.36967e-16	1183.7	1183.5	1100	1.83592	1	7.12407
Glyma.17G092800.Wm82.a2.v1	14408.1	5.00504	1.91725e-18	4.86097e-16	873.043	867.489	811.333	22991.2	7765	32900.7
Glyma.13G082400.Wm82.a2.v1	1769.26	4.83111	2.31909e-18	5.83838e-16	120.144	120.043	124.667	3558.01	1091	3278.85
Glyma.16G161100.Wm82.a2.v1	738.44	-9.08459	2.47425e-18	6.18544e-16	1490.35	1457.96	1301.67	3.67184	1.5	1.78102
Glyma.09G040600.Wm82.a2.v1	929.772	-6.33742	2.94101e-18	7.30125e-16	1891.4	1782.17	1714.67	33.0465	7	12.4671
Glyma.16G088000.Wm82.a2.v1	5547.32	4.96897	3.09029e-18	7.61896e-16	339.263	347.303	305	8950.11	3086	12552.6
Glyma.13G031100.Wm82.a2.v1	3581.76	5.74211	3.3293e-18	8.152e-16	145.316	117.478	128.667	9513.73	1994.5	4550.5
Glyma.08G354700.Wm82.a2.v1	5030.22	4.8627	3.54974e-18	8.63263e-16	328.964	339.608	319	10960.4	2893.5	8491.89
Glyma.08G269000.Wm82.a2.v1	172.438	6.59527	3.69306e-18	8.92048e-16	4.00479	3.07802	4	315.778	103.5	366.889
Glyma.18G044200.Wm82.a2.v1	2496.51	5.11565	3.75247e-18	9.00315e-16	152.754	127.225	128.333	5761.11	1403	3944.95
Glyma.01G221800.Wm82.a2.v1	486.721	5.40841	4.06945e-18	9.69859e-16	26.8893	17.9551	29	890.421	396	1011.62
Glyma.07G200300.Wm82.a2.v1	1039.19	6.3541	4.72547e-18	1.11875e-15	24.0287	26.1632	24	1116.24	568.5	2990.33
Glyma.02G244300.Wm82.a2.v1	3636.64	5.91218	5.21074e-18	1.22552e-15	114.995	122.608	114.667	4237.3	2023	10071.6
Glyma.03G070400.Wm82.a2.v1	9752.78	5.23	5.34894e-18	1.2498e-15	519.478	492.996	505	23964.3	5845	14034.4
Glyma.07G066100.Wm82.a2.v1	9060.21	4.84228	5.69765e-18	1.32263e-15	609.299	611.5	582.667	15065.6	5120.5	19954.5
Glyma.04G102600.Wm82.a2.v1	491.922	-7.26713	5.87599e-18	1.35523e-15	1021.79	933.153	917	9.1796	2.5	3.56203
Glyma.18G094600.Wm82.a2.v1	7006.69	12.1683	7.77108e-18	1.78082e-15	4.5769	1.53901	2.33333	473.667	3973.5	27547
Glyma.11G223000.Wm82.a2.v1	472.704	5.84014	8.22151e-18	1.87204e-15	16.0191	16.4161	16	1217.21	303.5	641.166
Glyma.03G023900.Wm82.a2.v1	1175.16	4.82617	8.35281e-18	1.8899e-15	84.6726	75.4115	68	2348.14	662	2192.43
Glyma.08G029200.Wm82.a2.v1	3956.18	4.67042	8.76135e-18	1.96221e-15	300.931	297.029	287.667	7591.53	2155.5	7635.22
Glyma.13G278000.Wm82.a2.v1	1238	6.96687	8.78275e-18	1.96221e-15	22.8845	16.4161	17	3833.4	640	1079.3
Glyma.15G110600.Wm82.a2.v1	2085.6	7.25684	8.83706e-18	1.96221e-15	28.0335	26.1632	25.6667	6767.2	1133	1520.99
Glyma.13G262800.Wm82.a2.v1	820.312	5.66836	1.1097e-17	2.44882e-15	31.4662	31.8062	27.3333	2133.34	481	1084.64
Glyma.02G237300.Wm82.a2.v1	427.538	-7.29121	1.15822e-17	2.5402e-15	836.428	862.872	814	5.50776	1.5	5.34305
Glyma.17G140000.Wm82.a2.v1	652.796	-8.90962	1.17625e-17	2.56402e-15	1303.27	1302.52	1445	1.83592	0.5	3.56203
Glyma.05G157000.Wm82.a2.v1	26177.3	4.73229	1.20441e-17	2.60949e-15	1919.44	1877.08	1478	44554.1	12093.5	56358.5
Glyma.12G043500.Wm82.a2.v1	18502.6	4.81055	1.26631e-17	2.72707e-15	1271.81	1274.81	1175.33	41165	10028.5	30298.7
Glyma.01G078700.Wm82.a2.v1	505.36	6.85565	1.29219e-17	2.76614e-15	8.58168	8.72106	9.33333	1505.45	273	498.685
Glyma.13G116600.Wm82.a2.v1	1664.49	4.78458	1.41391e-17	2.99088e-15	126.437	106.705	100	3060.48	921.5	3364.34
Glyma.14G118200.Wm82.a2.v1	9041.16	5.77698	1.41149e-17	2.99088e-15	335.83	311.906	308	10596.9	5222	24920
Glyma.07G065500.Wm82.a2.v1	522.869	-5.62247	1.46023e-17	3.0707e-15	1006.92	1042.94	956.667	22.031	6.5	19.5912
Glyma.14G209000.Wm82.a2.v1	5771.81	5.90404	1.52578e-17	3.18978e-15	204.816	174.421	175	6552.4	3284.5	16155.6
Glyma.09G209400.Wm82.a2.v1	1592.54	-5.02159	1.67528e-17	3.48195e-15	3105.42	3074.43	2828.67	110.155	19.5	80.1457
Glyma.04G083200.Wm82.a2.v1	903.829	-7.6257	1.74227e-17	3.60025e-15	1810.73	1786.28	1616.67	16.5233	2.5	1.78102
Glyma.02G242000.Wm82.a2.v1	2013.58	4.91163	1.76893e-17	3.63434e-15	148.749	110.296	119.667	3565.36	1086	4229.91
Glyma.18G226500.Wm82.a2.v1	1190.25	-4.92416	2.02966e-17	4.14618e-15	2282.73	2326.47	2211.33	73.4368	18.5	78.3647
Glyma.11G051800.Wm82.a2.v1	6544.5	7.04972	2.2148e-17	4.49868e-15	100.692	95.4186	86.6667	21215.9	3572.5	4766
Glyma.10G157500.Wm82.a2.v1	2045.68	5.63218	2.2811e-17	4.60717e-15	75.5188	86.1846	88.6667	5456.35	1298	2564.66
Glyma.17G011100.Wm82.a2.v1	598.109	5.72744	3.83226e-17	7.69659e-15	21.7403	22.5721	20	1573.38	351	774.742
Glyma.20G094500.Wm82.a2.v1	424.814	5.2384	4.00336e-17	7.99531e-15	22.3124	21.5461	21	682.962	240.5	972.435
Glyma.03G081200.Wm82.a2.v1	539.244	6.1599	4.08631e-17	8.11564e-15	14.8749	14.8771	13	618.705	302.5	1508.52
Glyma.U012100.Wm82.a2.v1	37320.4	4.52542	5.3928e-17	1.06512e-14	3117.44	3094.95	2921.33	68971.8	20346	74097.4
Glyma.18G170900.Wm82.a2.v1	3678.4	4.5912	5.49232e-17	1.07882e-14	305.508	280.613	302.333	7400.59	2037	6726.9
Glyma.16G164800.Wm82.a2.v1	6509.41	4.54137	5.87073e-17	1.14685e-14	530.92	541.218	489.333	12063.8	3586.5	12901.7
Glyma.15G270000.Wm82.a2.v1	334.497	7.09498	6.99192e-17	1.35845e-14	4.5769	5.13003	6.66667	1000.58	194.5	327.707
Glyma.09G163200.Wm82.a2.v1	3327.49	5.15461	7.23139e-17	1.39738e-14	176.211	187.246	165.333	4655.89	1779	8290.63
Glyma.11G132800.Wm82.a2.v1	948.081	-5.11384	7.37929e-17	1.41829e-14	1777.55	1908.37	1225.33	44.0621	11.5	62.3356
Glyma.09G008400.Wm82.a2.v1	1181.86	-4.96419	8.28272e-17	1.58342e-14	2284.44	2296.2	2201.67	84.4523	20	62.3356
Glyma.16G056300.Wm82.a2.v1	1869.53	5.26782	9.09294e-17	1.72906e-14	93.2543	95.9316	80.3333	2535.4	1063.5	4753.53
Glyma.06G004200.Wm82.a2.v1	577.535	5.06119	9.17551e-17	1.73553e-14	29.1777	37.9622	28.6667	1274.13	319	968.873
Glyma.16G101000.Wm82.a2.v1	1621.19	5.86843	1.15006e-16	2.16386e-14	48.0574	61.0474	74.6667	1834.08	1369	4541.59
Glyma.11G025700.Wm82.a2.v1	4475.95	4.59325	1.54654e-16	2.89462e-14	354.137	358.076	342.333	7604.38	2405.5	9587.21
Glyma.11G198500.Wm82.a2.v1	3725.47	6.15318	1.6196e-16	3.01557e-14	96.687	109.783	99.3333	11085.3	2055	3610.12
Glyma.20G155100.Wm82.a2.v1	314.962	5.48411	1.73421e-16	3.21224e-14	13.1586	14.3641	11	471.831	151.5	760.494
Glyma.08G115300.Wm82.a2.v1	24811.1	4.46802	1.7806e-16	3.28117e-14	2117.39	2173.08	2002.33	50115.1	13315	44838.9
Glyma.09G072100.Wm82.a2.v1	5761.86	4.50315	1.9934e-16	3.65446e-14	504.031	469.398	440.333	10306.9	3222.5	11767.2
Glyma.12G066000.Wm82.a2.v1	772.825	-5.20537	2.16135e-16	3.94215e-14	1468.61	1541.06	1386.67	49.5698	13	32.0583
Glyma.09G161000.Wm82.a2.v1	1848.15	5.07217	2.21598e-16	4.02127e-14	109.273	104.14	122	2618.02	1089.5	4561.18
Glyma.20G213900.Wm82.a2.v1	1053.46	8.11599	2.52892e-16	4.56597e-14	7.43746	7.69505	7.66667	504.878	585.5	3693.83
Glyma.02G239800.Wm82.a2.v1	1241.36	5.017	2.58997e-16	4.64853e-14	74.3746	74.3855	62	1813.89	677	3002.79
Glyma.13G190100.Wm82.a2.v1	1242.76	6.13182	2.60065e-16	4.64853e-14	36.0431	33.8582	33.3333	1242.92	699.5	3658.21
Glyma.10G029600.Wm82.a2.v1	9370.89	6.73809	2.72222e-16	4.84163e-14	169.345	178.525	154.333	30186.2	5209	6949.53
Glyma.07G220200.Wm82.a2.v1	695.326	4.92598	3.70213e-16	6.55185e-14	42.9084	45.6573	44.6667	1602.76	372	1089.98
Glyma.13G095300.Wm82.a2.v1	32629.3	6.67988	4.07837e-16	7.18216e-14	637.905	622.786	581.333	24155.2	18663	105101
Glyma.12G222500.Wm82.a2.v1	3620.9	5.26659	4.35722e-16	7.6356e-14	177.927	188.785	182.333	9488.03	2067	4628.86
Glyma.18G082300.Wm82.a2.v1	822.481	-9.83146	4.67777e-16	8.15734e-14	1594.48	1691.88	1600.33	0	0.5	3.56203
Glyma.15G264600.Wm82.a2.v1	2859.12	6.72685	4.92991e-16	8.55531e-14	57.2112	49.7613	54.6667	9186.94	1542.5	2142.56
Glyma.15G256400.Wm82.a2.v1	158.327	5.99797	5.13009e-16	8.85969e-14	5.14901	4.61703	4.66667	363.512	85	260.028
Glyma.13G068800.Wm82.a2.v1	431.498	7.00901	6.23341e-16	1.07134e-13	4.00479	9.23406	4.66667	1290.65	245.5	422.101
Glyma.09G061500.Wm82.a2.v1	776.103	4.6817	6.67883e-16	1.1424e-13	64.6487	51.8133	68	1588.07	482.5	1399.88
Glyma.17G006900.Wm82.a2.v1	452.802	7.64303	7.53737e-16	1.28311e-13	2.28845	6.66904	5.33333	1424.67	262.5	377.575
Glyma.11G040700.Wm82.a2.v1	1415.6	6.45586	8.43868e-16	1.42974e-13	36.6152	27.1892	29.3333	4376.83	795.5	1221.78
Glyma.05G130000.Wm82.a2.v1	296.798	5.41231	8.57448e-16	1.44589e-13	9.72591	17.4421	6.66667	615.033	128.5	544.991
Glyma.09G054900.Wm82.a2.v1	685.177	6.52727	1.05319e-15	1.76763e-13	16.5913	12.8251	16	2103.96	455	607.327
Glyma.02G155700.Wm82.a2.v1	1875.27	8.43652	1.1499e-15	1.92093e-13	10.298	11.2861	19	629.72	1726	6849.79
Glyma.16G012000.Wm82.a2.v1	1559.9	6.44731	1.18708e-15	1.97381e-13	38.9036	31.8062	35.3333	4865.19	867	1303.7
Glyma.14G098200.Wm82.a2.v1	12167.1	4.41059	1.22716e-15	2.03101e-13	1094.45	1091.16	1046.33	25671.7	6765.5	20811.2
Glyma.01G138000.Wm82.a2.v1	776.761	5.79621	1.25078e-15	2.06056e-13	30.3219	24.6242	51.3333	2184.74	716.5	867.355
Glyma.08G078800.Wm82.a2.v1	524.849	8.752	1.29451e-15	2.12282e-13	2.28845	2.56502	2	240.505	300.5	1854.04
Glyma.11G189600.Wm82.a2.v1	310.414	-6.40655	1.34681e-15	2.1985e-13	626.463	600.727	577	7.34368	2.5	7.12407
Glyma.02G013500.Wm82.a2.v1	3407.01	4.67131	1.38217e-15	2.24597e-13	239.143	275.483	234.333	5292.96	1914	7820.44
Glyma.13G306900.Wm82.a2.v1	437.346	-8.33033	1.71315e-15	2.77052e-13	851.875	892.113	846.667	1.83592	0	3.56203
Glyma.15G082200.Wm82.a2.v1	8448.31	-4.91059	1.72049e-15	2.77052e-13	16568.4	16137.5	14988.7	387.379	162	699.939
Glyma.07G065600.Wm82.a2.v1	393.08	-5.40709	1.79083e-15	2.87087e-13	771.207	764.888	721.667	20.1951	12	16.0291
Glyma.17G227600.Wm82.a2.v1	361.166	6.13174	2.15218e-15	3.43474e-13	7.43746	12.8251	9.33333	998.74	210.5	425.663
Glyma.03G036500.Wm82.a2.v1	430.052	-5.86405	2.28946e-15	3.63759e-13	856.452	834.656	826	20.1951	6.5	8.90508
Glyma.11G234300.Wm82.a2.v1	71383.4	4.48005	2.34713e-15	3.71272e-13	6305.82	5940.07	5928.33	114629	38813	158658
Glyma.19G008300.Wm82.a2.v1	1321.45	-5.03822	2.52004e-15	3.96868e-13	2592.81	2536.8	2322	100.976	21	55.2115
Glyma.08G114600.Wm82.a2.v1	2791.1	4.32436	2.74252e-15	4.3001e-13	261.455	269.327	283.667	5094.68	1646	5538.96
Glyma.15G071300.Wm82.a2.v1	133925	4.37859	3.0123e-15	4.70247e-13	12560.7	12011.5	11169	223650	71676.5	287477
Glyma.08G161700.Wm82.a2.v1	419.055	-6.52594	3.03228e-15	4.71308e-13	831.851	826.448	789.667	3.67184	3	14.2481
Glyma.04G054600.Wm82.a2.v1	2739.89	4.30789	3.28283e-15	5.08043e-13	262.027	264.71	247.333	5406.78	1486	5026.03
Glyma.18G226400.Wm82.a2.v1	375.419	-5.41862	3.38673e-15	5.21863e-13	736.88	730.517	711.667	14.6874	3	19.5912
Glyma.07G192700.Wm82.a2.v1	154.343	5.54714	3.50117e-15	5.37182e-13	5.72112	7.18205	8	321.286	89	283.182
Glyma.15G266400.Wm82.a2.v1	313.25	-7.10571	3.86764e-15	5.90872e-13	590.42	653.566	553.667	3.67184	1	5.34305
Glyma.03G088800.Wm82.a2.v1	961.993	4.61388	3.91447e-15	5.95482e-13	76.0909	74.8985	65.6667	1534.83	532.5	2162.15
Glyma.15G180900.Wm82.a2.v1	2629.9	4.34347	4.03251e-15	6.1084e-13	251.729	242.138	238.333	4598.98	1484.5	5426.76
Glyma.20G152500.Wm82.a2.v1	519.313	6.82805	4.6869e-15	7.06971e-13	12.0144	6.15604	9.33333	1615.61	299	443.473
Glyma.09G127700.Wm82.a2.v1	658.088	-5.56369	4.89199e-15	7.34806e-13	1295.26	1282.51	1234	38.5543	10	16.0291
Glyma.14G156300.Wm82.a2.v1	6858.35	4.52761	5.01139e-15	7.49591e-13	586.987	553.018	521.667	10609.8	3373	15683.6
Glyma.11G063200.Wm82.a2.v1	388.076	10.5051	5.23645e-15	7.79991e-13	0	1.02601	0.666667	1191.51	233.5	359.765
Glyma.08G039200.Wm82.a2.v1	595.21	-9.36056	5.39612e-15	8.00439e-13	1166.54	1210.69	1104	1.83592	0.5	1.78102
Glyma.20G058600.Wm82.a2.v1	1516.38	4.53367	5.57009e-15	8.22831e-13	131.014	120.043	0	2423.41	0	3391.06
Glyma.03G183300.Wm82.a2.v1	2410.43	6.14227	5.63879e-15	8.29552e-13	66.365	68.2294	61	7446.49	1369	2060.64
Glyma.14G150500.Wm82.a2.v1	324.119	4.6966	6.2644e-15	9.17811e-13	24.0287	24.1112	22	649.915	174.5	598.422
Glyma.05G118300.Wm82.a2.v1	300.199	5.77452	6.61098e-15	9.64636e-13	9.72591	11.7991	12	365.348	164.5	813.924
Glyma.20G018500.Wm82.a2.v1	4962.34	4.42121	6.75016e-15	9.80941e-13	449.108	436.053	407	7978.9	2716	10985.3
Glyma.03G025600.Wm82.a2.v1	1514.02	4.64164	7.0767e-15	1.02423e-12	112.706	120.556	134.667	2285.72	1094.5	3537.1
Glyma.06G286600.Wm82.a2.v1	7100.99	4.69967	7.26228e-15	1.04685e-12	554.949	497.613	494.667	10194.9	3924.5	17156.5
Glyma.15G162600.Wm82.a2.v1	341.617	-7.55081	7.39661e-15	1.06193e-12	697.405	661.774	631.667	5.50776	1.5	1.78102
Glyma.03G021200.Wm82.a2.v1	600.678	-5.58447	7.65284e-15	1.09432e-12	1215.74	1137.84	1124	34.8825	9.5	14.2481
Glyma.04G079600.Wm82.a2.v1	329.208	-5.90335	7.87252e-15	1.12125e-12	639.621	655.618	622.667	7.34368	2	14.2481
Glyma.09G022400.Wm82.a2.v1	4284.95	-6.97458	8.72273e-15	1.23742e-12	8678.94	8325.53	7608.33	117.499	18	17.8102
Glyma.13G035200.Wm82.a2.v1	5555.15	11.5743	9.4758e-15	1.33893e-12	0.572112	6.66904	3.66667	374.528	3616.5	21838.8
Glyma.15G101600.Wm82.a2.v1	6035.6	4.30905	1.03454e-14	1.45606e-12	591.564	567.895	527	10088.4	3395	12894.6
Glyma.16G020700.Wm82.a2.v1	581.522	-6.98531	1.09605e-14	1.53658e-12	1209.45	1098.34	1077.33	16.5233	2	1.78102
Glyma.14G153800.Wm82.a2.v1	265.939	8.60563	1.21349e-14	1.68802e-12	1.71634	1.02601	2	877.569	151	183.445
Glyma.16G212500.Wm82.a2.v1	2105.83	4.63023	1.21352e-14	1.68802e-12	165.34	161.596	137.667	3093.52	1172.5	5002.88
Glyma.05G051600.Wm82.a2.v1	7308.93	4.17952	1.25621e-14	1.74063e-12	762.625	766.427	726.667	14333	3903.5	13373.7
Glyma.06G099500.Wm82.a2.v1	327.57	-7.48989	1.28584e-14	1.7748e-12	669.943	633.046	618.333	5.50776	0.5	1.78102
Glyma.16G217700.Wm82.a2.v1	2256.45	5.22816	1.32789e-14	1.82579e-12	120.144	114.4	113.333	6139.31	1308	2651.93
Glyma.10G159600.Wm82.a2.v1	302.386	-7.37705	1.53583e-14	2.10361e-12	619.025	583.285	565.667	3.67184	1	3.56203
Glyma.07G228400.Wm82.a2.v1	2169.44	5.34469	1.72641e-14	2.35563e-12	90.3937	117.991	91	5977.75	1284	2491.64
Glyma.15G240100.Wm82.a2.v1	171.773	5.68548	1.74172e-14	2.36748e-12	8.00957	5.13003	6	262.536	98.5	411.415
Glyma.15G270100.Wm82.a2.v1	760.052	6.52281	1.75407e-14	2.37524e-12	18.8797	13.8511	16	2419.74	429.5	587.735
Glyma.18G211000.Wm82.a2.v1	552.608	-4.95823	1.8737e-14	2.52766e-12	1079.58	1061.92	1018	42.2261	17	26.7152
Glyma.20G036500.Wm82.a2.v1	242.997	6.62995	2.02977e-14	2.7279e-12	4.5769	5.13003	6.66667	732.532	149.5	229.751
Glyma.17G233700.Wm82.a2.v1	21768.4	4.1406	2.11853e-14	2.83653e-12	2452.64	2219.25	2211.67	41073.2	11644	41328.5
Glyma.06G319700.Wm82.a2.v1	407.642	7.24146	2.18634e-14	2.9164e-12	4.00479	6.66904	8	1342.06	235.5	277.839
Glyma.04G071900.Wm82.a2.v1	7427.48	4.13662	2.27259e-14	3.02018e-12	821.553	776.687	733	13820.8	4039.5	14290.9
Glyma.11G017100.Wm82.a2.v1	3021.52	5.00242	2.35689e-14	3.12061e-12	182.504	183.142	182.667	7966.05	1707	3754.38
Glyma.13G349300.Wm82.a2.v1	837.792	4.88332	2.49659e-14	3.29338e-12	49.7738	60.0214	59.6667	2081.93	462.5	1159.44
Glyma.07G204200.Wm82.a2.v1	213.708	5.03686	2.63262e-14	3.46006e-12	10.8701	14.3641	11.6667	464.488	120	365.108
Glyma.07G197100.Wm82.a2.v1	51494	5.13275	2.86622e-14	3.75328e-12	2865.14	2843.06	2653.33	59544.4	28598.5	140723
Glyma.03G029100.Wm82.a2.v1	624.389	5.526	2.93614e-14	3.83081e-12	26.8893	26.1632	13	1758.81	336.5	685.691
Glyma.15G041100.Wm82.a2.v1	534.698	-6.48168	3.01858e-14	3.92405e-12	1061.84	1053.2	985.333	20.1951	3.5	3.56203
Glyma.13G323800.Wm82.a2.v1	358.177	-6.80244	3.13653e-14	4.0626e-12	704.27	715.64	667.667	11.0155	0.5	1.78102
Glyma.09G116400.Wm82.a2.v1	6271.06	5.48905	3.44366e-14	4.44431e-12	278.047	268.301	261.333	18192.1	3456	6345.76
Glyma.10G221100.Wm82.a2.v1	309.322	-5.80377	3.47054e-14	4.46289e-12	587.559	627.916	604.667	14.6874	2.5	7.12407
Glyma.13G179200.Wm82.a2.v1	27826	4.69204	3.69273e-14	4.73159e-12	2129.97	2015.59	1974.33	37643.7	15299	69514.9
Glyma.06G302600.Wm82.a2.v1	371.764	-5.05457	4.02871e-14	5.14365e-12	774.64	668.956	691.333	23.8669	4	19.5912
Glyma.20G136000.Wm82.a2.v1	336.996	-5.33359	4.35005e-14	5.53416e-12	660.217	655.105	630	20.1951	3.5	12.4671
Glyma.20G013600.Wm82.a2.v1	113.756	5.88888	4.5432e-14	5.75939e-12	3.43267	4.10403	3.66667	253.357	64	194.131
Glyma.10G282900.Wm82.a2.v1	655.454	-4.50794	5.37035e-14	6.78391e-12	1278.67	1232.75	1170	58.7494	17.5	51.6495
Glyma.02G018500.Wm82.a2.v1	6861.99	4.25711	5.61564e-14	7.06878e-12	695.688	668.443	659.667	10986.1	3653.5	15097.7
Glyma.02G098800.Wm82.a2.v1	1576.99	4.18564	5.65803e-14	7.09716e-12	166.485	162.109	146.667	3233.05	804.5	2746.33
Glyma.07G262900.Wm82.a2.v1	562.582	12.0159	5.82418e-14	7.28002e-12	0.572112	0	1	1499.95	304	749.808
Glyma.11G170000.Wm82.a2.v1	2883.41	4.71013	6.21158e-14	7.7372e-12	215.114	209.305	214	7240.87	1530	3868.37
Glyma.09G055600.Wm82.a2.v1	585.135	-6.22135	6.57066e-14	8.15606e-12	1116.76	1192.73	1120	25.7029	6	5.34305
Glyma.11G070600.Wm82.a2.v1	372.499	-7.67201	6.99821e-14	8.65671e-12	715.712	766.94	716.333	7.34368	0.5	0
Glyma.01G058300.Wm82.a2.v1	1256.09	4.2332	7.60667e-14	9.37693e-12	126.437	127.225	130.667	2658.41	696.5	2112.29
Glyma.10G025600.Wm82.a2.v1	1486.77	6.64413	7.75185e-14	9.52306e-12	33.7546	25.1372	25	4947.8	854	940.377
Glyma.10G213500.Wm82.a2.v1	113.34	6.11063	8.25475e-14	1.01061e-11	2.86056	3.59102	2.33333	174.412	84	272.496
Glyma.03G017000.Wm82.a2.v1	11314.8	5.15591	9.42632e-14	1.15011e-11	611.016	623.812	565.333	31541.1	6107.5	12483.1
Glyma.18G197100.Wm82.a2.v1	227.433	4.67626	1.30167e-13	1.58277e-11	18.8797	15.3901	40.3333	449.8	263	425.663
Glyma.04G223500.Wm82.a2.v1	5344.72	4.0409	1.34199e-13	1.62626e-11	589.848	634.585	582	9544.94	2928.5	10609.5
Glyma.07G178500.Wm82.a2.v1	1161.29	5.58149	1.36477e-13	1.64828e-11	45.769	49.2483	48.6667	1119.91	648	3430.24
Glyma.14G145800.Wm82.a2.v1	3015	6.35964	1.37089e-13	1.6501e-11	63.5044	81.5675	76.3333	9884.59	2138	2030.36
Glyma.18G244500.Wm82.a2.v1	1408.5	4.16315	1.46717e-13	1.76006e-11	136.735	161.083	163	2867.71	851	2468.49
Glyma.03G047700.Wm82.a2.v1	244.497	-6.47522	1.47763e-13	1.76668e-11	467.416	499.665	448.333	7.34368	1.5	3.56203
Glyma.02G135100.Wm82.a2.v1	458.84	-8.98832	1.50383e-13	1.79202e-11	937.12	894.678	852	0	1	3.56203
Glyma.15G250500.Wm82.a2.v1	4672.59	4.43131	1.61967e-13	1.92364e-11	411.349	416.559	368	11158.7	2568	6703.75
Glyma.09G022300.Wm82.a2.v1	698.712	-5.91614	1.70941e-13	2.0235e-11	1355.91	1393.32	1292	36.7184	5.5	8.90508
Glyma.02G145400.Wm82.a2.v1	3724.68	4.30983	1.73471e-13	2.04667e-11	362.719	352.433	126	8560.89	1346.5	5622.67
Glyma.12G017900.Wm82.a2.v1	421.987	-6.25364	1.77311e-13	2.0851e-11	871.899	794.129	767.333	18.3592	4.5	3.56203
Glyma.18G206600.Wm82.a2.v1	786.189	5.95233	1.89586e-13	2.22213e-11	21.7403	28.2152	20.6667	2421.58	447.5	673.224
Glyma.17G085800.Wm82.a2.v1	279.558	5.11311	2.02882e-13	2.37021e-11	16.0191	15.3901	12.6667	370.856	174.5	715.969
Glyma.16G043200.Wm82.a2.v1	15208.1	4.00527	2.03998e-13	2.37548e-11	1824.47	1741.65	1714	30656.2	8021.5	26610.2
Glyma.01G221700.Wm82.a2.v1	192.395	4.91721	2.11211e-13	2.44658e-11	9.72591	14.8771	18	374.528	204	370.451
Glyma.04G208000.Wm82.a2.v1	260.039	4.82986	2.11473e-13	2.44658e-11	19.4518	15.9031	17.6667	605.853	144	398.948
Glyma.02G036400.Wm82.a2.v1	1598.22	4.66239	2.1969e-13	2.53345e-11	110.99	131.842	117	3996.8	859.5	2153.25
Glyma.14G145900.Wm82.a2.v1	6708.92	5.19049	2.48474e-13	2.85617e-11	354.137	361.154	324.667	19058.7	3532.5	7061.73
Glyma.16G038300.Wm82.a2.v1	1172.86	-4.23563	2.52596e-13	2.89424e-11	2244.97	2210.02	2100.67	104.647	28.5	131.795
Glyma.10G187200.Wm82.a2.v1	926.457	4.1414	2.67688e-13	3.05737e-11	101.264	97.4706	845.667	1914.86	2572.5	1592.23
Glyma.18G003700.Wm82.a2.v1	140.583	5.29537	2.79532e-13	3.18248e-11	5.72112	8.20805	6.33333	233.162	69	315.24
Glyma.08G129800.Wm82.a2.v1	1053.06	4.15051	2.87321e-13	3.25045e-11	117.855	106.705	103.667	1786.35	547	2201.34
Glyma.10G127000.Wm82.a2.v1	793.257	4.20278	2.87115e-13	3.25045e-11	87.5332	75.9245	71.6667	1656	504	1353.57
Glyma.14G210600.Wm82.a2.v1	761.885	4.39209	3.66695e-13	4.13532e-11	64.6487	73.8725	70.3333	1747.8	407.5	1161.22
Glyma.08G118000.Wm82.a2.v1	1118.93	4.15091	3.94633e-13	4.4364e-11	113.85	124.66	108	1852.44	597.5	2384.78
Glyma.17G226500.Wm82.a2.v1	15464.9	4.74063	4.07688e-13	4.56879e-11	1145.94	1084.49	1129	18959.5	8732	40669.5
Glyma.04G216100.Wm82.a2.v1	2594.02	5.56883	4.17113e-13	4.6598e-11	105.841	108.244	108.333	7844.88	1408	2317.1
Glyma.01G127200.Wm82.a2.v1	599.771	-4.76178	4.19299e-13	4.66963e-11	1182.56	1131.17	1124	55.0776	14.5	30.2773
Glyma.18G123600.Wm82.a2.v1	592.169	4.24342	4.23588e-13	4.70275e-11	57.2112	61.5604	56.6667	1266.78	382	983.121
Glyma.05G065300.Wm82.a2.v1	13169.3	3.97147	4.63863e-13	5.13395e-11	1572.16	1584.67	1443.33	22422.1	6929.5	27098.2
Glyma.08G097900.Wm82.a2.v1	476.725	-4.55892	4.81087e-13	5.30815e-11	947.99	881.34	897	33.0465	11	44.5254
Glyma.03G176100.Wm82.a2.v1	997.845	5.97195	4.89634e-13	5.38582e-11	29.7498	32.8322	26	3152.27	564	776.523
Glyma.09G006200.Wm82.a2.v1	1182.38	6.43688	4.96999e-13	5.45007e-11	25.745	28.2152	25.3333	3943.55	651.5	731.998
Glyma.05G129900.Wm82.a2.v1	1306.22	4.31647	5.2981e-13	5.7921e-11	107.557	142.102	149.333	2052.56	973	2922.65
Glyma.08G067700.Wm82.a2.v1	5224.34	3.91131	5.40262e-13	5.88836e-11	648.775	653.566	625	10014.9	2886.5	9580.09
Glyma.18G231900.Wm82.a2.v1	3395.94	4.20139	5.57069e-13	6.05309e-11	338.118	362.18	351	5168.11	2118	7715.36
Glyma.12G084600.Wm82.a2.v1	369.193	-8.67018	5.74325e-13	6.22168e-11	752.9	720.257	664	1.83592	2.5	1.78102
Glyma.08G251900.Wm82.a2.v1	142.6	6.83112	5.89508e-13	6.36687e-11	4.00479	1.02601	192	383.707	89	181.664
Glyma.10G168900.Wm82.a2.v1	671.768	-4.46993	6.03028e-13	6.49326e-11	1314.14	1256.86	1190	69.7649	16	46.3064
Glyma.02G001100.Wm82.a2.v1	249.976	-6.08474	6.65197e-13	7.1198e-11	500.026	485.301	468.667	11.0155	2	3.56203
Glyma.19G198900.Wm82.a2.v1	250.381	-5.37572	6.65132e-13	7.1198e-11	488.012	489.918	456.333	14.6874	3	8.90508
Glyma.13G001500.Wm82.a2.v1	803.27	4.0279	6.67337e-13	7.12139e-11	93.2543	92.3406	82.6667	1540.34	437.5	1487.15
Glyma.09G137000.Wm82.a2.v1	211.065	-6.03647	7.05881e-13	7.48925e-11	431.945	399.63	379.667	7.34368	2.5	5.34305
Glyma.15G021800.Wm82.a2.v1	306.946	-7.81012	7.06e-13	7.48925e-11	623.602	598.675	530.333	5.50776	0.5	0
Glyma.18G060900.Wm82.a2.v1	9615.95	5.88024	8.11726e-13	8.58533e-11	326.104	316.01	308.333	30731.5	5318.5	7090.23
Glyma.05G172300.Wm82.a2.v1	701.251	4.05248	8.57741e-13	9.04525e-11	78.3794	81.0545	54.6667	1395.3	91	1250.27
Glyma.11G195900.Wm82.a2.v1	3467.25	3.89887	8.66407e-13	9.10976e-11	444.531	426.819	394.667	6245.8	1852	6751.83
Glyma.19G214300.Wm82.a2.v1	442.179	5.60605	8.94262e-13	9.37507e-11	16.5913	18.9811	19.6667	424.097	244	1309.05
Glyma.03G201600.Wm82.a2.v1	519.678	-4.68082	9.08315e-13	9.46687e-11	1002.34	998.304	978	49.5698	10.5	28.4963
Glyma.13G091100.Wm82.a2.v1	14592.9	4.65129	9.0653e-13	9.46687e-11	1130.49	1103.47	989	38172.4	7567.5	17965.1
Glyma.09G162500.Wm82.a2.v1	10015.4	5.68685	9.34234e-13	9.7087e-11	387.892	375.005	319.333	31284.1	5660	8014.57
Glyma.03G015900.Wm82.a2.v1	3228.59	3.91132	9.41562e-13	9.7565e-11	416.498	388.343	298.667	5729.9	1265	6379.6
Glyma.10G183900.Wm82.a2.v1	1038.54	-4.9212	1.06229e-12	1.09757e-10	2005.25	2016.1	1909	93.6319	21.5	39.1824
Glyma.12G095700.Wm82.a2.v1	53283.6	4.25928	1.09467e-12	1.12452e-10	5255.99	5321.38	4842.67	75768.4	28569	126789
Glyma.18G083200.Wm82.a2.v1	207.79	-6.50821	1.09433e-12	1.12452e-10	425.079	397.065	396	3.67184	2	5.34305
Glyma.04G228800.Wm82.a2.v1	3111.7	5.44638	1.14231e-12	1.1701e-10	153.898	125.173	134.667	9344.83	1714	2822.91
Glyma.11G039400.Wm82.a2.v1	2476.32	4.5501	1.17741e-12	1.20197e-10	200.811	204.688	180.667	6308.22	1349	3191.58
Glyma.11G213000.Wm82.a2.v1	431.145	-5.86343	1.18089e-12	1.20197e-10	867.894	827.474	825.333	23.8669	4	5.34305
Glyma.13G067500.Wm82.a2.v1	151.977	8.12693	1.18351e-12	1.20197e-10	1.14422	1.02601	1	482.847	75.5	122.89
Glyma.12G166200.Wm82.a2.v1	6053.36	4.17684	1.28297e-12	1.29929e-10	655.068	613.552	610.333	13995.2	3268.5	8949.61
Glyma.03G142400.Wm82.a2.v1	804.216	-4.50067	1.32757e-12	1.34065e-10	1580.17	1500.53	1432.67	86.2882	15.5	49.8685
Glyma.13G117900.Wm82.a2.v1	15108.3	4.20118	1.39967e-12	1.40948e-10	1579.6	1536.44	1529	21867.6	8720	35449.4
Glyma.14G171100.Wm82.a2.v1	123291	4.36037	1.60433e-12	1.61104e-10	11424.5	11470.8	11674.3	165943	70953	304326
Glyma.09G057100.Wm82.a2.v1	240.801	-7.4658	1.70069e-12	1.70303e-10	486.867	470.937	475.333	1.83592	1	3.56203
Glyma.01G096200.Wm82.a2.v1	83.1963	6.65213	1.71872e-12	1.71627e-10	2.28845	1.02601	1.33333	178.084	45.5	151.386
Glyma.15G131200.Wm82.a2.v1	3670.06	3.87387	1.75063e-12	1.74326e-10	473.137	464.268	640	7402.43	2804.5	6340.42
Glyma.15G098100.Wm82.a2.v1	11506.1	3.81093	1.76009e-12	1.74782e-10	1565.3	1495.92	1404.33	21258.1	6229	21705.2
Glyma.05G161700.Wm82.a2.v1	603.408	4.02936	1.82316e-12	1.80065e-10	66.9371	72.3335	73.3333	1072.18	378	1202.19
Glyma.13G273600.Wm82.a2.v1	598.753	4.14481	1.82336e-12	1.80065e-10	63.5044	64.6384	57.3333	1297.99	332	968.873
Glyma.13G205100.Wm82.a2.v1	396.004	6.05958	1.84114e-12	1.8132e-10	13.1586	10.2601	10	312.106	206	1248.49
Glyma.17G139900.Wm82.a2.v1	969.864	-11.0654	1.8875e-12	1.85374e-10	1979.51	1898.11	1806.33	1.83592	0.5	0
Glyma.12G094300.Wm82.a2.v1	296.059	6.36977	1.98972e-12	1.94878e-10	8.00957	6.15604	5.33333	951.006	167	219.065
Glyma.08G332900.Wm82.a2.v1	8371.98	3.96934	2.14242e-12	2.0926e-10	985.177	1024.47	953.333	18184.8	4392.5	13293.5
Glyma.05G232700.Wm82.a2.v1	434.364	4.08697	2.19738e-12	2.14044e-10	50.918	45.6573	46.3333	793.117	238.5	847.764
Glyma.01G148400.Wm82.a2.v1	100.998	6.9462	2.31099e-12	2.24499e-10	1.71634	1.53901	0.333333	119.335	61	281.401
Glyma.10G273000.Wm82.a2.v1	172.294	4.55356	2.34828e-12	2.27503e-10	14.3028	13.8511	9.33333	306.599	99	354.422
Glyma.20G087800.Wm82.a2.v1	828.78	4.22794	2.36349e-12	2.28358e-10	86.3889	81.5675	73.3333	1909.36	458.5	1237.81
Glyma.17G053000.Wm82.a2.v1	251.147	-5.62385	2.45646e-12	2.36701e-10	492.589	491.97	454	14.6874	3	5.34305
Glyma.18G238000.Wm82.a2.v1	3461.04	4.43523	2.4797e-12	2.38298e-10	304.364	307.289	310.667	4510.85	2036.5	8721.64
Glyma.18G197200.Wm82.a2.v1	226.015	5.18535	2.55123e-12	2.44515e-10	10.298	13.8511	0	598.51	0	281.401
Glyma.05G144300.Wm82.a2.v1	1352.69	4.09291	2.56807e-12	2.4547e-10	153.326	146.206	143	3027.43	756	2083.79
Glyma.08G175900.Wm82.a2.v1	5133.69	3.79156	3.18396e-12	3.03529e-10	709.991	673.06	652.667	9186.94	2718	9964.79
Glyma.18G054100.Wm82.a2.v1	4181.7	3.89255	3.53032e-12	3.35653e-10	510.896	544.296	518.333	8828.94	2708	6842.66
Glyma.01G172600.Wm82.a2.v1	593.67	-6.24004	3.61218e-12	3.42525e-10	1193.43	1150.15	1108	27.5388	5	3.56203
Glyma.14G030400.Wm82.a2.v1	29683.9	3.78016	3.67609e-12	3.47663e-10	4051.13	4005.02	3849.33	59202.9	15606.5	51476.7
Glyma.05G219400.Wm82.a2.v1	1268.44	-3.92928	3.77496e-12	3.56071e-10	2354.24	2407.01	2214.67	146.874	51.5	165.635
Glyma.07G160500.Wm82.a2.v1	9233.81	3.82267	3.80368e-12	3.57836e-10	1234.05	1204.02	1160.33	18961.4	4873.5	15535.8
Glyma.11G228000.Wm82.a2.v1	184.351	-6.06537	4.03916e-12	3.78992e-10	378.738	347.816	337.667	5.50776	1	5.34305
Glyma.08G141100.Wm82.a2.v1	4424.53	4.37192	4.10058e-12	3.83289e-10	419.358	396.039	409	5792.33	2631.5	11090.4
Glyma.18G293500.Wm82.a2.v1	271.097	6.5855	4.1064e-12	3.83289e-10	3.43267	7.69505	3.66667	870.226	147.5	203.036
Glyma.07G230200.Wm82.a2.v1	445.956	4.08076	4.13344e-12	3.84808e-10	49.7738	49.7613	35.3333	934.483	243	749.808
Glyma.10G232800.Wm82.a2.v1	215.37	-5.39967	4.15336e-12	3.85658e-10	403.911	437.592	407.667	12.8514	2	7.12407
Glyma.18G096400.Wm82.a2.v1	74096.1	4.97467	4.24593e-12	3.93233e-10	4686.74	4448.76	4290.33	212174	40420.5	75075.2
Glyma.16G002500.Wm82.a2.v1	7930.53	3.97995	4.61728e-12	4.2652e-10	989.754	900.834	815	12192.3	3781.5	17639.2
Glyma.02G197300.Wm82.a2.v1	529.041	4.06747	4.72942e-12	4.35752e-10	65.7929	53.3523	62	1088.7	284	908.318
Glyma.05G057100.Wm82.a2.v1	340.92	-11.0014	4.89483e-12	4.49834e-10	681.386	682.294	632.333	0	0	0
Glyma.06G145300.Wm82.a2.v1	180.786	-6.03682	5.15247e-12	4.72297e-10	344.984	367.31	349.667	5.50776	1.5	5.34305
Glyma.05G124800.Wm82.a2.v1	225.494	-6.35361	5.23013e-12	4.75755e-10	475.997	415.02	394	9.1796	1	1.78102
Glyma.15G229400.Wm82.a2.v1	2017.6	5.23895	5.21205e-12	4.75755e-10	93.2543	114.913	89.3333	5983.26	1125.5	1878.97
Glyma.U019400.Wm82.a2.v1	211.014	-5.24195	5.22339e-12	4.75755e-10	436.522	385.778	382.667	12.8514	3.5	8.90508
Glyma.01G178600.Wm82.a2.v1	3700.78	3.79733	5.33115e-12	4.83714e-10	497.738	495.561	473	6306.38	1973.5	7503.42
Glyma.08G341100.Wm82.a2.v1	238.173	-5.30982	5.69982e-12	5.15855e-10	444.531	484.788	428.333	7.34368	2.5	16.0291
Glyma.13G036200.Wm82.a2.v1	231.448	-5.04742	6.03157e-12	5.44501e-10	425.079	473.502	437.667	16.5233	2.5	10.6861
Glyma.02G197600.Wm82.a2.v1	335.869	4.45719	6.40733e-12	5.75517e-10	24.6008	33.8582	30.3333	506.714	183	778.304
Glyma.09G006100.Wm82.a2.v1	508.97	5.90274	6.39344e-12	5.75517e-10	16.0191	17.4421	19.3333	1626.62	262.5	375.794
Glyma.02G234200.Wm82.a2.v1	1308.37	5.69208	6.47481e-12	5.8012e-10	47.4853	51.8133	48	4152.85	713	981.34
Glyma.17G045900.Wm82.a2.v1	3460.01	4.02296	6.79332e-12	6.07136e-10	389.036	412.968	405.333	5155.26	1942.5	7882.78
Glyma.20G170400.Wm82.a2.v1	218.634	-6.30852	6.81506e-12	6.0756e-10	438.81	424.767	427.667	9.1796	2	1.78102
Glyma.03G126800.Wm82.a2.v1	1483.44	11.4177	6.8547e-12	6.09574e-10	1.14422	1.02601	1.66667	27.5388	938.5	5904.07
Glyma.13G222100.Wm82.a2.v1	135.699	5.78418	6.92914e-12	6.14665e-10	4.00479	5.64304	5	378.199	71.5	154.948
Glyma.07G253500.Wm82.a2.v1	449.94	-5.15603	7.17777e-12	6.35144e-10	861.029	889.548	843.667	36.7184	3.5	12.4671
Glyma.09G255100.Wm82.a2.v1	2300.27	3.98491	7.41129e-12	6.54188e-10	285.484	261.119	284	5138.74	1238.5	3515.73
Glyma.11G227200.Wm82.a2.v1	245.83	-7.48807	7.73856e-12	6.81393e-10	486.867	490.944	464.333	5.50776	1	0
Glyma.13G071400.Wm82.a2.v1	148.105	4.86086	7.77163e-12	6.82624e-10	12.5865	7.18205	9	269.88	85.5	302.773
Glyma.13G106400.Wm82.a2.v1	225.108	-5.77003	7.93175e-12	6.94981e-10	445.675	438.618	421.667	3.67184	3.5	12.4671
Glyma.13G307000.Wm82.a2.v1	316.184	-10.8927	8.18172e-12	7.13386e-10	637.333	627.403	604	0	0	0
Glyma.14G054000.Wm82.a2.v1	2735.84	6.66892	8.17842e-12	7.13386e-10	52.6343	53.8653	56.6667	9686.31	1516.5	1150.54
Glyma.05G225900.Wm82.a2.v1	2591.32	3.73443	8.32816e-12	7.24388e-10	347.272	377.057	351	4775.23	1354	4865.74
Glyma.09G040400.Wm82.a2.v1	5883.85	3.70619	8.40893e-12	7.29638e-10	868.466	806.441	778	10909	3082	10951.5
Glyma.01G009300.Wm82.a2.v1	272.064	-4.71715	8.85246e-12	7.66263e-10	544.079	504.282	472.667	23.8669	6	16.0291
Glyma.10G000300.Wm82.a2.v1	183.476	-5.46374	9.05576e-12	7.81967e-10	377.022	340.634	396.333	7.34368	2.5	8.90508
Glyma.20G081500.Wm82.a2.v1	1308.2	3.77183	9.1094e-12	7.84703e-10	172.778	184.168	172.667	2362.83	830.5	2513.01
Glyma.17G224500.Wm82.a2.v1	233.817	5.81976	9.39342e-12	8.07224e-10	8.58168	7.69505	8	714.173	121.5	204.817
Glyma.06G154400.Wm82.a2.v1	6546.28	3.69166	9.68392e-12	8.30193e-10	946.273	934.692	910.667	11746.2	3525	12557.9
Glyma.08G321200.Wm82.a2.v1	308.095	-10.8553	9.75129e-12	8.33968e-10	612.16	620.221	556	0	0	0
Glyma.17G032600.Wm82.a2.v1	1161.89	4.08154	1.01738e-11	8.68022e-10	125.293	133.894	109	2678.61	646	1709.78
Glyma.12G089200.Wm82.a2.v1	2777.2	3.91287	1.03026e-11	8.7692e-10	348.416	343.199	337.333	4288.71	1669.5	6128.48
Glyma.02G081100.Wm82.a2.v1	239.639	-7.45101	1.05433e-11	8.95277e-10	495.449	457.599	483.333	5.50776	0	0
Glyma.12G182500.Wm82.a2.v1	167.264	7.11775	1.08137e-11	9.16064e-10	1.14422	3.59102	2	536.088	137	128.233
Glyma.07G051700.Wm82.a2.v1	303.168	-10.832	1.0883e-11	9.19756e-10	600.146	612.526	569.333	0	0	0
Glyma.03G247100.Wm82.a2.v1	32831.1	3.66401	1.09511e-11	9.23327e-10	4779.42	4823.26	4619.33	59434.2	17699	62287.5
Glyma.05G218500.Wm82.a2.v1	7301.67	5.06118	1.11481e-11	9.37729e-10	420.502	428.871	390.667	6847.98	4034.5	21509.3
Glyma.18G000400.Wm82.a2.v1	128.995	8.31591	1.13598e-11	9.53292e-10	0.572112	1.02601	0.333333	405.738	79	108.642
Glyma.06G028500.Wm82.a2.v1	547.448	4.48344	1.14894e-11	9.61906e-10	48.0574	45.6573	43.3333	708.665	271	1387.41
Glyma.17G151700.Wm82.a2.v1	813.15	5.3784	1.2095e-11	1.01025e-09	33.7546	42.5793	37	2465.64	443	710.626
Glyma.14G156200.Wm82.a2.v1	3797.36	3.69261	1.29021e-11	1.07514e-09	549.228	541.218	493.333	6686.42	2335	7412.59
Glyma.08G020700.Wm82.a2.v1	86.5075	5.9554	1.29933e-11	1.08022e-09	4.00479	1.53901	2	189.1	48.5	151.386
Glyma.12G195600.Wm82.a2.v1	290.989	-10.7729	1.43708e-11	1.19198e-09	590.42	573.538	515.333	0	0	0
Glyma.02G232500.Wm82.a2.v1	713.05	5.26267	1.5491e-11	1.28191e-09	35.471	36.9362	31.3333	642.572	384	2137.22
Glyma.17G127900.Wm82.a2.v1	362.812	5.58891	1.5745e-11	1.29993e-09	12.5865	16.9291	16.6667	313.942	203	1107.79
Glyma.15G014400.Wm82.a2.v1	7560.91	4.08355	1.59969e-11	1.31768e-09	827.274	857.229	773.333	18063.6	4018.5	10495.5
Glyma.18G118300.Wm82.a2.v1	464.568	6.29944	1.60902e-11	1.32232e-09	12.0144	11.2861	11	1566.04	248	268.933
Glyma.13G095100.Wm82.a2.v1	173.115	4.46726	1.67475e-11	1.37318e-09	17.1634	12.8251	15.6667	295.583	86	366.889
Glyma.09G162700.Wm82.a2.v1	18290.2	4.98266	1.68408e-11	1.37767e-09	1113.33	1129.63	786.667	53640.1	9910.5	17277.6
Glyma.06G132900.Wm82.a2.v1	816.269	3.81863	1.71726e-11	1.4016e-09	115.567	100.549	97	1424.67	429	1624.29
Glyma.04G227600.Wm82.a2.v1	96.9513	5.11994	1.74458e-11	1.42066e-09	5.72112	5.13003	5.33333	157.889	53.5	219.065
Glyma.09G087400.Wm82.a2.v1	156.983	4.66191	1.80332e-11	1.46516e-09	12.5865	11.2861	10.3333	367.184	92	236.875
Glyma.18G119800.Wm82.a2.v1	80.1484	5.3736	1.8554e-11	1.50405e-09	3.43267	4.10403	2.33333	165.233	46	147.824
Glyma.06G012600.Wm82.a2.v1	1845.53	-4.12615	1.94435e-11	1.5726e-09	3548.81	3433.53	3168.67	146.874	64	252.904
Glyma.09G277900.Wm82.a2.v1	201.183	-5.4383	1.9728e-11	1.592e-09	383.315	403.221	370.667	12.8514	4	5.34305
Glyma.17G064900.Wm82.a2.v1	2460.23	3.82017	1.99228e-11	1.6041e-09	319.239	331.4	289	3879.3	1345.5	5310.99
Glyma.09G163000.Wm82.a2.v1	20264	5.16524	2.00622e-11	1.61169e-09	1141.36	1056.27	1005.67	61352.7	11113.5	17505.6
Glyma.04G184000.Wm82.a2.v1	516.163	-6.0353	2.02089e-11	1.61984e-09	1037.81	995.739	961.333	27.5388	4	3.56203
Glyma.11G030500.Wm82.a2.v1	6263.29	3.88757	2.04034e-11	1.63177e-09	758.621	826.961	763.333	14026.4	3284.5	9441.17
Glyma.11G090200.Wm82.a2.v1	270.022	-8.21349	2.09583e-11	1.67241e-09	562.386	514.029	509.667	3.67184	1	0
Glyma.01G103300.Wm82.a2.v1	308.79	5.97174	2.26642e-11	1.8045e-09	8.58168	10.7731	10.3333	991.396	217	224.408
Glyma.02G108300.Wm82.a2.v1	30690.9	4.16133	2.34716e-11	1.86464e-09	3298.23	3199.6	3104	75854.7	16387	40411.3
Glyma.05G139800.Wm82.a2.v1	73.1149	7.4919	2.37466e-11	1.8823e-09	0.572112	1.02601	1	137.694	44	153.167
Glyma.12G150500.Wm82.a2.v1	54581.8	5.08522	2.39214e-11	1.88961e-09	3128.31	3119.06	2988.33	48297.5	29801.5	163782
Glyma.13G032700.Wm82.a2.v1	254.359	4.13205	2.39445e-11	1.88961e-09	24.6008	30.2672	20.6667	444.292	139	518.276
Glyma.01G045700.Wm82.a2.v1	1854.32	3.90021	2.42151e-11	1.90256e-09	241.431	224.182	246.667	2810.79	1054.5	4140.86
Glyma.16G039200.Wm82.a2.v1	183.842	-6.32302	2.4195e-11	1.90256e-09	355.854	370.388	0	7.34368	0	1.78102
Glyma.15G154700.Wm82.a2.v1	281.482	-4.70921	2.43375e-11	1.90798e-09	566.391	518.133	514	14.6874	4.5	26.7152
Glyma.14G091400.Wm82.a2.v1	227.397	5.27622	2.48029e-11	1.94022e-09	13.1586	9.74706	14.3333	646.244	126	240.437
Glyma.09G234200.Wm82.a2.v1	548.698	-4.26055	2.5115e-11	1.96034e-09	1013.21	1072.69	1013.67	67.929	17.5	40.9634
Glyma.03G213900.Wm82.a2.v1	238.268	5.12781	2.63906e-11	2.05542e-09	13.1586	13.3381	112.333	670.111	265	256.466
Glyma.17G086400.Wm82.a2.v1	276.511	6.44007	2.67698e-11	2.08042e-09	8.00957	4.61703	6.33333	174.412	155.5	919.004
Glyma.13G275400.Wm82.a2.v1	163.276	-6.15617	2.68557e-11	2.08257e-09	305.508	338.582	289.667	3.67184	1.5	5.34305
Glyma.19G006200.Wm82.a2.v1	328.332	-6.69518	2.69887e-11	2.08835e-09	664.222	636.637	624.333	0	1.5	12.4671
Glyma.05G225500.Wm82.a2.v1	420.965	4.03358	2.80095e-11	2.16266e-09	49.2016	47.7093	48.6667	657.259	257	929.691
Glyma.17G124000.Wm82.a2.v1	175.599	-6.58319	2.90985e-11	2.2419e-09	352.421	342.686	337.333	5.50776	0.5	1.78102
Glyma.06G037000.Wm82.a2.v1	2708.08	3.88502	3.02782e-11	2.32778e-09	345.556	341.147	324.333	6106.27	1470.5	4039.35
Glyma.13G123000.Wm82.a2.v1	289.579	5.19471	3.23619e-11	2.48263e-09	14.8749	15.9031	12.3333	839.015	165	288.525
Glyma.14G106700.Wm82.a2.v1	153.551	6.11777	3.3027e-11	2.52823e-09	5.14901	3.59102	3.66667	473.667	81	131.795
Glyma.15G073200.Wm82.a2.v1	29849.3	5.12313	3.41694e-11	2.61009e-09	1702.61	1627.76	1570.33	25477.1	16669	90589.6
Glyma.19G051500.Wm82.a2.v1	6757.25	3.5888	3.4611e-11	2.63818e-09	1047.54	1026.52	944.333	12842.3	3572	12112.7
Glyma.19G190400.Wm82.a2.v1	177.187	4.68649	3.46882e-11	2.63844e-09	13.1586	13.3381	12.6667	242.341	99	439.911
Glyma.14G211300.Wm82.a2.v1	18648.8	4.92022	3.51742e-11	2.66973e-09	1215.74	1169.13	1095	54752.6	10085	17457.5
Glyma.U029900.Wm82.a2.v1	6286.59	3.63165	3.55174e-11	2.69007e-09	935.975	941.361	878.333	12627.5	3358	10641.6
Glyma.07G051900.Wm82.a2.v1	163.429	-6.15441	3.66071e-11	2.76674e-09	286.056	358.589	305	5.50776	2.5	3.56203
Glyma.02G305600.Wm82.a2.v1	2369.58	5.29198	3.74868e-11	2.82725e-09	118.427	117.478	107.333	7349.18	1308.5	1893.22
Glyma.13G087400.Wm82.a2.v1	5011.55	4.64606	3.76288e-11	2.83198e-09	395.902	373.979	364.333	13949.3	2722	5327.02
Glyma.08G211000.Wm82.a2.v1	13842	4.17366	3.88771e-11	2.91978e-09	1502.37	1404.6	1370	34640.1	7319	17820.8
Glyma.19G091800.Wm82.a2.v1	332.902	-4.45581	4.04061e-11	3.02826e-09	637.905	635.611	585.333	36.7184	8	21.3722
Glyma.13G279200.Wm82.a2.v1	46187.2	3.56301	4.06111e-11	3.03725e-09	7399.13	7013.27	6624	83618.8	23636	86717.7
Glyma.06G310100.Wm82.a2.v1	471.965	6.20159	4.12155e-11	3.07602e-09	11.4422	13.8511	15.6667	1595.41	269.5	267.152
Glyma.06G141700.Wm82.a2.v1	2221.65	3.64374	4.21568e-11	3.13971e-09	354.137	304.211	310.667	3989.45	1190.5	4238.82
Glyma.17G251100.Wm82.a2.v1	8934.31	3.68843	4.33623e-11	3.22279e-09	1263.8	1308.67	1220	14309.2	4749	18855.6
Glyma.16G206900.Wm82.a2.v1	177.974	5.61418	4.62074e-11	3.42711e-09	9.15379	5.13003	5.66667	517.729	100.5	179.883
Glyma.07G266900.Wm82.a2.v1	1579.65	3.63059	4.66855e-11	3.4554e-09	239.143	232.903	218.667	3078.84	900.5	2767.7
Glyma.20G197100.Wm82.a2.v1	1852.49	4.833	4.73317e-11	3.496e-09	132.158	119.017	111.333	5329.67	1004	1829.1
Glyma.11G023200.Wm82.a2.v1	11406.9	4.96227	5.16862e-11	3.80975e-09	722.006	696.145	642.333	33920.4	6261.5	10288.9
Glyma.05G101300.Wm82.a2.v1	944.279	3.97018	5.21394e-11	3.83525e-09	117.283	109.27	107.333	2177.4	514.5	1373.16
Glyma.05G219100.Wm82.a2.v1	156.553	6.99853	5.23935e-11	3.84603e-09	2.28845	2.56502	2.66667	528.745	85.5	92.6129
Glyma.02G021600.Wm82.a2.v1	8601.23	3.56287	5.60169e-11	4.10358e-09	1371.92	1312.26	1290.33	16703.2	4513.5	15017.5
Glyma.11G250500.Wm82.a2.v1	24724.2	4.5338	5.62878e-11	4.10708e-09	2150.57	1942.23	1883	26938.4	13122.5	67865.6
Glyma.14G199900.Wm82.a2.v1	850.061	5.83235	5.62944e-11	4.10708e-09	31.4662	27.1892	24	2812.63	437	528.962
Glyma.09G140800.Wm82.a2.v1	3945.1	3.55335	5.83333e-11	4.24716e-09	613.304	625.351	609.333	7376.72	2035	7165.03
Glyma.08G300700.Wm82.a2.v1	318.839	-4.25676	5.85986e-11	4.25238e-09	597.857	614.065	541.333	36.7184	13	26.7152
Glyma.19G182300.Wm82.a2.v1	181.695	-5.14792	5.86429e-11	4.25238e-09	371.301	335.504	325.667	12.8514	2.5	7.12407
Glyma.03G220000.Wm82.a2.v1	423.946	4.16504	5.89672e-11	4.26724e-09	47.4853	42.0663	46	1004.25	232.5	601.984
Glyma.01G005400.Wm82.a2.v1	2598.24	3.57997	5.93962e-11	4.28961e-09	409.06	392.961	372.667	5008.39	1389.5	4582.56
Glyma.13G095000.Wm82.a2.v1	37453.7	5.98083	5.98387e-11	4.31285e-09	1206.58	1128.61	1079	19495.6	21320.5	127984
Glyma.04G235900.Wm82.a2.v1	164.321	-6.49337	6.02518e-11	4.33389e-09	314.09	336.017	317.667	1.83592	0.5	5.34305
Glyma.01G216000.Wm82.a2.v1	72.6628	5.33498	6.14118e-11	4.40845e-09	3.43267	3.59102	6	134.022	43.5	149.605
Glyma.01G206700.Wm82.a2.v1	331.218	3.85579	6.30839e-11	4.51941e-09	44.0526	41.5533	42	644.408	178.5	594.859
Glyma.09G147400.Wm82.a2.v1	1699.34	4.45079	6.4118e-11	4.58431e-09	151.038	146.206	134.333	1946.07	991	4554.06
Glyma.09G173200.Wm82.a2.v1	33809.7	4.2893	6.4337e-11	4.59079e-09	3334.84	3245.26	3075.33	40434.3	18120.5	88224.4
Glyma.04G003100.Wm82.a2.v1	145.785	6.48843	6.51909e-11	4.63559e-09	2.28845	4.10403	2.66667	466.323	91.5	110.423
Glyma.06G101400.Wm82.a2.v1	1682.34	3.58392	6.52243e-11	4.63559e-09	251.729	266.249	265.333	3130.24	879	3081.16
Glyma.18G082200.Wm82.a2.v1	230.726	-4.61274	6.6223e-11	4.69724e-09	428.512	458.112	421.333	22.031	4	14.2481
Glyma.07G048900.Wm82.a2.v1	369.94	-4.70864	6.64145e-11	4.70149e-09	725.438	699.736	682	38.5543	6.5	16.0291
Glyma.18G236700.Wm82.a2.v1	282.932	-5.95529	6.72164e-11	4.74048e-09	562.386	551.479	538.333	1.83592	1.5	16.0291
Glyma.20G021900.Wm82.a2.v1	2894.45	3.55814	6.72305e-11	4.74048e-09	462.267	443.748	462	5179.13	1951	5492.65
Glyma.11G185700.Wm82.a2.v1	356.451	-4.4337	6.90728e-11	4.8608e-09	692.828	669.982	673.667	22.031	8	40.9634
Glyma.10G046500.Wm82.a2.v1	4947.22	7.20348	6.92892e-11	4.86644e-09	74.3746	58.9954	70	1138.27	2915	18517.2
Glyma.06G260800.Wm82.a2.v1	180.376	-5.60559	6.99813e-11	4.90541e-09	342.695	364.232	318	11.0155	1	3.56203
Glyma.08G316200.Wm82.a2.v1	625.797	5.48713	7.27011e-11	5.08609e-09	26.8893	27.7022	123.667	466.323	419	1982.27
Glyma.15G174300.Wm82.a2.v1	337.689	4.4109	7.68671e-11	5.36704e-09	30.8941	29.7542	48.3333	855.538	283.5	434.568
Glyma.15G129100.Wm82.a2.v1	3204.65	-5.04285	8.02376e-11	5.59145e-09	6218.86	6222.22	6871.33	295.583	59.5	81.9268
Glyma.01G217500.Wm82.a2.v1	977.257	7.34889	8.55532e-11	5.95028e-09	6.86535	16.9291	11.6667	266.208	603	3619.03
Glyma.17G245000.Wm82.a2.v1	517.581	-3.98865	8.63908e-11	5.99686e-09	936.548	1011.13	900.333	51.4057	16.5	71.2407
Glyma.03G103600.Wm82.a2.v1	1191.26	3.906	8.99772e-11	6.23371e-09	153.326	144.667	150.333	2748.37	801.5	1718.68
Glyma.09G269400.Wm82.a2.v1	187.375	4.06885	9.18879e-11	6.35377e-09	20.596	21.5461	18	367.184	97.5	340.174
Glyma.03G150700.Wm82.a2.v1	3571.26	3.51545	9.3719e-11	6.46787e-09	572.112	576.616	532.333	6535.87	1963	6600.45
Glyma.13G085800.Wm82.a2.v1	138.217	5.50279	9.44433e-11	6.5053e-09	6.29323	5.64304	4.66667	400.23	78	140.7
Glyma.08G192900.Wm82.a2.v1	146.939	-6.00179	9.75493e-11	6.70633e-09	298.643	280.1	299	3.67184	0.5	5.34305
Glyma.15G232200.Wm82.a2.v1	244.91	5.24565	9.88435e-11	6.78226e-09	15.447	9.74706	10	708.665	137	245.78
Glyma.06G136000.Wm82.a2.v1	479.007	3.91207	9.98112e-11	6.83554e-09	62.9323	56.4304	54	1059.33	263	737.341
Glyma.20G213700.Wm82.a2.v1	951.453	-3.96813	1.05482e-10	7.21011e-09	1842.2	1734.98	1678	141.366	37	87.2698
Glyma.19G194700.Wm82.a2.v1	744.777	4.0939	1.075e-10	7.334e-09	75.5188	89.2626	81.3333	1797.36	441.5	1016.96
Glyma.07G156200.Wm82.a2.v1	835.185	5.09318	1.10809e-10	7.54533e-09	51.4901	43.6053	44	2522.55	460.5	723.093
Glyma.01G103500.Wm82.a2.v1	970.107	-3.71592	1.11231e-10	7.55094e-09	1783.85	1822.19	1670.33	123.007	32	151.386
Glyma.18G071700.Wm82.a2.v1	125.567	4.46307	1.11314e-10	7.55094e-09	12.5865	9.23406	11.3333	223.982	77.5	256.466
Glyma.11G070500.Wm82.a2.v1	172.399	-4.94177	1.12506e-10	7.61735e-09	346.7	321.14	323	12.8514	4.5	8.90508
Glyma.13G254900.Wm82.a2.v1	3961.28	4.2142	1.1937e-10	8.06683e-09	402.195	407.838	400	10235.2	2210	4799.84
Glyma.07G262500.Wm82.a2.v1	678.081	-3.82589	1.22364e-10	8.24704e-09	1260.94	1272.76	1213.33	77.1086	26.5	101.518
Glyma.13G223100.Wm82.a2.v1	156.022	-6.41066	1.22498e-10	8.24704e-09	324.388	292.412	282.667	5.50776	2	1.78102
Glyma.04G087400.Wm82.a2.v1	661.668	3.69083	1.2636e-10	8.49108e-09	88.1053	102.088	87.3333	1325.53	352.5	1130.95
Glyma.04G228400.Wm82.a2.v1	3068.33	5.43101	1.32231e-10	8.86893e-09	139.023	139.024	142.667	2089.28	1715.5	9906.01
Glyma.07G139700.Wm82.a2.v1	8375.86	5.1912	1.33343e-10	8.92672e-09	456.545	436.053	527	26218.8	5372	6392.07
Glyma.05G091100.Wm82.a2.v1	7147.65	3.56806	1.35242e-10	9.03694e-09	1130.49	1092.7	1055.33	11595.7	3754	14771.7
Glyma.02G255400.Wm82.a2.v1	1921.86	5.24145	1.35819e-10	9.05858e-09	93.8264	104.14	86	6025.49	1041	1464
Glyma.06G088400.Wm82.a2.v1	1829.92	4.04156	1.38421e-10	9.2149e-09	207.677	211.357	3764	4499.84	3002	2400.81
Glyma.15G072400.Wm82.a2.v1	59969.4	3.48004	1.39876e-10	9.29445e-09	10029.7	9699.87	9015.67	116498	30886	103650
Glyma.20G009800.Wm82.a2.v1	2973.19	3.66125	1.40427e-10	9.3138e-09	442.815	428.358	399.667	4608.16	1555	6413.44
Glyma.12G053800.Wm82.a2.v1	1054.36	-7.19551	1.41917e-10	9.39514e-09	2068.19	2120.76	1958	0	4.5	28.4963
Glyma.08G161000.Wm82.a2.v1	13856.4	3.52702	1.43751e-10	9.49897e-09	2186.04	2238.23	2074.33	22932.5	7513.5	28068.8
Glyma.06G091100.Wm82.a2.v1	165.667	7.04502	1.46518e-10	9.66397e-09	4.00479	1.02601	1.66667	550.776	94.5	106.861
Glyma.01G098300.Wm82.a2.v1	190.858	5.15721	1.50855e-10	9.9317e-09	13.1586	7.69505	14	532.417	94	210.16
Glyma.03G132500.Wm82.a2.v1	431.281	3.77525	1.51271e-10	9.94079e-09	53.7785	63.6124	88.6667	875.733	334.5	731.998
Glyma.14G012700.Wm82.a2.v1	424.518	4.57562	1.56014e-10	1.02336e-08	36.0431	32.3192	37	479.175	254.5	1150.54
Glyma.11G250400.Wm82.a2.v1	17923.9	4.84513	1.56402e-10	1.02403e-08	1185.99	1224.54	1075.67	16022.1	9414.5	53263.1
Glyma.02G080900.Wm82.a2.v1	368.637	-5.09689	1.59622e-10	1.0432e-08	712.852	719.744	668	33.0465	5.5	8.90508
Glyma.11G010400.Wm82.a2.v1	195.371	-4.52415	1.65866e-10	1.08006e-08	356.998	391.935	328.333	16.5233	4.5	16.0291
Glyma.13G030900.Wm82.a2.v1	10895.7	3.78363	1.65671e-10	1.08006e-08	1486.35	1464.11	1410	15557.6	5761	25074.9
Glyma.13G355700.Wm82.a2.v1	358.521	4.47765	1.69118e-10	1.09923e-08	35.471	26.1632	31	928.975	172	443.473
Glyma.08G100700.Wm82.a2.v1	2694.66	4.22993	1.75102e-10	1.13607e-08	273.47	271.892	264.667	3201.84	1696.5	7031.45
Glyma.02G145300.Wm82.a2.v1	29234.5	3.44352	1.83306e-10	1.18714e-08	4849.22	4994.6	4109	55327.3	13661.5	51767
Glyma.13G267100.Wm82.a2.v1	142.343	-5.45745	1.85205e-10	1.19511e-08	283.768	272.918	275.333	7.34368	2.5	5.34305
Glyma.13G369900.Wm82.a2.v1	206.851	4.68338	1.85003e-10	1.19511e-08	17.1634	13.8511	17.6667	545.268	111	251.123
Glyma.06G104800.Wm82.a2.v1	187.403	-5.85571	1.86825e-10	1.20339e-08	363.863	372.953	333.333	11.0155	1.5	1.78102
Glyma.02G006200.Wm82.a2.v1	771.105	3.61753	1.88516e-10	1.2121e-08	124.148	108.244	115.667	1331.04	385.5	1520.99
Glyma.07G053100.Wm82.a2.v1	338.176	5.59467	1.92898e-10	1.23805e-08	12.0144	15.3901	10	1079.52	182.5	245.78
Glyma.14G211700.Wm82.a2.v1	230.914	-4.85407	1.96301e-10	1.25763e-08	442.815	449.904	430.333	22.031	6	8.90508
Glyma.06G085700.Wm82.a2.v1	195.943	-10.2024	1.97124e-10	1.26064e-08	391.325	392.448	383.333	0	0	0
Glyma.10G036800.Wm82.a2.v1	106.138	6.10979	2.09121e-10	1.33498e-08	4.5769	1.53901	2	115.663	66.5	302.773
Glyma.04G211900.Wm82.a2.v1	493.556	4.987	2.13443e-10	1.36014e-08	33.1825	27.1892	33.6667	451.636	269.5	1462.21
Glyma.01G087400.Wm82.a2.v1	707.467	3.88766	2.16047e-10	1.37428e-08	94.9706	84.1325	92.6667	1628.46	453	1022.3
Glyma.11G071200.Wm82.a2.v1	531.251	3.955	2.20128e-10	1.39775e-08	64.0766	64.6384	63.3333	1242.92	291.5	753.37
Glyma.03G214300.Wm82.a2.v1	2198.56	3.64175	2.21705e-10	1.40368e-08	345.556	306.776	284.667	3423.99	1145.5	4717.91
Glyma.04G234900.Wm82.a2.v1	6965.32	3.51014	2.21902e-10	1.40368e-08	1117.91	1130.15	1051.67	11390	3715	14223.2
Glyma.17G054200.Wm82.a2.v1	740.337	3.78958	2.2224e-10	1.40368e-08	105.841	93.8796	94.3333	1643.15	405.5	1118.48
Glyma.08G348300.Wm82.a2.v1	329.56	-3.99443	2.27876e-10	1.43674e-08	605.295	635.098	721	42.2261	16	35.6203
Glyma.05G137800.Wm82.a2.v1	129.926	5.17902	2.29865e-10	1.44673e-08	5.72112	8.20805	7	356.168	61	149.605
Glyma.13G359500.Wm82.a2.v1	6781.55	3.45818	2.30557e-10	1.44854e-08	1101.89	1160.41	1020.67	11643.4	3634.5	13220.5
Glyma.09G279100.Wm82.a2.v1	190.517	-10.1618	2.36686e-10	1.48444e-08	379.882	382.187	369	0	0	0
Glyma.20G053700.Wm82.a2.v1	210.263	10.6057	2.42567e-10	1.51866e-08	0	0.513003	0.666667	651.751	119	188.788
Glyma.08G005900.Wm82.a2.v1	306.978	-3.99776	2.47464e-10	1.54661e-08	588.703	566.869	562.333	36.7184	10	35.6203
Glyma.15G011200.Wm82.a2.v1	87.8883	5.64026	2.49184e-10	1.55464e-08	1.71634	5.13003	3.66667	211.131	44	133.576
Glyma.06G028000.Wm82.a2.v1	182.949	-5.82039	2.52409e-10	1.57201e-08	355.282	363.719	349.667	11.0155	1	1.78102
Glyma.05G161600.Wm82.a2.v1	732.52	3.54963	2.78145e-10	1.72929e-08	121.288	109.27	105	1353.07	389	1346.45
Glyma.13G352800.Wm82.a2.v1	237.515	-6.42456	2.79074e-10	1.73205e-08	454.257	484.788	439	11.0155	1.5	0
Glyma.14G061100.Wm82.a2.v1	950.149	-3.71921	2.80509e-10	1.73794e-08	1785.56	1746.78	1667.33	156.053	35	112.204
Glyma.07G180100.Wm82.a2.v1	168.985	-4.79764	2.82745e-10	1.74876e-08	332.397	320.114	302.667	9.1796	3	14.2481
Glyma.09G277800.Wm82.a2.v1	144.417	-5.10957	2.84707e-10	1.75483e-08	284.912	276.509	251	7.34368	2	8.90508
Glyma.17G139700.Wm82.a2.v1	186.059	-10.1277	2.84364e-10	1.75483e-08	351.277	392.961	357.333	0	0	0
Glyma.02G155500.Wm82.a2.v1	654.749	3.54983	2.86035e-10	1.75942e-08	102.408	103.627	95.3333	1180.5	308.5	1232.46
Glyma.18G091800.Wm82.a2.v1	149.418	-6.7687	2.86437e-10	1.75942e-08	290.061	302.159	278.333	3.67184	1	1.78102
Glyma.17G140400.Wm82.a2.v1	415.185	-3.81267	2.96409e-10	1.81755e-08	785.51	764.888	728	56.9135	16	53.4305
Glyma.17G040000.Wm82.a2.v1	137.361	-5.40485	3.01498e-10	1.84559e-08	274.614	262.145	260	7.34368	1	5.34305
Glyma.01G132000.Wm82.a2.v1	250.108	-5.7744	3.03951e-10	1.8511e-08	493.161	489.405	466	1.83592	2.5	16.0291
Glyma.15G019200.Wm82.a2.v1	390.581	-6.55537	3.03349e-10	1.8511e-08	775.784	770.018	713.667	16.5233	4	0
Glyma.17G169700.Wm82.a2.v1	6798	3.67122	3.03609e-10	1.8511e-08	982.889	996.252	940.333	9972.71	3663	15240.2
Glyma.U035700.Wm82.a2.v1	135.503	-5.61354	3.11073e-10	1.89125e-08	240.287	290.873	232	5.50776	1	5.34305
Glyma.06G255900.Wm82.a2.v1	144.664	-6.30031	3.18267e-10	1.9317e-08	262.027	309.341	259.333	5.50776	1.5	1.78102
Glyma.01G089800.Wm82.a2.v1	231.417	3.89705	3.20118e-10	1.93965e-08	32.6104	25.6502	26.3333	418.59	127.5	448.816
Glyma.14G179900.Wm82.a2.v1	337.774	-4.21715	3.25396e-10	1.96829e-08	646.487	635.611	582	44.0621	8	24.9342
Glyma.12G119900.Wm82.a2.v1	113.131	4.69797	3.44635e-10	2.08114e-08	8.58168	8.20805	10.3333	277.224	71.5	158.51
Glyma.13G079900.Wm82.a2.v1	3043.08	3.74676	3.50708e-10	2.11424e-08	411.921	431.949	390.333	7007.7	1700.5	4320.75
Glyma.07G150400.Wm82.a2.v1	137.548	-5.4068	3.59738e-10	2.16503e-08	291.777	245.729	246	7.34368	1	5.34305
Glyma.13G152600.Wm82.a2.v1	1133.53	4.22294	3.7171e-10	2.23332e-08	110.418	120.043	123.333	1334.71	708	2968.95
Glyma.02G142200.Wm82.a2.v1	149.297	-5.16143	3.87234e-10	2.32269e-08	290.633	290.36	296	5.50776	2.5	10.6861
Glyma.11G029900.Wm82.a2.v1	118.593	7.45218	3.9525e-10	2.3668e-08	1.14422	1.53901	2.33333	407.574	66.5	64.1166
Glyma.01G006000.Wm82.a2.v1	6207.56	3.43742	4.1423e-10	2.47631e-08	1088.73	1009.59	976.333	12355.7	3225.5	10376.2
Glyma.15G062300.Wm82.a2.v1	174.478	-10.035	4.21121e-10	2.5133e-08	339.835	358.076	319.333	0	0	0
Glyma.14G056200.Wm82.a2.v1	4257.04	5.00403	4.25366e-10	2.5344e-08	248.869	265.736	242.667	3334.03	2350.5	13179.5
Glyma.20G206300.Wm82.a2.v1	330.41	-3.89523	4.48148e-10	2.6657e-08	635.617	602.779	588	44.0621	15	39.1824
Glyma.13G117700.Wm82.a2.v1	40674.9	4.10217	4.53802e-10	2.69485e-08	4606.07	4346.16	4034.67	48154.3	21266.5	105593
Glyma.10G188400.Wm82.a2.v1	207.034	-4.52601	4.55428e-10	2.70002e-08	377.594	416.046	357.333	22.031	6	12.4671
Glyma.10G285400.Wm82.a2.v1	83.4309	6.27087	4.67445e-10	2.76667e-08	1.14422	3.07802	2	238.669	45.5	90.8318
Glyma.02G042500.Wm82.a2.v1	6672.86	5.17313	4.98838e-10	2.9476e-08	328.392	391.422	322.333	21230.6	3695.5	4741.07
Glyma.13G186200.Wm82.a2.v1	261.755	5.19363	5.0453e-10	2.97631e-08	16.5913	11.2861	14.6667	787.609	144	231.532
Glyma.04G225900.Wm82.a2.v1	442.566	-4.45243	5.27004e-10	3.10377e-08	850.159	842.864	744.667	22.031	11.5	55.2115
Glyma.08G278900.Wm82.a2.v1	149.445	4.57539	5.34043e-10	3.14005e-08	14.8749	9.23406	15.6667	363.512	79	210.16
Glyma.09G063300.Wm82.a2.v1	2117.96	3.99435	5.47869e-10	3.21606e-08	268.321	231.877	223.333	5294.79	1122	2676.87
Glyma.09G138300.Wm82.a2.v1	318.988	6.30266	5.66581e-10	3.32044e-08	10.8701	5.13003	9	1097.88	201	162.072
Glyma.03G162900.Wm82.a2.v1	3797.45	3.64789	5.75379e-10	3.36649e-08	584.127	538.14	509.667	8551.71	1944	5515.81
Glyma.08G180100.Wm82.a2.v1	3075.97	6.06913	5.82834e-10	3.40453e-08	89.2495	91.3146	67.6667	1248.43	1848.5	10874.9
Glyma.11G063500.Wm82.a2.v1	1815.97	3.45277	5.91911e-10	3.45191e-08	327.82	280.1	267.667	3106.38	937	3549.57
Glyma.10G107900.Wm82.a2.v1	375.766	5.57968	5.939e-10	3.45787e-08	14.8749	15.9031	12.3333	1230.07	191.5	242.218
Glyma.13G141900.Wm82.a2.v1	183.307	-7.6522	6.02179e-10	3.50037e-08	358.142	371.414	339.667	3.67184	0.5	0
Glyma.15G146100.Wm82.a2.v1	154.97	4.95757	6.06895e-10	3.52206e-08	8.00957	11.2861	8.66667	429.605	82	170.978
Glyma.09G179900.Wm82.a2.v1	247.425	-5.73664	6.27811e-10	3.63754e-08	509.18	462.216	451.333	16.5233	2	1.78102
Glyma.12G008300.Wm82.a2.v1	2392.58	3.50154	6.3497e-10	3.67306e-08	379.882	396.552	355.333	5035.93	1268.5	3757.94
Glyma.11G132200.Wm82.a2.v1	689.694	3.97106	6.50219e-10	3.7552e-08	81.2399	84.1325	81.3333	901.436	367	1691.97
Glyma.06G018700.Wm82.a2.v1	1927.62	3.45081	6.58901e-10	3.7992e-08	334.686	311.393	356	3901.33	1027.5	3163.09
Glyma.14G061200.Wm82.a2.v1	1160.47	4.50144	6.70379e-10	3.85916e-08	97.2591	99.0096	96.6667	3282.62	627.5	1163
Glyma.14G121200.Wm82.a2.v1	24094.1	3.98337	6.76187e-10	3.8801e-08	2842.83	2888.21	2660.33	29442.6	12972.5	61202.8
Glyma.20G234300.Wm82.a2.v1	738.37	3.84138	6.75731e-10	3.8801e-08	91.5379	101.062	89.3333	1022.61	413	1738.27
Glyma.06G046400.Wm82.a2.v1	3498.79	8.40676	6.94491e-10	3.97874e-08	20.596	20.5201	20	170.74	2020	13783.3
Glyma.17G238200.Wm82.a2.v1	944.783	-3.87323	7.07848e-10	4.04878e-08	1802.15	1735.49	1682.67	154.217	38	87.2698
Glyma.11G126100.Wm82.a2.v1	1920.62	3.41899	7.18249e-10	4.1017e-08	314.662	342.173	343.333	3796.68	1164	3228.98
Glyma.05G082500.Wm82.a2.v1	2921.91	3.4147	7.25269e-10	4.13096e-08	492.589	509.412	482	5880.45	1493.5	4805.18
Glyma.10G007000.Wm82.a2.v1	1477.74	5.16426	7.25682e-10	4.13096e-08	87.5332	72.8465	92.3333	4694.45	823	1056.14
Glyma.07G129000.Wm82.a2.v1	3066.75	3.92883	7.34347e-10	4.16701e-08	369.012	386.804	353	7639.26	1621.5	3871.93
Glyma.11G034300.Wm82.a2.v1	281.476	11.0289	7.3365e-10	4.16701e-08	0	0.513003	0.666667	111.991	138	1013.4
Glyma.18G141900.Wm82.a2.v1	223.506	-5.09229	7.35889e-10	4.16914e-08	456.545	411.942	400.333	20.1951	5	5.34305
Glyma.07G021300.Wm82.a2.v1	15246.2	3.45174	7.40879e-10	4.19077e-08	2557.34	2549.63	2431.67	31987.2	7932	23890.6
Glyma.11G098100.Wm82.a2.v1	150.617	-5.76238	7.55537e-10	4.26693e-08	298.07	293.438	307.667	9.1796	1	1.78102
Glyma.18G030700.Wm82.a2.v1	158.856	-9.89964	7.65812e-10	4.31814e-08	320.955	314.471	293.667	0	0	0
Glyma.06G102300.Wm82.a2.v1	289.71	-4.19823	8.10815e-10	4.5647e-08	541.79	557.122	515.333	38.5543	10	21.3722
Glyma.04G251000.Wm82.a2.v1	165.845	-5.30656	8.13859e-10	4.56745e-08	343.267	303.698	298.667	12.8514	3	3.56203
Glyma.09G232900.Wm82.a2.v1	406.035	3.55501	8.13772e-10	4.56745e-08	60.6439	66.6904	56.3333	739.875	192.5	756.932
Glyma.03G257400.Wm82.a2.v1	59.2514	5.73556	8.36952e-10	4.68969e-08	2.86056	1.53901	3.33333	95.4678	31.5	137.138
Glyma.10G109400.Wm82.a2.v1	823.568	3.54958	8.3871e-10	4.69218e-08	125.293	133.894	142.333	1734.94	477.5	1300.14
Glyma.13G242800.Wm82.a2.v1	163.691	-6.47601	8.62866e-10	4.81978e-08	327.82	319.601	303.333	7.34368	0.5	0
Glyma.11G120200.Wm82.a2.v1	609.777	-4.74949	8.66677e-10	4.83352e-08	1216.31	1135.28	1165	67.929	11	19.5912
Glyma.01G024600.Wm82.a2.v1	1056.9	4.11326	8.83938e-10	4.9221e-08	109.846	121.069	117	2742.86	578	1253.84
Glyma.15G052700.Wm82.a2.v1	1450.35	-4.33996	9.11976e-10	5.07033e-08	2837.1	2691.22	2547.33	198.279	33.5	74.8027
Glyma.10G170900.Wm82.a2.v1	1294.69	5.55013	9.20215e-10	5.10819e-08	54.3507	53.8653	45	4347.46	730.5	723.093
Glyma.03G068100.Wm82.a2.v1	592.789	5.13745	9.3812e-10	5.19951e-08	28.0335	37.4492	31.6667	451.636	341.5	1854.04
Glyma.09G162800.Wm82.a2.v1	1221.56	4.08862	9.60348e-10	5.31447e-08	132.73	138.511	102.333	3168.8	689.5	1446.19
Glyma.08G042100.Wm82.a2.v1	421.211	3.72974	9.92583e-10	5.48437e-08	60.6439	57.4564	66.3333	934.483	235	632.261
Glyma.09G256100.Wm82.a2.v1	363.362	-9.64781	9.96582e-10	5.49796e-08	738.025	713.588	693	1.83592	0.5	0
Glyma.15G167300.Wm82.a2.v1	3835.24	4.48314	9.98463e-10	5.49985e-08	327.248	329.348	300.667	3688.36	2104	10996
Glyma.16G217500.Wm82.a2.v1	3823.34	3.31476	1.01352e-09	5.57422e-08	707.131	689.476	715	6831.46	2129	7065.29
Glyma.15G015800.Wm82.a2.v1	194.444	-4.28176	1.0161e-09	5.57979e-08	377.022	362.693	340	22.031	4.5	16.0291
Glyma.03G005900.Wm82.a2.v1	1865.34	3.47761	1.05097e-09	5.76247e-08	308.368	306.263	299.667	3947.23	985.5	2899.49
Glyma.10G020600.Wm82.a2.v1	1435.14	3.89305	1.07201e-09	5.8688e-08	172.206	189.811	190.333	1841.43	798	3537.1
Glyma.12G129900.Wm82.a2.v1	974.629	3.71465	1.08246e-09	5.91695e-08	138.451	137.485	117.667	1369.6	511	2252.99
Glyma.13G085900.Wm82.a2.v1	140.178	4.88602	1.10122e-09	6.01032e-08	8.58168	9.74706	11.3333	389.215	73	153.167
Glyma.05G053000.Wm82.a2.v1	3223.47	3.42401	1.14441e-09	6.23654e-08	581.838	517.107	502.333	5157.1	1720	6637.85
Glyma.05G129400.Wm82.a2.v1	177.412	-4.64843	1.15761e-09	6.29884e-08	333.541	348.842	279	18.3592	3	8.90508
Glyma.16G060700.Wm82.a2.v1	728.802	-4.51722	1.283e-09	6.97049e-08	1423.42	1369.72	1299	91.796	18.5	30.2773
Glyma.05G219600.Wm82.a2.v1	133.21	-5.85109	1.2897e-09	6.99629e-08	277.474	246.242	248	7.34368	3.5	1.78102
Glyma.03G246700.Wm82.a2.v1	162.508	-4.97956	1.30342e-09	7.06001e-08	318.094	311.906	319.333	14.6874	2.5	5.34305
Glyma.01G219100.Wm82.a2.v1	347.95	-9.58521	1.33238e-09	7.20592e-08	652.78	737.186	663.667	1.83592	0	0
Glyma.08G078900.Wm82.a2.v1	6256.03	4.59606	1.36743e-09	7.38431e-08	520.622	472.989	450	5573.85	3449	18456.7
Glyma.07G151800.Wm82.a2.v1	1866.71	4.37841	1.39417e-09	7.51737e-08	177.355	165.187	216	5248.89	1406	1875.41
Glyma.06G009000.Wm82.a2.v1	165.214	-4.35823	1.43936e-09	7.74935e-08	309.513	320.627	329	14.6874	7.5	16.0291
Glyma.11G049100.Wm82.a2.v1	804.848	4.9389	1.44188e-09	7.75122e-08	50.3459	51.3003	43.3333	627.884	476	2489.86
Glyma.01G213000.Wm82.a2.v1	122.85	-5.23968	1.44716e-09	7.76792e-08	254.018	224.695	220.667	7.34368	1.5	5.34305
Glyma.02G234000.Wm82.a2.v1	579.976	3.60766	1.47909e-09	7.92742e-08	83.5284	92.3406	78.3333	883.077	325.5	1260.96
Glyma.04G022300.Wm82.a2.v1	153.314	-7.39728	1.50068e-09	8.03111e-08	314.662	294.977	280.333	1.83592	1	1.78102
Glyma.07G139400.Wm82.a2.v1	173.096	-5.2129	1.6407e-09	8.7673e-08	352.993	321.14	314	14.6874	2	3.56203
Glyma.05G103200.Wm82.a2.v1	168.274	-6.20847	1.71822e-09	9.16784e-08	331.253	332.939	316	0	1	8.90508
Glyma.04G212100.Wm82.a2.v1	8160.46	3.26855	1.74684e-09	9.30669e-08	1579.03	1489.76	1516	14149.4	4310	15423.6
Glyma.15G275400.Wm82.a2.v1	608.461	5.22347	1.75713e-09	9.34759e-08	33.1825	30.2672	32.6667	1960.76	338	409.634
Glyma.09G162600.Wm82.a2.v1	87.51	5.02779	1.86739e-09	9.90463e-08	6.86535	3.59102	1.66667	218.474	22	121.109
Glyma.18G044500.Wm82.a2.v1	582.196	3.47216	1.86631e-09	9.90463e-08	85.2447	107.218	104	1101.55	307.5	1034.77
Glyma.18G158400.Wm82.a2.v1	799.266	4.91758	1.91546e-09	1.01446e-07	52.6343	49.7613	46.3333	2476.66	430	618.013
Glyma.15G207200.Wm82.a2.v1	7795.69	3.57451	1.9218e-09	1.01631e-07	1177.41	1237.36	1197.67	10932.9	4581	17835.1
Glyma.08G120500.Wm82.a2.v1	240.824	4.40662	1.92585e-09	1.01695e-07	17.1634	26.1632	19.3333	627.884	137	292.087
Glyma.02G101400.Wm82.a2.v1	429.624	3.63285	1.95147e-09	1.02896e-07	64.0766	64.1254	66	649.915	221	940.377
Glyma.12G239700.Wm82.a2.v1	114.785	-5.96536	1.97199e-09	1.03824e-07	217.975	233.93	200.333	3.67184	0.5	3.56203
Glyma.05G155600.Wm82.a2.v1	11271.4	4.31501	2.00392e-09	1.0535e-07	1123.06	1033.7	1003	31711.8	5953	11216.8
Glyma.01G232400.Wm82.a2.v1	208.871	-5.21935	2.02461e-09	1.06214e-07	401.623	411.942	342.333	18.3592	2.5	3.56203
Glyma.11G224900.Wm82.a2.v1	922.01	3.32685	2.02747e-09	1.06214e-07	166.485	167.752	154	1672.52	462	1681.28
Glyma.11G256500.Wm82.a2.v1	123.725	-6.4936	2.02926e-09	1.06214e-07	258.595	230.851	249.333	3.67184	0.5	1.78102
Glyma.10G017200.Wm82.a2.v1	576.391	4.99808	2.12421e-09	1.11021e-07	36.6152	33.3452	27.3333	1801.04	322.5	434.568
Glyma.U019900.Wm82.a2.v1	9109.87	3.5309	2.15697e-09	1.12569e-07	1469.76	1431.79	1419	20593.5	4906.5	12944.4
Glyma.10G145300.Wm82.a2.v1	1114.63	3.74312	2.259e-09	1.17722e-07	168.773	141.076	149.667	2643.72	585	1504.96
Glyma.15G263100.Wm82.a2.v1	21643.8	3.75711	2.34861e-09	1.22213e-07	2999.58	2962.59	2540.67	27483.7	9491.5	53129.5
Glyma.10G223400.Wm82.a2.v1	546.957	-3.50309	2.36726e-09	1.23005e-07	1028.09	982.401	947.667	93.6319	26	83.7078
Glyma.02G124600.Wm82.a2.v1	163.125	-6.16305	2.41851e-09	1.25303e-07	325.532	318.062	309.667	0	2	8.90508
Glyma.14G149300.Wm82.a2.v1	849.734	3.35121	2.41551e-09	1.25303e-07	150.465	152.875	260	1435.69	861	1659.91
Glyma.04G249000.Wm82.a2.v1	22963.8	3.22616	2.47312e-09	1.27947e-07	4468.77	4399.52	4201.67	43314.8	11764.5	39672.1
Glyma.01G141900.Wm82.a2.v1	415.181	4.16175	2.53087e-09	1.30746e-07	46.3411	41.5533	54	482.847	275.5	1089.98
Glyma.02G116100.Wm82.a2.v1	822.611	3.83678	2.5561e-09	1.31859e-07	106.985	108.244	95.6667	1051.98	435.5	2023.23
Glyma.15G008500.Wm82.a2.v1	117.868	-6.00789	2.56915e-09	1.32341e-07	223.696	240.599	205	1.83592	1	5.34305
Glyma.15G194600.Wm82.a2.v1	391.666	4.5411	2.589e-09	1.33171e-07	33.7546	30.7802	28.3333	381.871	233.5	1120.26
Glyma.09G109200.Wm82.a2.v1	242.36	3.91994	2.59469e-09	1.33272e-07	30.3219	29.7542	25.6667	570.971	120	338.393
Glyma.17G139800.Wm82.a2.v1	130.851	-9.61986	2.64279e-09	1.35548e-07	254.59	268.814	262	0	0	0
Glyma.19G255500.Wm82.a2.v1	388.458	-3.73957	2.64903e-09	1.35674e-07	730.015	715.64	667.333	44.0621	17	64.1166
Glyma.08G138800.Wm82.a2.v1	233.197	-4.41483	2.73766e-09	1.40012e-07	425.651	465.294	445.667	29.3747	7	12.4671
Glyma.18G153800.Wm82.a2.v1	275.583	3.84978	2.76468e-09	1.41192e-07	36.6152	34.8842	35	642.572	160.5	388.262
Glyma.19G045000.Wm82.a2.v1	183.083	-4.34038	2.86424e-09	1.46068e-07	334.113	363.719	326.333	22.031	5.5	12.4671
Glyma.05G152000.Wm82.a2.v1	497.389	-3.78857	2.88846e-09	1.47019e-07	940.552	914.685	878	84.4523	19	49.8685
Glyma.15G021900.Wm82.a2.v1	128.912	-9.59832	2.89111e-09	1.47019e-07	254.018	261.632	241.667	0	0	0
Glyma.07G168600.Wm82.a2.v1	308.629	4.36893	2.91065e-09	1.47803e-07	30.3219	26.6762	23.6667	842.687	160	334.831
Glyma.13G209600.Wm82.a2.v1	11550	4.86364	3.02655e-09	1.5347e-07	807.25	726.926	706	36257.6	6218.5	8408.18
Glyma.20G066100.Wm82.a2.v1	6508.08	3.36212	3.06093e-09	1.54993e-07	1130.49	1176.83	1116.33	9948.85	3372.5	13776.2
Glyma.06G093600.Wm82.a2.v1	127.699	-9.58468	3.06833e-09	1.55148e-07	251.729	259.067	240.333	0	0	0
Glyma.18G185400.Wm82.a2.v1	617.188	5.19485	3.11121e-09	1.57094e-07	39.4757	26.1632	28.3333	1982.79	326	420.32
Glyma.16G219000.Wm82.a2.v1	424.346	-3.54589	3.12334e-09	1.57484e-07	768.347	795.155	721.667	69.7649	19.5	64.1166
Glyma.10G180600.Wm82.a2.v1	17846.1	4.06525	3.17042e-09	1.59633e-07	1989.81	2034.06	1871.33	19380	10015	47980.6
Glyma.03G143700.Wm82.a2.v1	594.3	4.20212	3.18543e-09	1.60163e-07	58.3554	64.1254	65.6667	1606.43	331.5	648.29
Glyma.04G007800.Wm82.a2.v1	236.601	3.57637	3.26609e-09	1.63988e-07	38.3315	34.8842	45	433.277	143	439.911
Glyma.20G008400.Wm82.a2.v1	51809.2	3.76592	3.27353e-09	1.64131e-07	7166.28	7024.55	6261.67	128702	26518.5	64344.6
Glyma.10G055300.Wm82.a2.v1	39622.5	3.18735	3.28385e-09	1.64418e-07	7876.84	7800.73	7311.67	71935	20428	70877.3
Glyma.09G062000.Wm82.a2.v1	350.631	5.05313	3.33332e-09	1.66662e-07	19.4518	21.5461	19.6667	1099.72	185	261.809
Glyma.07G238500.Wm82.a2.v1	574.563	8.7239	3.36209e-09	1.67865e-07	2.86056	2.56502	3.66667	22.031	387.5	2270.8
Glyma.09G126200.Wm82.a2.v1	2296.64	-3.27249	3.41332e-09	1.70185e-07	4220.47	4104.54	3880.67	460.816	114.5	400.729
Glyma.06G230700.Wm82.a2.v1	65.501	4.97537	3.421e-09	1.7033e-07	3.43267	4.61703	2.66667	154.217	30.5	99.7369
Glyma.16G020900.Wm82.a2.v1	127.646	-9.58414	3.44924e-09	1.71498e-07	224.84	285.743	254.333	0	0	0
Glyma.04G256100.Wm82.a2.v1	115.668	-5.37696	3.47713e-09	1.72644e-07	211.681	240.086	218.667	7.34368	1.5	3.56203
Glyma.12G087400.Wm82.a2.v1	135.123	-6.61754	3.56701e-09	1.76861e-07	257.45	277.535	276.333	5.50776	1.5	0
Glyma.13G094900.Wm82.a2.v1	1756.52	5.15692	3.58516e-09	1.77515e-07	86.3889	105.166	83.6667	1097.88	976	5736.65
Glyma.13G257000.Wm82.a2.v1	76.2516	10.5793	3.70174e-09	1.83034e-07	0	0	0	253.357	46.5	51.6495
Glyma.06G043000.Wm82.a2.v1	137.762	-4.87637	3.93224e-09	1.94012e-07	266.604	266.249	239	12.8514	2	5.34305
Glyma.19G047400.Wm82.a2.v1	1461.99	3.5349	3.93462e-09	1.94012e-07	240.287	224.182	226	3317.51	801.5	2065.98
Glyma.08G161600.Wm82.a2.v1	182.762	-4.05039	3.99194e-09	1.96567e-07	342.123	347.303	326	22.031	6	19.5912
Glyma.18G005000.Wm82.a2.v1	344.751	3.50012	4.04056e-09	1.98688e-07	56.067	55.9174	50.3333	559.955	182.5	707.064
Glyma.04G212000.Wm82.a2.v1	2189.53	5.19483	4.07599e-09	2.00155e-07	117.855	114.913	107.333	1297.99	1244	7227.36
Glyma.11G038500.Wm82.a2.v1	761.276	3.40898	4.1279e-09	2.02426e-07	137.879	124.147	112	1586.23	416	1196.84
Glyma.06G112200.Wm82.a2.v1	132.78	-6.592	4.13681e-09	2.02585e-07	266.032	259.58	241.333	5.50776	0.5	0
Glyma.17G138300.Wm82.a2.v1	131.156	-4.53462	4.19901e-09	2.0535e-07	250.013	252.911	219.333	11.0155	4	10.6861
Glyma.08G013000.Wm82.a2.v1	121.326	-9.5108	4.24497e-09	2.07313e-07	248.297	237.008	224.667	0	0	0
Glyma.06G105700.Wm82.a2.v1	268.906	-3.71828	4.2861e-09	2.09037e-07	509.752	489.918	477	38.5543	12.5	37.4013
Glyma.12G098900.Wm82.a2.v1	1133.04	3.53316	4.34305e-09	2.11525e-07	165.913	194.428	167.333	1630.3	610	2541.51
Glyma.11G020700.Wm82.a2.v1	118.328	-4.98452	4.35521e-09	2.11829e-07	229.989	228.799	219.333	9.1796	1.5	5.34305
Glyma.01G171100.Wm82.a2.v1	172.854	-4.51148	4.44243e-09	2.15778e-07	332.969	329.348	316.333	20.1951	3.5	8.90508
Glyma.08G246300.Wm82.a2.v1	195.276	-4.69259	4.49692e-09	2.18062e-07	371.301	380.648	350.667	22.031	6.5	7.12407
Glyma.17G038000.Wm82.a2.v1	9551.32	3.63883	4.50166e-09	2.18062e-07	1417.12	1422.05	1334.67	12403.5	4959.5	22962.6
Glyma.12G099300.Wm82.a2.v1	1347.59	6.64949	4.53257e-09	2.19262e-07	22.8845	30.2672	26	280.896	788.5	5056.31
Glyma.06G296800.Wm82.a2.v1	4687.19	3.36945	4.54868e-09	2.19744e-07	815.832	838.247	804	6983.84	2492	10110.8
Glyma.16G202500.Wm82.a2.v1	426.321	4.32185	4.55527e-09	2.19766e-07	41.1921	40.0143	48	1184.17	236	439.911
Glyma.19G000800.Wm82.a2.v1	3235.99	3.36443	4.59809e-09	2.21533e-07	571.54	574.051	558.667	4854.17	1672.5	6944.18
Glyma.05G065800.Wm82.a2.v1	4233.04	4.57861	4.64757e-09	2.23615e-07	346.7	333.452	315	12752.3	2235	3499.7
Glyma.18G052100.Wm82.a2.v1	328.24	-3.82512	4.73711e-09	2.27617e-07	589.848	636.637	589.667	33.0465	11	53.4305
Glyma.07G011300.Wm82.a2.v1	131.463	-4.67231	4.84307e-09	2.32084e-07	245.436	260.606	227	7.34368	3.5	12.4671
Glyma.09G088700.Wm82.a2.v1	10952.6	3.22123	4.83957e-09	2.32084e-07	2132.83	2109.98	2031.33	17771.7	6160.5	21796.1
Glyma.04G247900.Wm82.a2.v1	905.75	-3.32476	4.86345e-09	2.32749e-07	1660.84	1633.4	1568.67	154.217	43	174.54
Glyma.10G004800.Wm82.a2.v1	278.142	-9.2638	4.87068e-09	2.32783e-07	562.386	548.401	540.667	0	0.5	1.78102
Glyma.09G104200.Wm82.a2.v1	2978.45	3.49133	4.89336e-09	2.33555e-07	478.858	494.022	521.333	4173.04	1728	6767.86
Glyma.15G170900.Wm82.a2.v1	3624.63	3.18839	4.9285e-09	2.34919e-07	699.121	734.108	732.667	6245.8	1945.5	6819.51
Glyma.11G225600.Wm82.a2.v1	2636.92	3.64698	5.17024e-09	2.46113e-07	397.046	382.7	395.333	6341.26	1451.5	3426.68
Glyma.04G232000.Wm82.a2.v1	493.192	4.3377	5.32276e-09	2.53036e-07	40.62	52.3263	44.3333	504.878	275.5	1374.94
Glyma.09G183800.Wm82.a2.v1	4772.38	3.41517	5.3515e-09	2.54065e-07	825.558	810.545	781.667	10582.2	2595	6871.16
Glyma.03G018900.Wm82.a2.v1	274.902	-3.68111	5.50747e-09	2.61049e-07	528.632	491.457	466.333	38.5543	15	40.9634
Glyma.09G023000.Wm82.a2.v1	2759.64	-5.1455	5.51322e-09	2.61049e-07	5522.03	5213.14	5001.33	258.865	41.5	44.5254
Glyma.17G245600.Wm82.a2.v1	6572	3.33253	5.70435e-09	2.69742e-07	1159.1	1214.79	1082.67	14068.6	3328.5	9845.46
Glyma.09G181600.Wm82.a2.v1	148.428	-4.28867	5.87115e-09	2.77263e-07	298.07	266.762	274	12.8514	3	16.0291
Glyma.17G068200.Wm82.a2.v1	5694.91	3.21356	6.07975e-09	2.86735e-07	1082.44	1134.25	1053.33	11353.3	2867.5	9209.64
Glyma.08G119200.Wm82.a2.v1	368.993	-4.51394	6.19374e-09	2.91726e-07	706.559	707.432	667.667	47.7339	11.5	14.2481
Glyma.09G161100.Wm82.a2.v1	1937.98	3.21655	6.20302e-09	2.91779e-07	395.902	357.05	343.667	3737.93	993	3261.04
Glyma.05G010300.Wm82.a2.v1	273.676	3.80876	6.21954e-09	2.92171e-07	40.62	32.3192	34.6667	637.064	149	384.7
Glyma.02G236900.Wm82.a2.v1	5273.22	3.18101	6.24855e-09	2.93149e-07	1049.25	1045.5	1015	8755.5	3276	10242.6
Glyma.08G195000.Wm82.a2.v1	387.265	4.87986	6.35763e-09	2.97875e-07	25.745	25.1372	26.3333	1202.53	231	295.649
Glyma.02G241600.Wm82.a2.v1	290.889	4.45557	6.42301e-09	3.00545e-07	24.0287	26.6762	27	824.328	165	288.525
Glyma.18G047800.Wm82.a2.v1	158.083	-4.80761	6.48674e-09	3.0313e-07	322.671	287.795	282.333	16.5233	2.5	5.34305
Glyma.03G205400.Wm82.a2.v1	147.649	-4.47676	6.54357e-09	3.05386e-07	296.354	268.814	289	16.5233	3.5	8.90508
Glyma.05G059600.Wm82.a2.v1	154.589	-4.35214	6.55413e-09	3.05481e-07	318.666	270.866	160.333	11.0155	0.5	17.8102
Glyma.05G044800.Wm82.a2.v1	547.186	3.36775	6.6337e-09	3.08786e-07	108.701	84.6455	95	974.873	305.5	1020.52
Glyma.05G179200.Wm82.a2.v1	542.449	4.21683	6.72876e-09	3.12804e-07	53.7785	56.9434	45.6667	1496.27	274.5	562.801
Glyma.18G263200.Wm82.a2.v1	8091.67	4.09209	6.80539e-09	3.15956e-07	896.5	896.217	832.333	8313.04	4292	22260.9
Glyma.19G091400.Wm82.a2.v1	1265.68	4.70114	6.82986e-09	3.16681e-07	96.1148	91.3146	99.3333	974.873	703	3900.43
Glyma.07G089300.Wm82.a2.v1	145.165	-4.81113	6.86852e-09	3.17972e-07	302.075	258.554	275.333	14.6874	2	5.34305
Glyma.12G010500.Wm82.a2.v1	366.402	-4.33634	6.88188e-09	3.17972e-07	695.116	701.276	638.333	51.4057	9	17.8102
Glyma.20G130000.Wm82.a2.v1	8069.79	5.04325	6.8844e-09	3.17972e-07	471.993	478.119	457.333	26415.2	4386	4913.82
Glyma.07G209900.Wm82.a2.v1	171.767	-4.24359	6.98207e-09	3.21652e-07	332.969	319.601	305.333	22.031	5	12.4671
Glyma.19G005700.Wm82.a2.v1	208.586	4.16884	6.97788e-09	3.21652e-07	17.7355	26.1632	16.6667	525.073	120	265.371
Glyma.20G015400.Wm82.a2.v1	103	-5.80633	7.07133e-09	3.25345e-07	218.547	186.22	189.333	3.67184	0.5	3.56203
Glyma.10G081400.Wm82.a2.v1	776.531	3.23945	7.14295e-09	3.28218e-07	142.456	154.927	131.333	1432.02	395	1376.73
Glyma.04G044600.Wm82.a2.v1	160.185	-4.31497	7.19582e-09	3.30223e-07	309.513	300.62	283	11.0155	3.5	19.5912
Glyma.08G086400.Wm82.a2.v1	127.352	4.89526	7.57647e-09	3.47245e-07	12.0144	4.61703	8	159.725	84	333.05
Glyma.07G136500.Wm82.a2.v1	7857.03	3.12079	7.60946e-09	3.48311e-07	1607.06	1633.4	1543.33	14098	4316	14089.6
Glyma.14G223400.Wm82.a2.v1	32513.1	3.76489	7.66249e-09	3.5029e-07	4414.42	4496.99	4296.67	38591	17785	82550.1
Glyma.03G036900.Wm82.a2.v1	540.911	5.15832	7.70107e-09	3.51604e-07	29.1777	29.7542	21	1771.66	232	333.05
Glyma.02G229500.Wm82.a2.v1	133.693	4.71033	7.71619e-09	3.51845e-07	12.0144	7.69505	16.3333	369.02	73	146.043
Glyma.05G151800.Wm82.a2.v1	1383.54	3.37028	7.73506e-09	3.52255e-07	249.441	238.547	272	2996.22	818.5	2049.95
Glyma.14G166900.Wm82.a2.v1	139.563	-4.29042	7.78569e-09	3.5411e-07	269.465	261.632	306.333	14.6874	5.5	12.4671
Glyma.07G132000.Wm82.a2.v1	21255.6	3.69389	7.87559e-09	3.57744e-07	3124.3	2974.39	2065.67	26077.4	9208	52846.3
Glyma.18G287800.Wm82.a2.v1	107.196	-5.0375	7.90502e-09	3.58625e-07	199.095	217	200.667	7.34368	1.5	5.34305
Glyma.08G322000.Wm82.a2.v1	1269.69	4.93397	7.97126e-09	3.61172e-07	87.5332	73.3595	85.3333	4066.56	746	851.326
Glyma.02G016600.Wm82.a2.v1	1036.42	5.63708	8.01366e-09	3.62175e-07	40.62	41.0403	40	3624.1	557.5	439.911
Glyma.02G298800.Wm82.a2.v1	174.074	-5.96978	8.00818e-09	3.62175e-07	346.7	338.582	321.667	11.0155	1	0
Glyma.14G007900.Wm82.a2.v1	94.9806	6.11006	8.08369e-09	3.64879e-07	2.86056	2.56502	4	313.942	88	60.5546
Glyma.05G044000.Wm82.a2.v1	109.41	-9.36168	8.09428e-09	3.64896e-07	213.97	223.669	209.667	0	0	0
Glyma.01G086700.Wm82.a2.v1	2506.17	3.19	8.10469e-09	3.64905e-07	495.449	494.535	476.333	4095.94	1272	4938.76
Glyma.04G004100.Wm82.a2.v1	132.851	5.53458	8.26786e-09	3.71393e-07	4.00479	7.18205	6.33333	422.261	69.5	97.9559
Glyma.16G144800.Wm82.a2.v1	167.77	-5.02406	8.26958e-09	3.71393e-07	322.671	328.322	337	16.5233	3.5	3.56203
Glyma.09G119900.Wm82.a2.v1	253.706	-9.12872	8.36163e-09	3.75056e-07	519.478	493.509	478	1.83592	0.5	0
Glyma.13G101400.Wm82.a2.v1	121.898	-6.48049	8.634e-09	3.86788e-07	238.571	243.677	252.667	0	0	5.34305
Glyma.12G010800.Wm82.a2.v1	108.029	-9.34334	8.72814e-09	3.90028e-07	215.114	217	224.667	0	0	0
Glyma.13G166100.Wm82.a2.v1	1595.55	3.92079	8.7204e-09	3.90028e-07	201.383	193.915	199.333	4198.75	904	1788.14
Glyma.07G063600.Wm82.a2.v1	635.294	-3.34548	8.82253e-09	3.93754e-07	1096.74	1216.84	1059.33	106.483	33.5	121.109
Glyma.11G117900.Wm82.a2.v1	146.52	3.77972	8.86706e-09	3.95247e-07	22.8845	16.9291	6.66667	280.896	37.5	265.371
Glyma.13G119100.Wm82.a2.v1	1918.89	3.48499	8.96735e-09	3.9922e-07	301.503	327.809	287.333	2638.22	1064	4408.02
Glyma.02G219100.Wm82.a2.v1	96.1674	7.46319	8.9963e-09	3.99514e-07	1.14422	1.02601	2.33333	343.317	62	39.1824
Glyma.07G165900.Wm82.a2.v1	233.093	-4.06309	8.98813e-09	3.99514e-07	430.8	448.878	413	34.8825	7.5	17.8102
Glyma.13G175900.Wm82.a2.v1	76.5784	4.99365	9.01541e-09	3.99866e-07	6.29323	3.07802	5	102.811	41.5	194.131
Glyma.17G235300.Wm82.a2.v1	194.43	3.53596	9.05059e-09	4.00929e-07	31.4662	30.2672	33.6667	358.004	106	357.984
Glyma.02G057200.Wm82.a2.v1	105.292	-5.24423	9.08024e-09	4.01077e-07	208.249	202.123	189.333	3.67184	1.5	7.12407
Glyma.09G218800.Wm82.a2.v1	5132.61	3.69432	9.08444e-09	4.01077e-07	704.27	767.966	729	6297.2	2953	12761
Glyma.16G217600.Wm82.a2.v1	605.442	4.516	9.08759e-09	4.01077e-07	53.2064	48.2223	55	525.073	356.5	1795.26
Glyma.03G042700.Wm82.a2.v1	794.303	3.81524	9.24599e-09	4.07564e-07	113.278	97.4706	107	2001.15	430	965.311
Glyma.10G029400.Wm82.a2.v1	1727.45	3.39437	9.3411e-09	4.1125e-07	321.527	278.561	293.667	3796.68	965.5	2513.01
Glyma.02G261700.Wm82.a2.v1	3331.08	5.57228	9.41013e-09	4.13271e-07	137.307	136.972	112	1387.95	1876	11662.1
Glyma.09G216100.Wm82.a2.v1	115.771	-4.62115	9.40445e-09	4.13271e-07	215.686	229.312	207	9.1796	1.5	8.90508
Glyma.10G188700.Wm82.a2.v1	216.815	10.6327	9.74104e-09	4.27279e-07	0.572112	0	0	811.476	126	55.2115
Glyma.18G260100.Wm82.a2.v1	80.2375	5.05586	9.80667e-09	4.29631e-07	6.86535	2.56502	3.33333	113.827	42	197.693
Glyma.08G220500.Wm82.a2.v1	16562.3	3.12187	9.92805e-09	4.34416e-07	3382.9	3443.28	3321.67	31844	8661.5	27579
Glyma.15G248200.Wm82.a2.v1	5965.43	3.85108	9.94713e-09	4.34719e-07	756.332	790.025	745	15577.8	3184.5	6737.58
Glyma.07G092600.Wm82.a2.v1	3588.65	3.12241	1.00153e-08	4.37161e-07	720.861	757.706	704	6170.52	1968.5	6705.53
Glyma.05G032700.Wm82.a2.v1	2077.88	3.12574	1.00762e-08	4.39285e-07	423.935	430.41	418	3754.45	1105	3702.73
Glyma.10G082500.Wm82.a2.v1	225.421	-3.72697	1.02255e-08	4.45254e-07	433.089	405.273	415	33.0465	9.5	30.2773
Glyma.18G002800.Wm82.a2.v1	23037	3.89488	1.02754e-08	4.46429e-07	2862.28	2942.07	2694.33	61046.1	12045	25297.6
Glyma.20G122500.Wm82.a2.v1	260.376	-3.66639	1.02775e-08	4.46429e-07	486.295	479.145	454.333	42.2261	12.5	33.8393
Glyma.10G160200.Wm82.a2.v1	142.209	-4.42015	1.03125e-08	4.47405e-07	269.465	273.944	259	16.5233	3	8.90508
Glyma.19G222700.Wm82.a2.v1	132.46	-4.55394	1.03565e-08	4.4877e-07	256.878	251.372	232.667	7.34368	0.5	14.2481
Glyma.04G232500.Wm82.a2.v1	270.462	-3.87704	1.03915e-08	4.4974e-07	513.185	499.665	462.667	44.0621	11.5	24.9342
Glyma.11G208700.Wm82.a2.v1	19621.3	3.94348	1.04445e-08	4.5149e-07	2418.89	2371.1	2343.67	52661.5	10320	21033.8
Glyma.13G206300.Wm82.a2.v1	481.581	6.63404	1.04914e-08	4.52969e-07	6.86535	12.3121	5	108.319	287	1798.83
Glyma.03G034900.Wm82.a2.v1	119.04	-5.42933	1.05507e-08	4.54978e-07	219.691	245.729	204	1.83592	3	8.90508
Glyma.03G094700.Wm82.a2.v1	117.819	9.75593	1.05906e-08	4.56147e-07	0.572112	0	0	374.528	65.5	96.1749
Glyma.02G053600.Wm82.a2.v1	318.051	4.72059	1.06945e-08	4.60069e-07	22.8845	23.5982	19.6667	965.694	165.5	260.028
Glyma.18G045200.Wm82.a2.v1	14720	3.5558	1.10921e-08	4.76599e-07	2303.9	2310.57	2275.33	35372.7	7776.5	18893
Glyma.12G056000.Wm82.a2.v1	142.335	-4.22141	1.11291e-08	4.77617e-07	274.614	265.736	246	16.5233	2.5	12.4671
Glyma.07G253600.Wm82.a2.v1	147.591	-4.9761	1.16029e-08	4.97027e-07	294.066	278.048	263	14.6874	3	3.56203
Glyma.13G331300.Wm82.a2.v1	223.347	-4.28452	1.16092e-08	4.97027e-07	403.911	445.8	432	31.2106	7.5	12.4671
Glyma.05G248100.Wm82.a2.v1	196.722	4.82198	1.16598e-08	4.98597e-07	17.1634	9.74706	10.3333	578.315	109	181.664
Glyma.15G008400.Wm82.a2.v1	102.771	-9.27137	1.1954e-08	5.10567e-07	200.239	210.844	180	0	0	0
Glyma.11G056200.Wm82.a2.v1	6963.54	5.11271	1.22158e-08	5.21124e-07	393.041	389.369	352.333	23237.2	3693	3834.53
Glyma.19G164400.Wm82.a2.v1	2506.45	3.67116	1.22415e-08	5.216e-07	359.859	369.875	378.333	6225.6	1463	3070.47
Glyma.18G087100.Wm82.a2.v1	127.743	-7.12774	1.22897e-08	5.2303e-07	262.599	244.703	240.667	3.67184	0	0
Glyma.10G083300.Wm82.a2.v1	2507.22	3.33643	1.23279e-08	5.24029e-07	457.118	446.313	396	3616.76	1327.5	5508.68
Glyma.18G019600.Wm82.a2.v1	116.712	-5.40011	1.24264e-08	5.27592e-07	228.845	227.26	235.667	1.83592	0	8.90508
Glyma.08G356700.Wm82.a2.v1	1036.26	3.15597	1.25072e-08	5.30393e-07	208.821	209.305	227.667	1940.57	714	1786.36
Glyma.04G240500.Wm82.a2.v1	323.062	3.68842	1.27135e-08	5.38326e-07	46.3411	46.6833	45.6667	436.949	179	762.275
Glyma.05G233200.Wm82.a2.v1	148.569	-4.11085	1.27244e-08	5.38326e-07	273.47	288.308	468.333	14.6874	11.5	17.8102
Glyma.04G193500.Wm82.a2.v1	15352	3.4339	1.28313e-08	5.42207e-07	2623.13	2577.84	2432	20718.3	7478	35488.5
Glyma.11G072000.Wm82.a2.v1	101.478	-9.25309	1.28723e-08	5.42676e-07	204.816	201.097	356	0	0	0
Glyma.16G032600.Wm82.a2.v1	3161.71	3.74027	1.28728e-08	5.42676e-07	443.387	437.079	423	3725.08	1732.5	8041.29
Glyma.11G084100.Wm82.a2.v1	1066.93	3.5829	1.29324e-08	5.44547e-07	177.927	150.823	173.667	1408.15	632	2530.82
Glyma.12G131200.Wm82.a2.v1	283.957	4.92572	1.30586e-08	5.49212e-07	12.0144	24.1112	15	861.046	158	238.656
Glyma.04G085200.Wm82.a2.v1	329.292	-4.38758	1.35027e-08	5.67223e-07	632.184	624.838	579.333	45.898	9.5	14.2481
Glyma.20G135300.Wm82.a2.v1	100.64	-9.2411	1.36277e-08	5.71805e-07	207.105	195.454	189	0	0	0
Glyma.18G061000.Wm82.a2.v1	90.851	7.83472	1.37468e-08	5.76125e-07	0	1.53901	1	308.434	49	53.4305
Glyma.11G185000.Wm82.a2.v1	347.338	-4.25531	1.38458e-08	5.79594e-07	667.083	653.053	618.333	51.4057	7.5	17.8102
Glyma.18G270100.Wm82.a2.v1	100.689	-9.24178	1.39035e-08	5.81327e-07	213.97	188.785	175.333	0	0	0
Glyma.09G270600.Wm82.a2.v1	78.6999	6.16159	1.39745e-08	5.83616e-07	2.28845	2.05201	2.33333	257.029	40	53.4305
Glyma.18G087000.Wm82.a2.v1	100.063	-9.23283	1.40321e-08	5.85336e-07	199.667	200.584	178.333	0	0	0
Glyma.12G120300.Wm82.a2.v1	4899	3.09259	1.41487e-08	5.89514e-07	1023.51	1032.68	924.667	8230.43	2474	9309.37
Glyma.15G135600.Wm82.a2.v1	125.5	-7.10202	1.41867e-08	5.90409e-07	240.287	258.041	231	3.67184	0.5	0
Glyma.09G185500.Wm82.a2.v1	61.1068	5.21053	1.42947e-08	5.93635e-07	2.28845	4.10403	1.66667	157.889	33	80.1457
Glyma.13G240100.Wm82.a2.v1	17753.6	4.63277	1.42974e-08	5.93635e-07	1408.54	1343.04	1305	12928.5	9680	55334.4
Glyma.19G241200.Wm82.a2.v1	448.216	3.89917	1.44196e-08	5.98011e-07	57.2112	55.4044	53.3333	1156.63	259.5	523.619
Glyma.13G246800.Wm82.a2.v1	3061.14	3.08293	1.51968e-08	6.28788e-07	648.203	644.332	584.333	5259.91	1514.5	5692.13
Glyma.18G074000.Wm82.a2.v1	59.3797	4.55129	1.51969e-08	6.28788e-07	4.5769	5.13003	7.66667	113.827	40	113.985
Glyma.16G146700.Wm82.a2.v1	88.0276	5.14594	1.55659e-08	6.43313e-07	4.00479	5.64304	3	255.193	43	87.2698
Glyma.07G243700.Wm82.a2.v1	13126.2	3.29699	1.57627e-08	6.50692e-07	2545.33	2303.38	0	28757.8	0	18898.4
Glyma.03G152200.Wm82.a2.v1	5814.63	3.16523	1.58765e-08	6.54637e-07	1222.03	1110.65	1098.67	11814.1	2929	9111.68
Glyma.05G045700.Wm82.a2.v1	2973.9	3.07397	1.60258e-08	6.60032e-07	622.458	640.228	595	5190.14	1738.5	5442.79
Glyma.10G018000.Wm82.a2.v1	154.93	-4.67237	1.61077e-08	6.6264e-07	295.782	300.62	311	5.50776	3.5	17.8102
Glyma.03G084200.Wm82.a2.v1	97.8235	-9.20017	1.61464e-08	6.6347e-07	197.379	193.915	264.333	0	0.5	0
Glyma.14G117800.Wm82.a2.v1	669.452	3.8094	1.63722e-08	6.71974e-07	97.2591	81.0545	85	798.625	462.5	1700.87
Glyma.09G029800.Wm82.a2.v1	129.127	-5.30674	1.64774e-08	6.75517e-07	247.725	255.989	231.667	11.0155	1.5	1.78102
Glyma.06G298300.Wm82.a2.v1	87.0003	10.7696	1.65999e-08	6.79759e-07	0	0	0	321.286	43	26.7152
Glyma.05G048700.Wm82.a2.v1	96.4899	-5.37981	1.66988e-08	6.83026e-07	201.956	174.934	168	5.50776	0.5	3.56203
Glyma.04G221600.Wm82.a2.v1	122.247	-4.55619	1.67529e-08	6.84457e-07	219.691	249.32	232.667	12.8514	3	7.12407
Glyma.12G183400.Wm82.a2.v1	229.21	8.40873	1.6965e-08	6.92331e-07	1.14422	1.53901	1.66667	16.5233	141	897.632
Glyma.08G039300.Wm82.a2.v1	113.088	-4.74782	1.72236e-08	7.02084e-07	229.417	206.74	198.667	5.50776	1.5	10.6861
Glyma.06G114000.Wm82.a2.v1	26674.9	3.52734	1.75119e-08	7.1302e-07	4295.99	4219.45	4105.33	33782.7	14090.5	64401.6
Glyma.20G041300.Wm82.a2.v1	133.486	-4.68563	1.76146e-08	7.16387e-07	262.027	251.885	234.333	14.6874	1.5	5.34305
Glyma.18G263600.Wm82.a2.v1	1759.54	4.83539	1.78006e-08	7.23129e-07	115.567	122.608	114.333	5660.14	933	1139.85
Glyma.15G086400.Wm82.a2.v1	830.15	3.13304	1.78454e-08	7.24126e-07	170.489	169.291	151	1468.74	434.5	1512.08
Glyma.02G089500.Wm82.a2.v1	3328.88	4.81428	1.79562e-08	7.27796e-07	232.85	224.182	222.333	10705.2	1770.5	2153.25
Glyma.07G199900.Wm82.a2.v1	27278.6	3.5191	1.82059e-08	7.3708e-07	4360.64	4393.36	3964.67	34599.7	12976.5	65760.5
Glyma.15G044400.Wm82.a2.v1	468.91	-3.32588	1.84071e-08	7.44384e-07	827.274	878.262	800.333	89.96	25.5	80.1457
Glyma.09G000700.Wm82.a2.v1	151.904	-4.13957	1.85421e-08	7.48998e-07	291.777	283.178	279.667	20.1951	4	12.4671
Glyma.16G055100.Wm82.a2.v1	286.215	4.7266	1.89258e-08	7.63634e-07	26.3172	15.3901	16	857.374	160	245.78
Glyma.14G130800.Wm82.a2.v1	243.35	8.0396	1.91424e-08	7.715e-07	0.572112	3.07802	2.33333	29.3747	150	940.377
Glyma.10G167800.Wm82.a2.v1	219.584	-8.91991	1.91668e-08	7.71613e-07	449.68	426.819	411	1.83592	0.5	0
Glyma.13G328200.Wm82.a2.v1	1854.51	3.37587	1.92827e-08	7.75409e-07	325.532	326.27	313.333	2566.62	956	4199.64
Glyma.05G196900.Wm82.a2.v1	130.266	-4.18761	1.97776e-08	7.94415e-07	247.725	246.242	239.667	12.8514	4.5	14.2481
Glyma.07G199000.Wm82.a2.v1	71.3589	4.2618	1.99006e-08	7.98457e-07	8.00957	6.15604	6.66667	137.694	48	133.576
Glyma.13G242100.Wm82.a2.v1	39089	3.62998	2.00068e-08	8.01818e-07	5847.56	5837.98	5274.67	46757.2	20317	97913.2
Glyma.02G064100.Wm82.a2.v1	865.632	-4.62351	2.0156e-08	8.06893e-07	1743.8	1583.64	1468.67	110.155	18.5	24.9342
Glyma.12G045300.Wm82.a2.v1	182.768	-3.86023	2.12733e-08	8.50295e-07	338.69	345.251	310.667	27.5388	9.5	19.5912
Glyma.17G171300.Wm82.a2.v1	119.142	-4.66925	2.12877e-08	8.50295e-07	223.124	235.469	234.667	5.50776	2	12.4671
Glyma.09G082900.Wm82.a2.v1	1509.61	4.32922	2.15349e-08	8.5921e-07	148.177	137.998	140	1296.16	795.5	4456.1
Glyma.13G266300.Wm82.a2.v1	4655.41	3.44178	2.17072e-08	8.6512e-07	759.765	809.519	755	10929.2	2482	6123.13
Glyma.04G180800.Wm82.a2.v1	1047.3	3.42798	2.20064e-08	8.76065e-07	189.941	166.213	186.333	2392.2	556	1440.84
Glyma.06G213700.Wm82.a2.v1	103.631	5.3814	2.2067e-08	8.77499e-07	4.5769	5.13003	4.66667	77.1086	61	327.707
Glyma.09G178100.Wm82.a2.v1	93.1621	-9.1297	2.22002e-08	8.81818e-07	195.662	176.986	178	0	1	0
Glyma.16G077300.Wm82.a2.v1	342.916	-3.56377	2.22946e-08	8.84582e-07	601.862	662.8	563.333	64.2572	16.5	42.7444
Glyma.19G224100.Wm82.a2.v1	91.5427	-5.63299	2.28463e-08	9.05469e-07	187.081	171.856	182.667	3.67184	1	3.56203
Glyma.14G052000.Wm82.a2.v1	137.076	5.95067	2.30139e-08	9.11099e-07	5.14901	3.59102	3.33333	473.667	72.5	65.8976
Glyma.15G133600.Wm82.a2.v1	93.0102	-9.12745	2.32361e-08	9.18882e-07	169.917	202.123	176.667	0	0	0
Glyma.02G086900.Wm82.a2.v1	245.233	4.90126	2.35075e-08	9.28583e-07	14.3028	17.4421	14.6667	771.086	128.5	178.102
Glyma.16G149300.Wm82.a2.v1	2539.66	3.37097	2.36721e-08	9.34054e-07	453.685	441.696	436.333	3460.71	1352.5	5802.55
Glyma.13G237000.Wm82.a2.v1	43358.5	3.04458	2.3761e-08	9.3653e-07	9565.72	9181.73	8980.67	83381.9	21556	71304.8
Glyma.08G105700.Wm82.a2.v1	89.4582	5.54484	2.37964e-08	9.36892e-07	2.86056	4.61703	6	280.896	48.5	69.4596
Glyma.03G002500.Wm82.a2.v1	573.686	3.37578	2.393e-08	9.41115e-07	109.846	91.8276	98.6667	846.359	307	1246.71
Glyma.20G117100.Wm82.a2.v1	13544.6	3.04374	2.41926e-08	9.50397e-07	2929.21	2930.27	2814.33	26022.3	7217	22296.5
Glyma.09G233000.Wm82.a2.v1	38.9382	6.14769	2.43468e-08	9.55405e-07	1.14422	1.02601	0.666667	73.4368	34	80.1457
Glyma.08G084100.Wm82.a2.v1	111.795	-5.32281	2.48966e-08	9.75909e-07	215.114	221.104	173	9.1796	1.5	1.78102
Glyma.20G245300.Wm82.a2.v1	8801.92	3.00915	2.50076e-08	9.79188e-07	1940.03	1949.93	1842.33	15614.5	4476.5	15703.2
Glyma.02G166800.Wm82.a2.v1	110.393	-4.54717	2.51732e-08	9.84593e-07	210.537	212.896	209	11.0155	2.5	7.12407
Glyma.10G010400.Wm82.a2.v1	402.433	4.44049	2.55489e-08	9.97106e-07	35.471	35.3972	35.6667	1193.35	225	345.517
Glyma.10G018800.Wm82.a2.v1	6266.1	3.12513	2.55244e-08	9.97106e-07	1291.26	1286.1	1250	9645.92	3267.5	12841.1
Glyma.09G145700.Wm82.a2.v1	1878.36	3.30453	2.56353e-08	9.99384e-07	358.142	332.426	342.667	4162.03	1010.5	2660.84
Glyma.17G128000.Wm82.a2.v1	8430.99	3.90627	2.56685e-08	9.99588e-07	1049.25	1059.35	1003.33	8713.27	4460.5	22902.1
Glyma.11G091600.Wm82.a2.v1	1148.69	8.25728	2.57567e-08	1.00193e-06	5.72112	9.23406	4	27.5388	665	4552.28
Glyma.01G104200.Wm82.a2.v1	109.058	3.92691	2.57975e-08	1.00243e-06	12.0144	14.8771	15	168.905	61.5	240.437
Glyma.12G179000.Wm82.a2.v1	208.003	-8.84159	2.59857e-08	1.00864e-06	408.488	421.689	410.333	1.83592	0	0
Glyma.16G180800.Wm82.a2.v1	90.6473	-9.0903	2.61953e-08	1.01568e-06	172.778	189.811	184.333	0	0	0
Glyma.06G081100.Wm82.a2.v1	90.415	-9.08654	2.62421e-08	1.01639e-06	183.648	178.012	169	0	0	0
Glyma.10G221900.Wm82.a2.v1	110.165	-4.70068	2.65195e-08	1.02602e-06	213.97	210.331	272.333	11.0155	2.5	5.34305
Glyma.11G118100.Wm82.a2.v1	6723.11	3.36707	2.68805e-08	1.03887e-06	1190.57	1185.55	1120.67	9014.36	3529.5	15502
Glyma.16G073300.Wm82.a2.v1	145.235	-3.99258	2.74631e-08	1.06023e-06	255.734	290.873	265.333	16.5233	5.5	17.8102
Glyma.20G209900.Wm82.a2.v1	11631.8	3.06888	2.75548e-08	1.06263e-06	2470.38	2483.96	2437.33	18473	6674	23099.8
Glyma.02G309300.Wm82.a2.v1	182.002	-4.68212	2.83936e-08	1.0938e-06	351.277	349.355	340	22.031	4	5.34305
Glyma.08G055700.Wm82.a2.v1	89.6443	-5.60223	2.8448e-08	1.09471e-06	168.201	183.142	153.667	3.67184	1	3.56203
Glyma.08G032900.Wm82.a2.v1	1092.79	4.24605	2.86665e-08	1.10193e-06	106.985	111.835	99.6667	3183.48	599	968.873
Glyma.06G184300.Wm82.a2.v1	10968.3	3.449	2.88416e-08	1.10629e-06	1917.72	1762.68	1751.67	26101.3	5759.5	14091.4
Glyma.13G090600.Wm82.a2.v1	123.964	-4.32544	2.88345e-08	1.10629e-06	236.282	235.982	207	14.6874	1.5	8.90508
Glyma.03G114700.Wm82.a2.v1	153.728	-5.78726	2.90464e-08	1.11172e-06	303.792	300.107	281.667	11.0155	1.5	0
Glyma.07G017300.Wm82.a2.v1	89.1478	-9.06624	2.90765e-08	1.11172e-06	169.345	187.246	174	0	0	0
Glyma.07G031900.Wm82.a2.v1	18311.8	3.29515	2.90473e-08	1.11172e-06	3410.36	3361.71	3084.33	41231.1	9357	25244.1
Glyma.20G031300.Wm82.a2.v1	8184.73	4.28362	2.97883e-08	1.13772e-06	832.995	765.914	764.333	6873.68	4570	24266.3
Glyma.15G073100.Wm82.a2.v1	94.9086	5.332	2.99741e-08	1.14359e-06	4.5769	4.61703	3.66667	297.419	49.5	73.0217
Glyma.08G179400.Wm82.a2.v1	1308.25	3.28169	3.0153e-08	1.14919e-06	248.869	239.06	224.667	2873.21	716	1871.85
Glyma.01G125400.Wm82.a2.v1	140.342	-4.19812	3.08336e-08	1.17388e-06	246.58	285.743	250	18.3592	5	10.6861
Glyma.10G188900.Wm82.a2.v1	669.282	5.28157	3.11633e-08	1.18517e-06	33.7546	33.3452	30	2291.23	362.5	318.802
Glyma.10G045100.Wm82.a2.v1	95.6421	-5.09523	3.13255e-08	1.19007e-06	191.085	180.577	194.333	7.34368	1.5	3.56203
Glyma.12G109600.Wm82.a2.v1	6799.32	4.06627	3.14681e-08	1.19422e-06	742.029	790.025	682.333	6398.18	3750	19267
Glyma.09G255500.Wm82.a2.v1	494.867	3.18493	3.16344e-08	1.19926e-06	105.841	90.2886	90	851.867	257.5	931.472
Glyma.20G110900.Wm82.a2.v1	16664.4	4.78566	3.17701e-08	1.20312e-06	1251.78	1080.38	1099.33	10319.7	9092.5	54005.8
Glyma.06G248900.Wm82.a2.v1	5415.44	4.10424	3.24845e-08	1.22888e-06	601.862	588.415	539.333	15500.7	2839	4970.82
Glyma.12G078700.Wm82.a2.v1	92.4549	-6.07188	3.2585e-08	1.23138e-06	190.513	173.908	177.333	1.83592	0	3.56203
Glyma.16G076600.Wm82.a2.v1	367.887	3.44669	3.26421e-08	1.23223e-06	64.6487	58.9954	56.6667	525.073	185	822.83
Glyma.16G084700.Wm82.a2.v1	126.902	5.22565	3.29017e-08	1.24072e-06	9.15379	4.10403	5.66667	391.051	72.5	103.299
Glyma.05G124900.Wm82.a2.v1	75.0441	5.48669	3.35893e-08	1.26505e-06	4.00479	2.56502	3.66667	229.49	43	64.1166
Glyma.08G051600.Wm82.a2.v1	380.505	-3.53653	3.36178e-08	1.26505e-06	718.001	683.32	663.667	45.898	15.5	74.8027
Glyma.07G205200.Wm82.a2.v1	86.7897	-9.0275	3.37692e-08	1.26747e-06	177.355	169.804	289.667	0	0	0
Glyma.09G008200.Wm82.a2.v1	361.308	3.5062	3.37884e-08	1.26747e-06	53.7785	63.0994	52.3333	824.328	189.5	504.028
Glyma.19G178200.Wm82.a2.v1	98.7609	-5.4214	3.37203e-08	1.26747e-06	206.532	179.551	207	1.83592	1	7.12407
Glyma.07G168900.Wm82.a2.v1	3303.59	4.17758	3.409e-08	1.27745e-06	362.147	329.861	345.667	9589.01	1984.5	2933.33
Glyma.06G178000.Wm82.a2.v1	4151.16	3.76807	3.41283e-08	1.27754e-06	552.66	582.772	507.333	10934.7	2115.5	4534.47
Glyma.01G025600.Wm82.a2.v1	1520.06	3.03683	3.5117e-08	1.31318e-06	344.412	316.01	308	2627.2	747	2792.63
Glyma.18G204000.Wm82.a2.v1	254	4.52618	3.5184e-08	1.31431e-06	21.7403	20.5201	17.3333	758.235	136	215.503
Glyma.07G000300.Wm82.a2.v1	230.545	-3.67254	3.52258e-08	1.3145e-06	435.949	419.124	394.333	40.3902	9	26.7152
Glyma.10G028800.Wm82.a2.v1	417.717	-3.30529	3.54429e-08	1.32122e-06	739.169	778.226	705.667	69.7649	20	83.7078
Glyma.15G059900.Wm82.a2.v1	2763.2	3.91439	3.56855e-08	1.32888e-06	342.695	344.738	301.333	7558.48	1449.5	2806.88
Glyma.18G059700.Wm82.a2.v1	112.241	-5.94111	3.6132e-08	1.3441e-06	224.84	217	207	0	1.5	7.12407
Glyma.13G181000.Wm82.a2.v1	12330.9	3.33297	3.62577e-08	1.34738e-06	2274.15	2178.72	2091.33	16492.1	6287.5	28378.7
Glyma.18G184900.Wm82.a2.v1	92.3111	-5.6414	3.65431e-08	1.35657e-06	186.509	175.447	168.333	5.50776	1.5	1.78102
Glyma.08G056400.Wm82.a2.v1	3158.35	4.2671	3.68189e-08	1.36523e-06	322.099	301.646	282.667	9359.52	1597.5	2650.15
Glyma.U019800.Wm82.a2.v1	343.102	3.49906	3.68527e-08	1.36523e-06	56.6391	54.8914	52.3333	473.667	207	787.209
Glyma.17G104300.Wm82.a2.v1	147.344	-3.93348	3.69128e-08	1.36604e-06	284.34	268.814	247.667	20.1951	4	16.0291
Glyma.20G010900.Wm82.a2.v1	195.465	-8.75168	3.70048e-08	1.36803e-06	379.882	400.143	356.333	1.83592	0	0
Glyma.02G262500.Wm82.a2.v1	7197.35	3.14033	3.78311e-08	1.39653e-06	1461.75	1470.78	1404	10663	3634	15193.9
Glyma.19G046300.Wm82.a2.v1	17290.9	3.05911	3.78538e-08	1.39653e-06	3819.42	3590	3535.33	27010	8844.5	34744.1
Glyma.09G123800.Wm82.a2.v1	4702.16	3.47652	3.82821e-08	1.41087e-06	751.183	799.259	734.333	11380.9	2498	5877.35
Glyma.11G051700.Wm82.a2.v1	1214.33	3.06698	3.84808e-08	1.41674e-06	255.162	262.658	242	2353.65	649	1985.83
Glyma.05G043100.Wm82.a2.v1	261.286	-3.56298	3.86461e-08	1.42136e-06	458.262	505.308	476.333	47.7339	12.5	33.8393
Glyma.05G156500.Wm82.a2.v1	3304.66	3.07118	3.95769e-08	1.4541e-06	704.27	701.276	747.667	6657.04	1801.5	5156.04
Glyma.02G124400.Wm82.a2.v1	614.913	3.11459	3.96208e-08	1.45421e-06	135.591	119.017	128.333	1136.43	301.5	1068.61
Glyma.13G107500.Wm82.a2.v1	760.953	3.10291	4.02311e-08	1.4751e-06	161.908	155.44	164	1479.75	440.5	1246.71
Glyma.07G139800.Wm82.a2.v1	490.902	4.33057	4.13291e-08	1.51381e-06	45.769	47.1963	152.667	1448.54	1100.5	422.101
Glyma.01G096000.Wm82.a2.v1	24299.7	2.99942	4.14429e-08	1.51642e-06	5416.19	5387.56	4947.33	39413.5	12083	46981.4
Glyma.14G179200.Wm82.a2.v1	520.234	3.13204	4.15626e-08	1.51925e-06	105.841	107.218	104	998.74	254	869.136
Glyma.19G248100.Wm82.a2.v1	259.925	3.63866	4.19044e-08	1.53017e-06	37.7594	39.5013	34.6667	618.705	140.5	343.736
Glyma.19G127400.Wm82.a2.v1	95.0228	-4.85798	4.19982e-08	1.53203e-06	164.768	202.636	183	7.34368	0	5.34305
Glyma.18G294300.Wm82.a2.v1	40799.6	3.69628	4.25475e-08	1.55049e-06	5888.75	5799.5	5549	45106.7	21800	106403
Glyma.06G011700.Wm82.a2.v1	146.13	3.53644	4.29415e-08	1.56325e-06	21.7403	24.6242	27	247.849	78	290.306
Glyma.09G028800.Wm82.a2.v1	523.494	3.16947	4.35286e-08	1.58302e-06	100.692	108.757	115.333	840.851	294	1043.68
Glyma.18G263100.Wm82.a2.v1	462.743	4.18975	4.42042e-08	1.60595e-06	52.0622	44.1183	9.66667	433.277	72	1321.51
Glyma.08G082600.Wm82.a2.v1	947.823	4.11269	4.43889e-08	1.61102e-06	98.4033	108.757	101.667	2704.31	572	879.822
Glyma.07G183100.Wm82.a2.v1	82.3053	4.60854	4.44712e-08	1.61237e-06	6.29323	6.66904	5	93.6319	39	222.627
Glyma.02G111500.Wm82.a2.v1	228.84	-3.74605	4.49031e-08	1.62639e-06	434.233	417.585	454	40.3902	8	23.1532
Glyma.06G063500.Wm82.a2.v1	121.658	-4.55848	4.50205e-08	1.62898e-06	243.72	223.156	217.333	5.50776	1	14.2481
Glyma.02G018600.Wm82.a2.v1	73.8924	4.22557	4.57479e-08	1.65363e-06	5.72112	9.23406	7	152.381	49	128.233
Glyma.10G245300.Wm82.a2.v1	507.74	3.65117	4.6085e-08	1.66413e-06	73.8025	75.9245	68	1266.78	253.5	614.451
Glyma.08G102900.Wm82.a2.v1	207.992	-3.88823	4.63547e-08	1.67218e-06	377.594	401.682	372.667	34.8825	6	17.8102
Glyma.18G074100.Wm82.a2.v1	5775.99	3.08806	4.75481e-08	1.7135e-06	1216.31	1214.79	1120	8715.11	2894	11957.7
Glyma.09G018800.Wm82.a2.v1	195.268	-4.88848	4.76591e-08	1.71577e-06	385.604	369.875	340.333	22.031	3.5	3.56203
Glyma.06G136400.Wm82.a2.v1	277.423	3.25548	4.80915e-08	1.7296e-06	54.9228	50.2743	57	536.088	145	468.407
Glyma.11G233100.Wm82.a2.v1	132.271	-4.1153	4.85812e-08	1.74546e-06	254.018	246.242	236.333	11.0155	4	17.8102
Glyma.06G220800.Wm82.a2.v1	53.5687	6.27935	4.9047e-08	1.76042e-06	1.71634	1.02601	4	45.898	29	165.635
Glyma.02G024200.Wm82.a2.v1	4273.88	3.284	4.97244e-08	1.78295e-06	822.697	768.992	763.667	9710.18	2247	5793.65
Glyma.02G209400.Wm82.a2.v1	96.5332	-5.37662	4.99228e-08	1.78827e-06	203.1	173.908	180.667	7.34368	1	1.78102
Glyma.03G035300.Wm82.a2.v1	812.244	4.25041	5.05592e-08	1.80744e-06	80.0957	82.0805	73.6667	2392.2	435	694.596
Glyma.15G029200.Wm82.a2.v1	1832.38	4.10215	5.05553e-08	1.80744e-06	189.369	213.922	202	1663.34	1071.5	5262.9
Glyma.09G225700.Wm82.a2.v1	104.786	-5.22692	5.12331e-08	1.8297e-06	201.956	206.227	177.667	9.1796	1.5	1.78102
Glyma.06G120400.Wm82.a2.v1	47.4594	9.89513	5.15998e-08	1.84096e-06	0	0	0	154.217	27	35.6203
Glyma.07G243500.Wm82.a2.v1	16601.4	3.02234	5.22292e-08	1.86156e-06	3738.75	3538.7	3732.67	33175.1	9186	25953
Glyma.03G032800.Wm82.a2.v1	158.842	-4.81189	5.24978e-08	1.86927e-06	311.801	301.646	281	18.3592	4	3.56203
Glyma.05G194600.Wm82.a2.v1	183.037	-8.65897	5.31447e-08	1.89042e-06	361.003	369.362	358	0	0.5	1.78102
Glyma.07G179900.Wm82.a2.v1	90.0324	4.67386	5.33154e-08	1.89461e-06	7.43746	6.15604	7.33333	93.6319	52.5	252.904
Glyma.15G018400.Wm82.a2.v1	244.844	4.55437	5.40013e-08	1.91707e-06	19.4518	20.5201	17.3333	741.711	132	197.693
Glyma.17G154500.Wm82.a2.v1	9310.5	2.95126	5.41436e-08	1.92022e-06	2148.28	2115.63	1936.33	17356.8	4679.5	15621.3
Glyma.19G227200.Wm82.a2.v1	33.9156	9.4108	5.43879e-08	1.92697e-06	0	0	0	69.7649	20.5	65.8976
Glyma.14G140400.Wm82.a2.v1	4607.15	3.18113	5.46291e-08	1.93261e-06	905.081	924.945	897.667	6534.04	2468.5	10064.5
Glyma.16G094600.Wm82.a2.v1	1820.46	3.10748	5.46551e-08	1.93261e-06	375.878	381.161	360	3783.83	946.5	2740.98
Glyma.18G259500.Wm82.a2.v1	80.0769	-8.91138	5.49762e-08	1.94204e-06	160.764	159.544	150.333	0	0	0
Glyma.U037800.Wm82.a2.v1	162.237	-4.0135	5.56951e-08	1.96549e-06	294.638	316.523	283.333	12.8514	7	24.9342
Glyma.17G156900.Wm82.a2.v1	325.605	-3.33245	5.59782e-08	1.97353e-06	628.179	556.609	531	62.4213	11.5	55.2115
Glyma.10G019100.Wm82.a2.v1	502.608	3.11718	5.65537e-08	1.99186e-06	109.273	98.4966	97.3333	962.022	256.5	840.64
Glyma.09G103000.Wm82.a2.v1	146.376	-5.11783	5.67488e-08	1.99677e-06	279.191	289.847	255.667	14.6874	0	1.78102
Glyma.03G171600.Wm82.a2.v1	131.05	-5.12946	5.73589e-08	2.01625e-06	274.614	234.956	268	12.8514	2.5	1.78102
Glyma.13G036600.Wm82.a2.v1	18612	4.4403	5.77662e-08	2.02857e-06	1664.27	1613.91	1587.67	13409.6	10182	57760.1
Glyma.11G180700.Wm82.a2.v1	2399.7	2.96089	5.84602e-08	2.05093e-06	534.353	558.148	601.667	4114.29	1428	4391.99
Glyma.02G234800.Wm82.a2.v1	287.22	3.25214	5.86881e-08	2.0569e-06	53.2064	55.9174	53.3333	464.488	159.5	575.268
Glyma.15G096600.Wm82.a2.v1	88.7716	6.20904	5.94709e-08	2.0823e-06	0.572112	4.10403	2.33333	282.732	46	67.6786
Glyma.05G040900.Wm82.a2.v1	126.804	-4.35743	6.02187e-08	2.10642e-06	241.431	242.138	233.333	16.5233	3.5	7.12407
Glyma.02G038800.Wm82.a2.v1	315.514	3.25141	6.06583e-08	2.11972e-06	53.2064	66.6904	57	613.197	153	528.962
Glyma.11G245800.Wm82.a2.v1	417.876	-3.21399	6.09303e-08	2.12715e-06	756.332	752.576	699.667	77.1086	18	85.4888
Glyma.20G152900.Wm82.a2.v1	241.181	-3.44155	6.10619e-08	2.12966e-06	457.118	426.306	441	38.5543	11	42.7444
Glyma.17G028000.Wm82.a2.v1	12153.2	2.93711	6.13769e-08	2.1344e-06	2750.72	2863.58	2654.33	22557.9	6012.5	20440.7
Glyma.18G105900.Wm82.a2.v1	202.164	-3.79283	6.1356e-08	2.1344e-06	358.142	396.039	413	34.8825	10	19.5912
Glyma.19G116400.Wm82.a2.v1	5871.89	2.94874	6.13678e-08	2.1344e-06	1370.78	1322.52	1274.67	9796.46	3079	10997.8
Glyma.15G275000.Wm82.a2.v1	660.609	-4.11795	6.14434e-08	2.13464e-06	1222.6	1275.84	1178.67	110.155	20.5	33.8393
Glyma.02G238100.Wm82.a2.v1	755.852	3.06408	6.16494e-08	2.13971e-06	176.211	146.719	148.333	1325.53	378.5	1374.94
Glyma.08G164100.Wm82.a2.v1	24381.7	3.9709	6.18814e-08	2.14568e-06	2905.19	2941.56	2705	22824.1	13628	68855.9
Glyma.05G002500.Wm82.a2.v1	9659.16	3.14711	6.28976e-08	2.1788e-06	2027.57	1891.44	1849.67	20913	4939.5	13804.7
Glyma.06G119700.Wm82.a2.v1	3675.41	3.22956	6.32691e-08	2.18955e-06	699.693	716.666	670.333	8241.44	2009	5043.84
Glyma.13G263800.Wm82.a2.v1	128.713	-5.10282	6.33976e-08	2.19188e-06	243.72	256.502	239.333	12.8514	3.5	1.78102
Glyma.05G077200.Wm82.a2.v1	4446.22	3.14059	6.35758e-08	2.19591e-06	927.394	883.905	875	9576.15	2579	6397.41
Glyma.08G246700.Wm82.a2.v1	177.033	-8.6084	6.40845e-08	2.21135e-06	356.426	349.868	322.333	1.83592	0	0
Glyma.16G196200.Wm82.a2.v1	3861.31	3.40602	6.47145e-08	2.23094e-06	642.482	688.963	642	9265.88	2005	4847.93
Glyma.01G238800.Wm82.a2.v1	18562.1	4.02271	6.52235e-08	2.24631e-06	2097.36	2205.91	2036.33	53098.5	9998.5	16846.6
Glyma.02G259300.Wm82.a2.v1	77.6649	-8.86725	6.62183e-08	2.27838e-06	156.759	153.901	148	0	0	0
Glyma.09G022500.Wm82.a2.v1	99.8707	-6.17566	6.7128e-08	2.30746e-06	213.398	180.577	179.667	5.50776	1.5	0
Glyma.06G136500.Wm82.a2.v1	1498	4.19487	6.72748e-08	2.31029e-06	152.754	157.492	145.667	1261.28	820.5	4420.48
Glyma.08G080700.Wm82.a2.v1	84.1752	-5.1813	6.73634e-08	2.31111e-06	167.629	160.057	149.333	3.67184	2.5	5.34305
Glyma.17G105600.Wm82.a2.v1	435.878	3.10045	6.76397e-08	2.31836e-06	93.8264	88.2366	70.6667	816.984	158	744.465
Glyma.18G267100.Wm82.a2.v1	253.725	-4.00912	6.7773e-08	2.32071e-06	500.598	455.034	440.333	16.5233	10.5	42.7444
Glyma.05G180100.Wm82.a2.v1	26581.2	3.05602	6.82753e-08	2.33567e-06	5640.45	5771.8	6550.67	39615.5	15803.5	55297
Glyma.13G249600.Wm82.a2.v1	1802.93	-3.71776	6.8365e-08	2.3365e-06	3464.14	3238.08	3125.67	361.676	73.5	147.824
Glyma.18G022700.Wm82.a2.v1	2200.68	3.24783	6.86793e-08	2.345e-06	448.536	389.883	399.333	4929.44	1083	3034.85
Glyma.04G017400.Wm82.a2.v1	155.118	-4.7764	6.93517e-08	2.3657e-06	306.652	291.899	275.667	18.3592	2.5	3.56203
Glyma.08G021800.Wm82.a2.v1	1096.64	3.05361	7.00325e-08	2.38665e-06	213.97	257.528	213.333	1799.2	536	2115.85
Glyma.11G047700.Wm82.a2.v1	85.1293	-5.94676	7.14188e-08	2.43157e-06	174.494	160.57	161.667	3.67184	1	1.78102
Glyma.U009500.Wm82.a2.v1	1294.89	3.21138	7.15593e-08	2.43404e-06	237.427	267.275	244	1835.92	669	2838.94
Glyma.07G050000.Wm82.a2.v1	86.7947	4.34159	7.16344e-08	2.43428e-06	9.15379	7.18205	7.66667	223.982	42	106.861
Glyma.09G145800.Wm82.a2.v1	1016.05	3.12638	7.19014e-08	2.44103e-06	203.672	213.922	199	1518.31	531	2128.31
Glyma.11G034400.Wm82.a2.v1	202.535	4.45239	7.26794e-08	2.46276e-06	20.0239	15.3901	12	178.084	108	596.64
Glyma.13G336600.Wm82.a2.v1	98.0609	-6.14898	7.26371e-08	2.46276e-06	197.951	188.785	172.667	5.50776	0	0
Glyma.14G167800.Wm82.a2.v1	34.4981	9.43507	7.31597e-08	2.47669e-06	0	0	0	88.1241	17	49.8685
Glyma.06G162600.Wm82.a2.v1	1014.39	-3.49459	7.35025e-08	2.48594e-06	1915.43	1811.41	1739.33	220.31	40	110.423
Glyma.07G032000.Wm82.a2.v1	607.52	4.11939	7.36801e-08	2.48766e-06	73.2304	58.9954	63.6667	1738.62	318.5	559.239
Glyma.13G360600.Wm82.a2.v1	13333	3.82108	7.36925e-08	2.48766e-06	1784.42	1739.59	1693.67	36450.3	7050.5	13357.6
Glyma.15G181800.Wm82.a2.v1	115.449	3.64693	7.42269e-08	2.50334e-06	17.7355	16.4161	11.6667	185.428	58	242.218
Glyma.18G004900.Wm82.a2.v1	5467.15	3.11581	7.45967e-08	2.51344e-06	1166.54	1095.26	1152.33	11718.7	2912.5	7888.12
Glyma.17G137400.Wm82.a2.v1	1492.85	4.45922	7.47704e-08	2.51692e-06	129.869	129.79	139.667	4646.71	785.5	1065.05
Glyma.18G220600.Wm82.a2.v1	152.534	-3.83861	7.54211e-08	2.53643e-06	280.907	289.334	268.333	23.8669	6	16.0291
Glyma.06G157400.Wm82.a2.v1	1790.31	2.95409	7.55326e-08	2.53779e-06	424.507	393.987	407.667	3293.64	921	3049.1
Glyma.13G112200.Wm82.a2.v1	847.174	-4.67315	7.80072e-08	2.61848e-06	1629.95	1630.84	1510.33	108.319	20.5	19.5912
Glyma.13G147600.Wm82.a2.v1	75.5686	-8.82776	7.84515e-08	2.63092e-06	155.042	147.232	139.667	0	0	0
Glyma.04G050300.Wm82.a2.v1	30446.1	3.44098	7.88266e-08	2.64103e-06	5313.78	4954.59	4867	36788.1	15832	74727.9
Glyma.19G135600.Wm82.a2.v1	113.885	-4.08696	7.96345e-08	2.66559e-06	211.681	218.539	193	12.8514	4.5	12.4671
Glyma.08G146300.Wm82.a2.v1	107.507	6.05534	7.99946e-08	2.67514e-06	1.71634	4.61703	4.66667	53.2417	70.5	370.451
Glyma.01G135200.Wm82.a2.v1	252.087	4.03044	8.04378e-08	2.68596e-06	26.3172	31.8062	32	686.634	136	263.59
Glyma.14G211800.Wm82.a2.v1	288.82	4.29263	8.04682e-08	2.68596e-06	26.3172	29.7542	29.6667	844.523	163	254.685
Glyma.11G146800.Wm82.a2.v1	452.784	-3.50037	8.05586e-08	2.68646e-06	837.572	826.448	786.333	95.4678	22	51.6495
Glyma.05G208300.Wm82.a2.v1	254.636	-5.77424	8.15267e-08	2.71622e-06	494.877	505.308	466	18.3592	3	0
Glyma.05G195200.Wm82.a2.v1	84.8268	4.36559	8.1653e-08	2.71789e-06	8.00957	7.69505	7.33333	100.976	41	222.627
Glyma.09G013700.Wm82.a2.v1	3753.46	3.84465	8.18198e-08	2.72091e-06	479.43	497.613	466.333	3712.23	1931.5	10324.6
Glyma.02G018300.Wm82.a2.v1	1691.88	3.02549	8.19078e-08	2.7213e-06	356.998	383.213	356	2632.71	851.5	3394.62
Glyma.19G252000.Wm82.a2.v1	55.3568	5.67142	8.21481e-08	2.72675e-06	1.14422	3.07802	3.66667	56.9135	29.5	160.291
Glyma.11G053300.Wm82.a2.v1	13210.8	3.35566	8.25516e-08	2.7376e-06	2394.29	2308.51	2175	16600.4	6923	31540
Glyma.07G195700.Wm82.a2.v1	1888.54	2.95333	8.26717e-08	2.73905e-06	455.973	407.838	413	3482.74	1054	3207.61
Glyma.02G046600.Wm82.a2.v1	144.921	-3.98421	8.33292e-08	2.75827e-06	256.878	288.308	250.333	22.031	3	12.4671
Glyma.11G242200.Wm82.a2.v1	1415.05	-4.02318	8.36459e-08	2.76619e-06	2706.09	2626.06	2504	249.685	43	78.3647
Glyma.02G061400.Wm82.a2.v1	82.4293	-5.15025	8.39229e-08	2.77279e-06	159.619	161.083	158.667	3.67184	2	5.34305
Glyma.13G162700.Wm82.a2.v1	2814.81	3.05262	8.4204e-08	2.77951e-06	589.276	621.76	686.333	4218.94	1797	5829.27
Glyma.03G258300.Wm82.a2.v1	316.649	-4.68417	8.4881e-08	2.79927e-06	607.583	611.5	572.667	40.3902	4.5	7.12407
Glyma.05G019200.Wm82.a2.v1	237.086	3.30625	8.61298e-08	2.83784e-06	48.6295	38.4752	39	391.051	106.5	470.188
Glyma.19G052600.Wm82.a2.v1	85.4956	5.84254	8.68961e-08	2.86045e-06	1.71634	4.10403	2.66667	282.732	41	53.4305
Glyma.15G112700.Wm82.a2.v1	849.13	-4.58216	8.78354e-08	2.88871e-06	1661.99	1598.52	1493.33	22.031	19	113.985
Glyma.10G179400.Wm82.a2.v1	74.094	-8.79936	8.79884e-08	2.89108e-06	147.605	148.771	143.333	0	0	0
Glyma.08G158500.Wm82.a2.v1	106.826	-4.22661	8.88017e-08	2.91359e-06	197.379	208.279	210.667	9.1796	5.5	12.4671
Glyma.19G017200.Wm82.a2.v1	8601.53	2.99637	8.88364e-08	2.91359e-06	1920.01	1911.45	1900.67	17448.6	4707.5	13126.1
Glyma.13G166200.Wm82.a2.v1	355.171	-3.26832	8.93773e-08	2.92864e-06	635.617	651.514	582	58.7494	19.5	74.8027
Glyma.01G001000.Wm82.a2.v1	1934.1	3.44082	8.99117e-08	2.94346e-06	326.104	326.27	356.333	2353.65	1172	4730.38
Glyma.11G194600.Wm82.a2.v1	164.881	-4.53369	9.10934e-08	2.97941e-06	314.09	318.062	311	22.031	3.5	5.34305
Glyma.20G143900.Wm82.a2.v1	7092.45	2.89816	9.15173e-08	2.99054e-06	1702.61	1652.9	1557	13040.5	3610	11973.8
Glyma.02G103500.Wm82.a2.v1	118.595	-5.67511	9.19933e-08	3.00335e-06	222.552	242.651	208.667	9.1796	0.5	0
Glyma.07G125500.Wm82.a2.v1	61309.6	3.8972	9.21579e-08	3.00378e-06	8046.19	7378.01	7249.67	58031.6	32928.5	171783
Glyma.08G345800.Wm82.a2.v1	4998.6	5.18676	9.21744e-08	3.00378e-06	270.609	263.684	245	2048.89	2774.5	17411.2
Glyma.04G227200.Wm82.a2.v1	73.5118	-8.78795	9.25029e-08	3.01173e-06	149.893	144.154	146.333	0	0	0
Glyma.02G218100.Wm82.a2.v1	421.477	-4.1526	9.33145e-08	3.0354e-06	792.375	803.876	711	20.1951	11.5	69.4596
Glyma.03G087600.Wm82.a2.v1	302.067	-3.33929	9.37495e-08	3.04677e-06	588.131	511.464	502.667	60.5853	15	48.0874
Glyma.03G221700.Wm82.a2.v1	960.326	4.46386	9.43132e-08	3.06231e-06	82.3841	84.1325	74	2996.22	508.5	678.567
Glyma.09G249700.Wm82.a2.v1	150.383	-3.88754	9.46343e-08	3.06995e-06	269.465	293.951	266.333	23.8669	2.5	14.2481
Glyma.20G017500.Wm82.a2.v1	2789.1	3.21013	9.47284e-08	3.07021e-06	580.122	507.873	528.333	3822.38	1489.5	6246.02
Glyma.01G203400.Wm82.a2.v1	744.194	3.48556	9.48387e-08	3.07077e-06	132.158	111.835	116	1810.22	370.5	922.566
Glyma.02G252800.Wm82.a2.v1	167.017	4.02974	9.49174e-08	3.07077e-06	20.596	17.9551	20	444.292	102	185.226
Glyma.11G078400.Wm82.a2.v1	277.474	3.25756	9.56139e-08	3.09051e-06	53.7785	51.3003	48	427.769	144	577.049
Glyma.17G150100.Wm82.a2.v1	3203.82	4.01213	9.62802e-08	3.10923e-06	366.724	381.161	484.667	9205.3	2320.5	2862.09
Glyma.07G186700.Wm82.a2.v1	66.4854	4.16879	9.73604e-08	3.14128e-06	6.29323	7.69505	13.3333	146.874	66.5	105.08
Glyma.06G004100.Wm82.a2.v1	87.2944	3.95358	9.93567e-08	3.2028e-06	11.4422	9.74706	18	128.514	83	199.474
Glyma.17G166600.Wm82.a2.v1	46.3285	5.79229	1.00385e-07	3.23303e-06	2.28845	1.02601	1.33333	130.35	26.5	51.6495
Glyma.14G031300.Wm82.a2.v1	190.18	-4.03952	1.00479e-07	3.23314e-06	381.027	336.017	356.667	31.2106	11	12.4671
Glyma.11G134200.Wm82.a2.v1	5829.83	3.14937	1.01619e-07	3.26687e-06	1232.9	1129.12	1118.67	8101.91	2923.5	12855.4
Glyma.01G162500.Wm82.a2.v1	265.509	-4.2054	1.04042e-07	3.34179e-06	534.353	472.989	499.667	42.2261	8.5	12.4671
Glyma.12G148400.Wm82.a2.v1	146.785	5.20956	1.06623e-07	3.42159e-06	5.14901	10.2601	12.3333	477.339	87.5	94.3939
Glyma.15G251600.Wm82.a2.v1	2720.92	3.63449	1.0855e-07	3.48031e-06	417.07	393.987	369.667	7119.69	1444.5	2952.93
Glyma.12G050700.Wm82.a2.v1	1267.31	3.16502	1.09137e-07	3.49601e-06	254.018	254.45	248.333	2785.09	728	1775.67
Glyma.11G038700.Wm82.a2.v1	174.217	-3.67769	1.09483e-07	3.50395e-06	312.945	333.452	307.667	20.1951	7.5	30.2773
Glyma.19G231800.Wm82.a2.v1	109.954	4.2473	1.10026e-07	3.51818e-06	14.8749	7.18205	7	271.716	66	146.043
Glyma.02G040600.Wm82.a2.v1	610.131	3.45421	1.10623e-07	3.53411e-06	108.129	95.9316	99.3333	1472.41	301	764.056
Glyma.19G153300.Wm82.a2.v1	1993.03	3.03825	1.11012e-07	3.54337e-06	423.935	441.183	420.667	4134.49	1053	2972.52
Glyma.13G318400.Wm82.a2.v1	377.925	5.154	1.11356e-07	3.54871e-06	17.1634	24.1112	23.6667	1286.98	233.5	183.445
Glyma.14G048600.Wm82.a2.v1	71.2529	-8.74295	1.11378e-07	3.54871e-06	141.884	143.128	138	0	0	0
Glyma.06G004000.Wm82.a2.v1	117.839	3.70975	1.12205e-07	3.57188e-06	16.0191	17.4421	11.6667	170.74	55	267.152
Glyma.06G071400.Wm82.a2.v1	105.9	-4.3394	1.1278e-07	3.58697e-06	217.403	186.22	200.667	12.8514	1.5	7.12407
Glyma.13G176400.Wm82.a2.v1	21852	3.16773	1.13902e-07	3.61945e-06	4463.05	4289.73	5132	49085.1	13799.5	29570.2
Glyma.08G175500.Wm82.a2.v1	1401.49	2.92198	1.15606e-07	3.66774e-06	326.676	326.783	330.667	2603.33	845	2349.16
Glyma.16G212200.Wm82.a2.v1	16032.5	5.54495	1.15627e-07	3.66774e-06	697.405	647.41	658	4670.58	8814.5	58114.6
Glyma.13G155600.Wm82.a2.v1	513.291	3.33479	1.16062e-07	3.67829e-06	93.8264	91.3146	97	1182.33	280	685.691
Glyma.01G007200.Wm82.a2.v1	7355.63	2.87324	1.17641e-07	3.72501e-06	1735.79	1797.56	1702	12398	3537	13491.2
Glyma.19G079100.Wm82.a2.v1	331.605	3.21596	1.18498e-07	3.74885e-06	65.7929	63.0994	138.667	499.37	384.5	698.158
Glyma.07G096100.Wm82.a2.v1	70.9426	-8.73673	1.19641e-07	3.78165e-06	129.869	153.901	129.667	0	0	0
Glyma.06G128000.Wm82.a2.v1	642.797	3.00352	1.2054e-07	3.80671e-06	142.456	142.615	126.333	1048.31	332.5	1237.81
Glyma.14G063900.Wm82.a2.v1	92.6263	-4.44261	1.2119e-07	3.82385e-06	185.936	168.265	161.667	9.1796	3	7.12407
Glyma.09G280900.Wm82.a2.v1	121.69	4.37929	1.22533e-07	3.86282e-06	12.5865	9.74706	10	343.317	64.5	121.109
Glyma.06G164200.Wm82.a2.v1	2380.8	4.64036	1.22767e-07	3.86679e-06	181.932	185.194	158.333	7738.4	1251	1417.69
Glyma.05G247300.Wm82.a2.v1	90.3878	-4.78939	1.22971e-07	3.8698e-06	175.066	173.908	155.333	3.67184	2.5	8.90508
Glyma.13G285400.Wm82.a2.v1	5581.33	4.35962	1.23826e-07	3.89329e-06	548.083	488.892	497.333	17325.6	3023.5	3962.76
Glyma.07G027500.Wm82.a2.v1	95.2692	-6.70077	1.23986e-07	3.89489e-06	187.081	190.324	169.333	3.67184	0.5	0
Glyma.12G195500.Wm82.a2.v1	117.65	-4.25482	1.25183e-07	3.92903e-06	232.278	214.948	195	7.34368	4	16.0291
Glyma.13G311600.Wm82.a2.v1	3763.56	3.12453	1.26052e-07	3.95285e-06	772.924	775.661	729	8285.5	1941	5220.16
Glyma.16G025100.Wm82.a2.v1	147.533	-4.47083	1.28555e-07	4.0278e-06	295.782	268.814	278.333	20.1951	4	5.34305
Glyma.15G023500.Wm82.a2.v1	39.6842	9.63695	1.29119e-07	4.04191e-06	0	0	0	126.678	22	32.0583
Glyma.10G247000.Wm82.a2.v1	150.142	-4.03657	1.29771e-07	4.05877e-06	294.638	271.379	287.333	23.8669	3.5	10.6861
Glyma.13G136200.Wm82.a2.v1	1967.82	2.88761	1.29899e-07	4.05922e-06	454.257	482.736	446	3539.65	1014	3394.62
Glyma.01G087300.Wm82.a2.v1	64.3602	5.27959	1.30241e-07	4.06636e-06	2.86056	3.59102	3.66667	55.0776	34	195.912
Glyma.03G112700.Wm82.a2.v1	34.7936	5.98303	1.32446e-07	4.13159e-06	1.14422	1.02601	0.333333	55.0776	22.5	81.9268
Glyma.14G034600.Wm82.a2.v1	247.253	4.34934	1.33203e-07	4.1516e-06	25.745	20.5201	19.3333	734.368	128.5	208.379
Glyma.15G060300.Wm82.a2.v1	627.567	-3.40823	1.34557e-07	4.19012e-06	1161.39	1132.71	1072.67	141.366	30.5	74.8027
Glyma.20G159200.Wm82.a2.v1	394.739	-3.70152	1.35523e-07	4.21654e-06	759.765	706.406	674.667	78.9445	15	33.8393
Glyma.08G299500.Wm82.a2.v1	73.0846	9.08006	1.37159e-07	4.26375e-06	0	0.513003	0.333333	229.49	46.5	62.3356
Glyma.19G231000.Wm82.a2.v1	3908.6	4.99635	1.37868e-07	4.28207e-06	252.301	222.643	242.333	1767.99	2243.5	13391.5
Glyma.09G107200.Wm82.a2.v1	1099.86	2.97324	1.39288e-07	4.3224e-06	256.878	240.086	277.667	1736.78	591.5	2165.72
Glyma.04G202900.Wm82.a2.v1	648.944	-3.80876	1.39642e-07	4.32964e-06	1235.19	1187.6	1157.33	126.678	23	46.3064
Glyma.05G181600.Wm82.a2.v1	106.259	-4.09529	1.39818e-07	4.33134e-06	212.254	189.298	173.667	11.0155	3.5	12.4671
Glyma.06G025200.Wm82.a2.v1	830.469	3.71465	1.4037e-07	4.34466e-06	120.716	114.4	115.667	2212.28	435.5	874.479
Glyma.02G033600.Wm82.a2.v1	382.394	-4.39751	1.42177e-07	4.3968e-06	731.731	728.465	733.667	56.9135	12	12.4671
Glyma.13G257500.Wm82.a2.v1	80.2635	-5.44321	1.42318e-07	4.39735e-06	163.052	150.823	144.333	1.83592	1.5	5.34305
Glyma.07G219000.Wm82.a2.v1	108.125	4.12123	1.42739e-07	4.40653e-06	14.3028	9.23406	13.6667	275.388	64.5	133.576
Glyma.14G185600.Wm82.a2.v1	152.564	-3.76953	1.43373e-07	4.42229e-06	279.191	289.334	289.667	25.7029	7	16.0291
Glyma.20G109400.Wm82.a2.v1	78.6434	-5.83049	1.44674e-07	4.45859e-06	156.759	152.362	142.333	3.67184	1	1.78102
Glyma.02G134800.Wm82.a2.v1	357.824	3.11605	1.44843e-07	4.45995e-06	77.2351	70.7945	61	567.299	185	715.969
Glyma.07G054600.Wm82.a2.v1	136.382	4.10786	1.45035e-07	4.46202e-06	16.5913	13.3381	17.6667	148.709	74.5	366.889
Glyma.16G212100.Wm82.a2.v1	3133.28	3.58556	1.45413e-07	4.46978e-06	499.454	464.268	450.333	8156.99	1648.5	3412.43
Glyma.02G015600.Wm82.a2.v1	212.527	-4.81427	1.45763e-07	4.47669e-06	427.368	393.474	409.667	25.7029	1.5	3.56203
Glyma.03G056400.Wm82.a2.v1	24983.9	3.21481	1.46108e-07	4.48346e-06	4820.04	4897.13	4449	32429.7	12592.5	57788.6
Glyma.07G006300.Wm82.a2.v1	969.851	3.05914	1.4673e-07	4.49866e-06	219.119	196.48	199	2015.84	521	1447.97
Glyma.01G143500.Wm82.a2.v1	745.765	4.62547	1.47038e-07	4.50427e-06	56.6391	59.5084	59	458.98	400.5	2407.93
Glyma.17G153000.Wm82.a2.v1	158.075	-4.47015	1.4809e-07	4.5326e-06	303.792	301.133	290.667	22.031	4	5.34305
Glyma.07G268300.Wm82.a2.v1	442.745	3.27705	1.48439e-07	4.53939e-06	73.2304	92.3406	94.3333	976.709	265	628.699
Glyma.06G073200.Wm82.a2.v1	2517.01	2.92048	1.49588e-07	4.5628e-06	569.824	604.831	554.333	4909.25	1296	3984.13
Glyma.06G110400.Wm82.a2.v1	256.628	4.42858	1.49527e-07	4.5628e-06	29.1777	16.4161	22	760.071	128	220.846
Glyma.07G019100.Wm82.a2.v1	34876.2	3.45794	1.49348e-07	4.5628e-06	5744.58	5891.84	5711.33	39971.6	18733.5	87896.7
Glyma.08G287300.Wm82.a2.v1	1217.43	3.77995	1.50275e-07	4.57987e-06	154.47	175.96	182.667	3317.51	732.5	1221.78
Glyma.14G195300.Wm82.a2.v1	99.3384	3.69873	1.53621e-07	4.67786e-06	11.4422	16.9291	16	189.1	51	179.883
Glyma.04G000300.Wm82.a2.v1	79.5188	-5.42947	1.53963e-07	4.68426e-06	159.047	151.849	145.333	1.83592	0.5	5.34305
Glyma.19G206200.Wm82.a2.v1	6235.53	2.84315	1.55835e-07	4.73721e-06	1548.14	1502.59	1412.33	10573.1	3110.5	11318.4
Glyma.16G008300.Wm82.a2.v1	959.813	3.20163	1.57825e-07	4.79362e-06	192.23	184.168	200.333	2162.71	568.5	1300.14
Glyma.01G244100.Wm82.a2.v1	63.2032	6.85322	1.58522e-07	4.81069e-06	1.14422	1.02601	1	222.146	37.5	28.4963
Glyma.06G132100.Wm82.a2.v1	78.9115	-5.83995	1.59157e-07	4.82589e-06	137.879	172.369	159	1.83592	0.5	3.56203
Glyma.17G007300.Wm82.a2.v1	1889.46	2.9686	1.63791e-07	4.96217e-06	451.396	404.76	445	3802.19	1217.5	2899.49
Glyma.11G028800.Wm82.a2.v1	89.6022	-6.0168	1.64083e-07	4.96682e-06	173.35	179.551	173	5.50776	1.5	0
Glyma.15G003400.Wm82.a2.v1	33836.6	3.56451	1.64984e-07	4.98987e-06	5327.51	5220.83	4928.33	36459.5	17721	88338.4
Glyma.10G128900.Wm82.a2.v1	148.766	-8.35909	1.66419e-07	5.02902e-06	300.359	292.925	273	0	0.5	1.78102
Glyma.02G277300.Wm82.a2.v1	111.325	-4.4124	1.66632e-07	5.03118e-06	213.398	211.87	198.333	14.6874	2	5.34305
Glyma.04G063700.Wm82.a2.v1	449.286	3.76943	1.68171e-07	5.07338e-06	56.067	66.6904	62.6667	1198.86	235	475.531
Glyma.20G044100.Wm82.a2.v1	66.6069	-8.64572	1.70077e-07	5.12655e-06	125.865	140.563	135.333	0	0	0
Glyma.17G251200.Wm82.a2.v1	173.079	4.79771	1.71914e-07	5.17754e-06	14.3028	9.74706	9.66667	548.94	92	119.328
Glyma.03G216300.Wm82.a2.v1	24825.9	3.26538	1.73666e-07	5.22593e-06	4562.02	4792.48	4387.67	58863.2	12634.5	31085.9
Glyma.19G023000.Wm82.a2.v1	1712.82	3.12236	1.7492e-07	5.25924e-06	355.854	349.868	424	3787.5	889.5	2358.07
Glyma.07G168500.Wm82.a2.v1	11654.5	4.1017	1.75206e-07	5.26341e-06	1308.99	1256.86	1199.33	9300.77	6235.5	34751.2
Glyma.06G265500.Wm82.a2.v1	6210.44	3.79002	1.75947e-07	5.27677e-06	822.697	852.098	801.667	5939.2	3520	17227.8
Glyma.08G151100.Wm82.a2.v1	209.833	3.60686	1.75868e-07	5.27677e-06	35.471	28.2152	28	506.714	111	268.933
Glyma.20G087200.Wm82.a2.v1	110.886	-4.40641	1.76313e-07	5.28332e-06	216.258	207.253	201.667	14.6874	3.5	5.34305
Glyma.04G090000.Wm82.a2.v1	75.2411	-5.34372	1.76871e-07	5.29198e-06	156.759	136.972	139.667	3.67184	0	3.56203
Glyma.14G086500.Wm82.a2.v1	1198.42	3.29422	1.76898e-07	5.29198e-06	215.686	227.773	207.667	1521.98	610.5	2828.25
Glyma.08G083300.Wm82.a2.v1	1045.72	3.69246	1.78039e-07	5.32166e-06	145.889	154.414	134	2797.94	530	1084.64
Glyma.10G232600.Wm82.a2.v1	85.5833	-4.50242	1.79326e-07	5.35566e-06	154.47	173.395	167.333	7.34368	2	7.12407
Glyma.08G299900.Wm82.a2.v1	183.664	-4.50633	1.79743e-07	5.36363e-06	355.282	348.329	316.667	25.7029	3.5	5.34305
Glyma.02G171600.Wm82.a2.v1	66.3309	-8.63977	1.80706e-07	5.38394e-06	120.144	145.18	133	0	0	0
Glyma.04G014000.Wm82.a2.v1	211.158	-4.13491	1.80725e-07	5.38394e-06	395.329	403.734	375	34.8825	6	10.6861
Glyma.15G064800.Wm82.a2.v1	462.177	3.55091	1.81645e-07	5.40616e-06	65.7929	79.5155	56	1156.63	229.5	546.772
Glyma.19G098500.Wm82.a2.v1	6873.71	3.66196	1.81773e-07	5.40616e-06	1063.56	949.569	970.667	18427.1	3646	7054.61
Glyma.06G238400.Wm82.a2.v1	123.71	-3.82985	1.82184e-07	5.41387e-06	219.691	242.651	222.667	14.6874	4.5	17.8102
Glyma.13G349500.Wm82.a2.v1	65.6447	-8.62466	1.82378e-07	5.41515e-06	133.302	129.277	126.333	0	0	0
Glyma.15G021700.Wm82.a2.v1	304.71	4.25101	1.84901e-07	5.48481e-06	32.6104	28.2152	38.3333	905.108	161	252.904
Glyma.17G135300.Wm82.a2.v1	2226.27	2.99552	1.85031e-07	5.48481e-06	492.016	500.178	478	3269.77	1140.5	4643.11
Glyma.07G247800.Wm82.a2.v1	258.247	24.9474	1.85274e-07	5.48747e-06	0	0	0	0	150	1032.99
Glyma.09G117400.Wm82.a2.v1	283.308	-3.32501	1.87182e-07	5.53938e-06	494.877	535.575	502.333	42.2261	18.5	60.5546
Glyma.05G197400.Wm82.a2.v1	5511.25	2.97877	1.87974e-07	5.55823e-06	1234.05	1247.62	1179	8061.52	2793	11501.8
Glyma.19G190100.Wm82.a2.v1	1010.31	3.25091	1.8822e-07	5.5609e-06	192.802	191.35	184.333	2344.47	532.5	1312.61
Glyma.16G027800.Wm82.a2.v1	34.9769	9.45578	1.90278e-07	5.61704e-06	0	0	1	33.0465	19	106.861
Glyma.05G069100.Wm82.a2.v1	1336.03	4.4612	1.92042e-07	5.65978e-06	116.139	115.939	99.3333	4246.48	739.5	865.574
Glyma.13G369800.Wm82.a2.v1	97.0004	-5.70905	1.91966e-07	5.65978e-06	203.672	176.986	189.333	7.34368	1	0
Glyma.19G052900.Wm82.a2.v1	32.2993	9.33992	1.93369e-07	5.6942e-06	0	0	0.666667	91.796	13.5	37.4013
Glyma.05G011600.Wm82.a2.v1	84.4201	-5.17818	1.94135e-07	5.71203e-06	156.187	172.369	169.333	7.34368	1	1.78102
Glyma.13G253000.Wm82.a2.v1	702.103	2.91728	1.94482e-07	5.71754e-06	168.773	159.544	151.333	1281.47	347.5	1198.62
Glyma.16G159100.Wm82.a2.v1	225.999	-3.30264	1.95773e-07	5.75076e-06	402.195	418.611	392.333	42.2261	7	40.9634
Glyma.18G220500.Wm82.a2.v1	105.675	-4.6351	1.96709e-07	5.77351e-06	213.398	192.889	194.667	12.8514	3.5	3.56203
Glyma.02G022000.Wm82.a2.v1	15660.3	3.38615	1.97269e-07	5.78047e-06	2668.9	2799.46	2658.33	18298.6	8218	38874.2
Glyma.12G199800.Wm82.a2.v1	62.3756	5.62963	1.97233e-07	5.78047e-06	3.43267	1.53901	2.33333	196.443	30	48.0874
Glyma.13G147400.Wm82.a2.v1	277.128	3.4426	2.00848e-07	5.87572e-06	49.7738	43.6053	42	653.587	149.5	361.546
Glyma.16G162400.Wm82.a2.v1	260.456	4.19868	2.00718e-07	5.87572e-06	24.0287	29.7542	29.3333	760.071	140	227.97
Glyma.10G007300.Wm82.a2.v1	2403.36	3.13087	2.04661e-07	5.97747e-06	517.189	467.859	528.667	3255.08	1409.5	5373.33
Glyma.12G021400.Wm82.a2.v1	85.5342	-4.5016	2.04557e-07	5.97747e-06	147.605	180.064	161.333	7.34368	2.5	7.12407
Glyma.01G116300.Wm82.a2.v1	90.7031	-5.02682	2.05419e-07	5.99471e-06	180.215	171.856	177.667	1.83592	2.5	8.90508
Glyma.07G028000.Wm82.a2.v1	991.995	-3.29528	2.05659e-07	5.99682e-06	1815.31	1785.76	1656.67	238.669	47.5	128.233
Glyma.15G027100.Wm82.a2.v1	336.115	3.36636	2.06148e-07	6.00619e-06	57.7833	61.0474	51.3333	783.938	161	441.692
Glyma.08G032300.Wm82.a2.v1	935.992	2.96921	2.08125e-07	6.05886e-06	215.686	208.279	201.333	1435.69	485.5	1884.32
Glyma.19G170400.Wm82.a2.v1	2070.06	2.93028	2.09587e-07	6.09644e-06	481.146	479.145	464.667	4167.54	1028	3152.4
Glyma.18G121700.Wm82.a2.v1	160.641	-4.41673	2.11519e-07	6.14765e-06	296.354	317.549	339	5.50776	5	23.1532
Glyma.10G063000.Wm82.a2.v1	80.2256	-4.84016	2.13653e-07	6.20462e-06	161.336	148.771	152.333	3.67184	1.5	7.12407
Glyma.09G207500.Wm82.a2.v1	34.6354	9.44062	2.141e-07	6.21254e-06	0	0	0	106.483	16.5	32.0583
Glyma.10G075800.Wm82.a2.v1	64.0218	-8.5885	2.15338e-07	6.2434e-06	135.018	121.069	125.333	0	0	0
Glyma.07G051400.Wm82.a2.v1	91.8431	-5.03109	2.15969e-07	6.25662e-06	182.504	173.908	180.333	9.1796	2.5	1.78102
Glyma.05G057400.Wm82.a2.v1	63.8397	-8.58449	2.1684e-07	6.27397e-06	123.004	132.355	106.667	0	0	0
Glyma.11G152700.Wm82.a2.v1	104.4	4.79993	2.16919e-07	6.27397e-06	5.72112	8.72106	8	319.45	83	83.7078
Glyma.U031000.Wm82.a2.v1	722.52	2.89759	2.18274e-07	6.30805e-06	171.634	170.317	166	1233.74	373	1314.39
Glyma.02G298500.Wm82.a2.v1	311.957	4.34634	2.20417e-07	6.36224e-06	34.8988	23.5982	28	939.991	198	249.342
Glyma.11G135300.Wm82.a2.v1	76.91	-5.38033	2.20505e-07	6.36224e-06	142.456	158.005	151.333	1.83592	1.5	5.34305
Glyma.06G000200.Wm82.a2.v1	85.6234	-4.50595	2.22402e-07	6.41181e-06	166.485	161.596	141.333	5.50776	2.5	8.90508
Glyma.03G260600.Wm82.a2.v1	141.002	-8.27911	2.24174e-07	6.45768e-06	272.325	289.847	309	1.83592	0	0
Glyma.06G230800.Wm82.a2.v1	108.582	-4.37469	2.24697e-07	6.46755e-06	206.532	207.766	203.667	14.6874	3.5	5.34305
Glyma.01G144400.Wm82.a2.v1	86.7298	-4.7181	2.2622e-07	6.50616e-06	165.913	168.265	166.333	9.1796	2	3.56203
Glyma.17G097000.Wm82.a2.v1	1013.16	-2.9043	2.26698e-07	6.51466e-06	1722.63	1852.45	1646	246.013	65	231.532
Glyma.20G237900.Wm82.a2.v1	351.447	-3.35461	2.27707e-07	6.5384e-06	656.213	624.325	583.667	78.9445	14	46.3064
Glyma.02G088100.Wm82.a2.v1	51.9249	5.58982	2.29405e-07	6.58185e-06	0.572112	3.59102	2	135.858	29.5	67.6786
Glyma.09G099500.Wm82.a2.v1	63.2676	-8.57151	2.29853e-07	6.58943e-06	120.716	132.355	119.333	0	0	0
Glyma.12G051800.Wm82.a2.v1	89.5665	3.95594	2.30198e-07	6.59402e-06	11.4422	10.2601	10	117.499	47	219.065
Glyma.15G133000.Wm82.a2.v1	169.873	5.25344	2.31906e-07	6.63764e-06	9.15379	8.20805	11.3333	581.986	103	80.1457
Glyma.08G116700.Wm82.a2.v1	74.5209	-5.75571	2.33151e-07	6.66792e-06	151.61	141.076	147.667	1.83592	1	3.56203
Glyma.07G209500.Wm82.a2.v1	785.474	2.94128	2.35045e-07	6.71135e-06	176.211	185.707	191.333	1542.17	389.5	1237.81
Glyma.10G288100.Wm82.a2.v1	62.9024	-8.56311	2.3497e-07	6.71135e-06	126.437	125.173	121.333	0	0	0
Glyma.02G033700.Wm82.a2.v1	105.886	-4.20624	2.35762e-07	6.72645e-06	199.095	202.636	203.333	14.6874	2.5	7.12407
Glyma.14G175100.Wm82.a2.v1	171.56	-3.54581	2.3598e-07	6.72731e-06	314.09	318.062	330.333	22.031	6.5	32.0583
Glyma.07G118900.Wm82.a2.v1	29.518	9.2101	2.3634e-07	6.73221e-06	0	0	0	77.1086	15.5	40.9634
Glyma.09G188700.Wm82.a2.v1	91.0947	-4.42294	2.38066e-07	6.77597e-06	177.355	170.83	160.667	5.50776	3	10.6861
Glyma.14G046500.Wm82.a2.v1	1047.82	3.68306	2.40828e-07	6.84914e-06	159.619	143.128	137	2818.14	606.5	1070.39
Glyma.16G141100.Wm82.a2.v1	94.0169	-5.66315	2.41637e-07	6.86669e-06	182.504	186.22	157.333	7.34368	0.5	0
Glyma.20G156400.Wm82.a2.v1	707.003	2.94117	2.42628e-07	6.88936e-06	169.345	156.466	158.333	1127.25	369	1374.94
Glyma.13G354100.Wm82.a2.v1	201.572	-4.73511	2.46826e-07	7.00299e-06	400.479	376.544	391.333	25.7029	4.5	3.56203
Glyma.06G021400.Wm82.a2.v1	373.254	3.12905	2.49439e-07	7.07151e-06	72.0861	81.0545	68.3333	554.448	190.5	785.428
Glyma.03G048500.Wm82.a2.v1	92.6972	-4.6284	2.49904e-07	7.07909e-06	187.653	168.778	175.667	3.67184	2	10.6861
Glyma.11G118500.Wm82.a2.v1	237.353	-3.27966	2.52307e-07	7.14043e-06	466.271	394.5	427.333	45.898	16.5	42.7444
Glyma.16G145500.Wm82.a2.v1	62.8042	-8.56096	2.52469e-07	7.14043e-06	112.706	138.511	115	0	0	0
Glyma.19G127100.Wm82.a2.v1	174.07	4.06981	2.52772e-07	7.14336e-06	16.0191	23.0851	20.3333	178.084	104.5	479.093
Glyma.01G109800.Wm82.a2.v1	366.035	3.04481	2.53148e-07	7.14832e-06	76.663	81.5675	71	728.86	181	577.049
Glyma.06G102000.Wm82.a2.v1	4055.53	7.47937	2.53863e-07	7.15158e-06	45.769	44.6313	43.6667	95.4678	2397	16036.3
Glyma.14G136600.Wm82.a2.v1	8669.51	3.45438	2.53691e-07	7.15158e-06	1446.3	1452.83	1344.33	22163.2	4426	9615.71
Glyma.20G205100.Wm82.a2.v1	437.601	-3.35219	2.53505e-07	7.15158e-06	797.524	796.694	717.333	100.976	18.5	55.2115
Glyma.05G219200.Wm82.a2.v1	795.834	3.11572	2.55247e-07	7.18491e-06	163.052	166.213	166.333	1101.55	445	1752.52
Glyma.15G072600.Wm82.a2.v1	916.672	5.69131	2.57341e-07	7.23815e-06	38.3315	31.2932	29	218.474	504.5	3378.59
Glyma.18G043600.Wm82.a2.v1	140.162	-4.62432	2.58699e-07	7.27062e-06	298.643	240.086	103	18.3592	1.5	3.56203
Glyma.02G265900.Wm82.a2.v1	7967.4	4.00611	2.5962e-07	7.29048e-06	942.269	924.945	865	23503.4	4237	6498.93
Glyma.19G166900.Wm82.a2.v1	2430.49	2.87913	2.59813e-07	7.29048e-06	589.276	574.051	553.333	4793.59	1217.5	3765.07
Glyma.04G229600.Wm82.a2.v1	210.716	-3.29898	2.61183e-07	7.32317e-06	389.608	375.518	363.333	38.5543	11.5	39.1824
Glyma.20G246800.Wm82.a2.v1	343.565	-3.08784	2.61955e-07	7.33905e-06	610.444	619.195	574.333	71.6008	22	73.0217
Glyma.10G053000.Wm82.a2.v1	86.0946	-5.95803	2.64958e-07	7.41738e-06	186.509	152.362	144	5.50776	2	0
Glyma.19G085200.Wm82.a2.v1	1393.62	8.82293	2.67797e-07	7.49097e-06	4.5769	7.69505	5.33333	3.67184	850	5558.55
Glyma.01G165300.Wm82.a2.v1	10709.7	3.117	2.70311e-07	7.5495e-06	2226.66	2200.78	2001.67	14066.8	5420	24344.7
Glyma.03G092800.Wm82.a2.v1	151.09	-3.96689	2.70183e-07	7.5495e-06	298.643	269.327	261.667	25.7029	4.5	10.6861
Glyma.17G223900.Wm82.a2.v1	819.287	2.90269	2.71127e-07	7.56046e-06	191.085	195.454	226	1310.85	696	1579.76
Glyma.18G290300.Wm82.a2.v1	7550.09	4.45658	2.71075e-07	7.56046e-06	642.482	673.06	614.667	4595.31	4126	24289.5
Glyma.19G054700.Wm82.a2.v1	100.749	-4.01175	2.73833e-07	7.62998e-06	187.081	192.376	194	12.8514	3	10.6861
Glyma.01G177400.Wm82.a2.v1	1536.7	3.06213	2.74157e-07	7.63304e-06	303.792	353.459	328	2159.04	863.5	3330.5
Glyma.06G114300.Wm82.a2.v1	4013.33	2.83697	2.7559e-07	7.66697e-06	987.466	983.427	931.333	7740.24	1981.5	6342.2
Glyma.08G032800.Wm82.a2.v1	3623.43	3.80208	2.76189e-07	7.67767e-06	486.295	483.249	434.333	10215.1	1906.5	3309.13
Glyma.19G244800.Wm82.a2.v1	8868.01	3.01782	2.77455e-07	7.70688e-06	1950.9	1947.36	1929	19293.7	4579	12280.1
Glyma.02G269000.Wm82.a2.v1	83.7454	-5.93205	2.79838e-07	7.76685e-06	171.634	158.005	154.667	0	1.5	5.34305
Glyma.05G174200.Wm82.a2.v1	986.251	3.1554	2.80049e-07	7.76685e-06	198.523	199.558	194.667	2234.31	516	1312.61
Glyma.09G134900.Wm82.a2.v1	61.1417	-8.52219	2.80317e-07	7.76825e-06	117.855	126.712	111.667	0	0	0
Glyma.10G008400.Wm82.a2.v1	282.902	-4.1558	2.82334e-07	7.81809e-06	548.656	522.75	516.333	47.7339	9	12.4671
Glyma.08G351900.Wm82.a2.v1	182.499	-5.46961	2.83867e-07	7.84886e-06	366.152	347.816	382.333	0	3.5	16.0291
Glyma.20G029700.Wm82.a2.v1	299.826	11.0928	2.83884e-07	7.84886e-06	0.572112	0	0	3.67184	158	1195.06
Glyma.06G235500.Wm82.a2.v1	17291.3	3.86772	2.87814e-07	7.95008e-06	2247.26	2186.93	2183	15124.3	9111	49606.6
Glyma.10G257800.Wm82.a2.v1	2512.12	2.79562	2.8805e-07	7.95008e-06	640.193	624.838	584.667	4509.02	1257	4274.44
Glyma.15G261500.Wm82.a2.v1	194.576	24.5531	2.88212e-07	7.95008e-06	0	0	0	0	120	778.304
Glyma.01G019200.Wm82.a2.v1	8902.48	-3.49744	2.90501e-07	8.00703e-06	16107.8	16605.4	15525.3	2050.72	431.5	845.983
Glyma.08G165400.Wm82.a2.v1	7923.37	2.77298	2.94496e-07	8.10465e-06	2075.62	1969.42	1880.67	13696	3913.5	13952.5
Glyma.09G217200.Wm82.a2.v1	134.541	-8.21122	2.94439e-07	8.10465e-06	250.585	285.743	240	1.83592	0	0
Glyma.07G024000.Wm82.a2.v1	821.407	2.86344	2.95907e-07	8.13722e-06	197.379	199.558	187.667	1365.92	398.5	1522.77
Glyma.15G057500.Wm82.a2.v1	60.8404	-8.51494	2.96597e-07	8.14992e-06	131.014	112.348	116.333	0	0	0
Glyma.03G219900.Wm82.a2.v1	633.147	3.7491	2.98674e-07	8.18811e-06	93.2543	82.0805	79.6667	627.884	346	1729.37
Glyma.04G220600.Wm82.a2.v1	133.707	-8.20221	2.98495e-07	8.18811e-06	258.023	274.97	256	1.83592	0	0
Glyma.12G045400.Wm82.a2.v1	629.571	-2.95786	2.98632e-07	8.18811e-06	1093.31	1137.84	1062.33	132.186	40.5	154.948
Glyma.01G234500.Wm82.a2.v1	8282.42	3.13713	3.05564e-07	8.37059e-06	1664.85	1716.51	1579.67	19058.7	4145	10689.7
Glyma.09G218700.Wm82.a2.v1	200.529	3.67004	3.05901e-07	8.3734e-06	29.1777	29.2412	31.6667	510.386	106	233.313
Glyma.08G060800.Wm82.a2.v1	90.7873	-4.25164	3.08434e-07	8.43626e-06	166.485	178.525	164.333	11.0155	2	7.12407
Glyma.10G259300.Wm82.a2.v1	1676.98	3.55322	3.09994e-07	8.47245e-06	240.287	286.256	243.333	4389.68	907	1791.7
Glyma.13G179300.Wm82.a2.v1	4179.67	3.44643	3.10548e-07	8.48113e-06	716.857	687.937	672	4609.99	2136	10703.9
Glyma.01G237400.Wm82.a2.v1	797.627	3.43313	3.11336e-07	8.49614e-06	139.023	131.329	121.667	2001.15	405.5	919.004
Glyma.03G137200.Wm82.a2.v1	103.598	-4.05218	3.14338e-07	8.565e-06	202.528	188.272	182.667	14.6874	4.5	8.90508
Glyma.20G067300.Wm82.a2.v1	132.326	-8.18716	3.1426e-07	8.565e-06	259.167	268.301	250	1.83592	0.5	0
Glyma.18G036100.Wm82.a2.v1	525.797	3.64275	3.14628e-07	8.56636e-06	73.8025	82.0805	88.3333	1391.63	279	555.677
Glyma.18G158100.Wm82.a2.v1	5661.72	2.82556	3.15939e-07	8.59552e-06	1358.19	1441.54	1309.67	10942.1	2792.5	8905.08
Glyma.03G253900.Wm82.a2.v1	1696.24	3.50928	3.19357e-07	8.68189e-06	271.753	275.996	257	4409.88	873	1827.32
Glyma.19G184300.Wm82.a2.v1	59.6766	-8.48715	3.21509e-07	8.73375e-06	120.716	117.991	113.667	0	0	0
Glyma.18G134200.Wm82.a2.v1	2664.64	3.57599	3.2858e-07	8.91905e-06	379.31	445.287	404.333	2772.24	1438	7061.73
Glyma.14G207500.Wm82.a2.v1	82.1234	3.79277	3.31682e-07	8.99642e-06	10.298	11.7991	14	121.171	48	185.226
Glyma.03G215000.Wm82.a2.v1	93.7564	4.69339	3.36807e-07	9.12852e-06	5.72112	8.20805	3.66667	282.732	49	78.3647
Glyma.08G073300.Wm82.a2.v1	739.806	2.96651	3.3934e-07	9.19021e-06	155.042	180.577	143.667	1494.44	396.5	1129.16
Glyma.09G269600.Wm82.a2.v1	89.1665	-4.22938	3.40984e-07	9.22775e-06	169.345	169.291	153	7.34368	5	10.6861
Glyma.12G042800.Wm82.a2.v1	177.451	3.4877	3.41759e-07	9.24172e-06	25.745	32.3192	31.3333	413.082	90	238.656
Glyma.08G106000.Wm82.a2.v1	87.8679	-4.96524	3.42739e-07	9.26121e-06	167.629	172.882	165.667	9.1796	2.5	1.78102
Glyma.08G340200.Wm82.a2.v1	1918.85	2.78615	3.44083e-07	9.29051e-06	488.584	483.249	456	3447.86	1052.5	3255.7
Glyma.07G040400.Wm82.a2.v1	7632.64	3.16064	3.49064e-07	9.41789e-06	1568.73	1502.07	1471.67	9649.59	4043.5	17810.2
Glyma.12G228400.Wm82.a2.v1	1241.35	2.85255	3.50475e-07	9.44882e-06	288.345	315.497	263.333	2377.52	615.5	1984.05
Glyma.02G028700.Wm82.a2.v1	470.19	-3.30808	3.52034e-07	9.4837e-06	858.168	850.046	849	111.991	23.5	60.5546
Glyma.15G251700.Wm82.a2.v1	70.9461	4.25806	3.53877e-07	9.52616e-06	7.43746	6.66904	3.66667	84.4523	38.5	185.226
Glyma.05G025500.Wm82.a2.v1	194.287	-4.67996	3.54516e-07	9.53619e-06	381.599	366.284	350.333	25.7029	5	3.56203
Glyma.20G168500.Wm82.a2.v1	2596.86	3.22177	3.56691e-07	9.58747e-06	517.761	487.866	465.667	6174.2	1336	3207.61
Glyma.07G236600.Wm82.a2.v1	78.5385	-5.08241	3.57312e-07	9.59696e-06	158.475	146.719	148.667	1.83592	1	7.12407
Glyma.14G004600.Wm82.a2.v1	140.632	-3.72044	3.58286e-07	9.61589e-06	274.614	248.294	241.667	14.6874	6	24.9342
Glyma.07G271200.Wm82.a2.v1	79.3492	-5.08613	3.58701e-07	9.61982e-06	158.475	149.797	140.333	7.34368	0	1.78102
Glyma.06G184200.Wm82.a2.v1	13239	3.0343	3.6001e-07	9.64768e-06	2868	2892.83	2716.33	17808.4	6971	29386.8
Glyma.02G176100.Wm82.a2.v1	78.2467	4.1234	3.60846e-07	9.66285e-06	10.8701	6.15604	9.66667	189.1	50	106.861
Glyma.20G053400.Wm82.a2.v1	83.9455	-5.92104	3.62628e-07	9.70329e-06	143.028	187.246	163.667	5.50776	0.5	0
Glyma.05G123700.Wm82.a2.v1	2602.06	4.61083	3.63239e-07	9.71237e-06	207.105	202.123	184	1382.45	1467	8616.56
Glyma.13G243500.Wm82.a2.v1	325.735	8.89385	3.64841e-07	9.7479e-06	1.71634	1.02601	1	1.83592	188.5	1298.36
Glyma.11G225000.Wm82.a2.v1	2431.47	3.1302	3.65846e-07	9.76747e-06	523.483	473.502	457	3161.45	1252.5	5567.46
Glyma.01G165000.Wm82.a2.v1	89.5086	-5.60918	3.66155e-07	9.76842e-06	159.047	191.863	160	0	1.5	7.12407
Glyma.10G142700.Wm82.a2.v1	1529.93	2.79304	3.67617e-07	9.79352e-06	373.017	398.604	358	2610.68	710	2737.42
Glyma.17G082800.Wm82.a2.v1	83.3787	5.19493	3.67644e-07	9.79352e-06	6.86535	2.05201	6	253.357	47.5	71.2407
Glyma.03G130600.Wm82.a2.v1	112.541	-3.77104	3.68588e-07	9.81136e-06	211.681	207.766	203.667	14.6874	4.5	16.0291
Glyma.20G030300.Wm82.a2.v1	2312.77	3.33866	3.70734e-07	9.85416e-06	413.065	419.124	399.333	2680.44	1201	5738.43
Glyma.20G093700.Wm82.a2.v1	211.534	3.34049	3.70747e-07	9.85416e-06	30.3219	45.6573	37	323.122	115	447.035
Glyma.11G236700.Wm82.a2.v1	646.413	-3.76973	3.72061e-07	9.88174e-06	1250.07	1158.87	1097.67	132.186	23	44.5254
Glyma.06G295400.Wm82.a2.v1	1251.99	3.41722	3.74068e-07	9.92767e-06	221.407	207.253	209.667	3166.96	634	1412.35
Glyma.03G219400.Wm82.a2.v1	2657.29	2.78622	3.74876e-07	9.93437e-06	696.833	648.949	645.333	4907.41	1374	4375.96
Glyma.04G018400.Wm82.a2.v1	1101.77	3.21218	3.7463e-07	9.93437e-06	227.129	202.123	278.333	1397.13	718.5	2580.69
Glyma.08G342000.Wm82.a2.v1	201.167	3.35718	3.75492e-07	9.94331e-06	37.1873	34.3712	32.6667	275.388	113	457.721
Glyma.08G345400.Wm82.a2.v1	704.517	2.96462	3.7585e-07	9.94541e-06	157.903	162.109	157.667	1048.31	350.5	1449.75
Glyma.18G024600.Wm82.a2.v1	2408.89	3.79916	3.82871e-07	1.01237e-05	331.825	313.958	312.667	6822.28	1282	2167.5
Glyma.11G120300.Wm82.a2.v1	269.462	-3.13374	3.83214e-07	1.01253e-05	472.565	495.048	383	53.2417	9.5	56.9925
Glyma.14G074700.Wm82.a2.v1	127.006	-3.63042	3.86772e-07	1.02117e-05	244.864	225.208	221	18.3592	2.5	19.5912
Glyma.16G087300.Wm82.a2.v1	133.101	-4.54672	3.87166e-07	1.02146e-05	243.72	266.762	249.333	18.3592	3.5	3.56203
Glyma.20G193300.Wm82.a2.v1	57.822	-8.44159	3.88628e-07	1.02456e-05	118.427	112.861	111.333	0	0	0
Glyma.13G069200.Wm82.a2.v1	1688.29	3.93404	3.91044e-07	1.03017e-05	225.412	189.298	198.333	1422.84	943.5	4915.61
Glyma.17G051800.Wm82.a2.v1	5357.37	3.54967	3.92958e-07	1.03445e-05	837	849.02	833.333	14263.3	2918.5	5480.19
Glyma.02G270800.Wm82.a2.v1	537.055	3.55805	3.95361e-07	1.04001e-05	88.1053	80.0285	85.3333	581.986	305.5	1398.1
Glyma.08G218600.Wm82.a2.v1	4710.7	3.56454	3.96284e-07	1.04167e-05	707.703	760.784	696.333	12583.4	2441.5	4790.93
Glyma.13G247200.Wm82.a2.v1	252.125	4.08159	3.9669e-07	1.04197e-05	28.0335	28.2152	26.3333	218.474	131.5	733.779
Glyma.16G060800.Wm82.a2.v1	1692.47	-3.5009	4.00092e-07	1.05014e-05	3154.63	3065.71	2946.33	391.051	80	158.51
Glyma.08G139800.Wm82.a2.v1	16594.6	2.77789	4.01571e-07	1.05325e-05	4311.44	4135.32	3957	26343.6	8250.5	31588.1
Glyma.12G220000.Wm82.a2.v1	548.253	2.91228	4.04688e-07	1.06064e-05	130.442	126.712	165.333	1068.5	345.5	867.355
Glyma.01G188800.Wm82.a2.v1	25.7364	9.01279	4.07009e-07	1.06595e-05	0	0	0	47.7339	11.5	55.2115
Glyma.20G224700.Wm82.a2.v1	322.838	-3.29053	4.09669e-07	1.07213e-05	579.55	592.006	667	75.2727	19.5	44.5254
Glyma.03G202100.Wm82.a2.v1	5667.28	3.10165	4.10325e-07	1.07306e-05	1180.27	1185.04	1109.67	12991	3004.5	7312.85
Glyma.11G192400.Wm82.a2.v1	57.3829	-8.43055	4.12773e-07	1.07867e-05	121.288	108.244	114	0	0	0
Glyma.01G175800.Wm82.a2.v1	349.755	3.50115	4.18931e-07	1.09316e-05	61.216	52.3263	53.3333	879.405	176.5	406.072
Glyma.07G076100.Wm82.a2.v1	188.889	5.36702	4.18686e-07	1.09316e-05	9.15379	8.72106	9.66667	666.439	105.5	71.2407
Glyma.03G222300.Wm82.a2.v1	82.3841	-4.64092	4.19352e-07	1.09337e-05	166.485	150.31	158	9.1796	1.5	3.56203
Glyma.07G229000.Wm82.a2.v1	209.099	-3.47666	4.1962e-07	1.09337e-05	371.873	395.526	369.333	44.0621	10.5	24.9342
Glyma.10G256100.Wm82.a2.v1	1750.88	3.60376	4.22553e-07	1.09941e-05	271.181	261.119	258	1753.3	908	4717.91
Glyma.13G252600.Wm82.a2.v1	57.0377	-8.42187	4.2255e-07	1.09941e-05	117.855	110.296	115.667	0	0	0
Glyma.04G238300.Wm82.a2.v1	156.34	3.2845	4.23764e-07	1.10176e-05	26.8893	31.2932	27.3333	324.958	72	242.218
Glyma.06G070500.Wm82.a2.v1	3788.69	2.77028	4.253e-07	1.10494e-05	1015.5	921.867	918	6983.84	1799.5	6233.56
Glyma.15G038000.Wm82.a2.v1	1200.59	3.2458	4.27321e-07	1.10939e-05	221.98	235.982	210.667	2875.05	618.5	1469.34
Glyma.14G051800.Wm82.a2.v1	2004.61	3.41814	4.31636e-07	1.11978e-05	338.118	347.816	321.667	5124.05	1041	2208.46
Glyma.14G179000.Wm82.a2.v1	475.34	3.22353	4.40453e-07	1.14182e-05	91.5379	92.3406	90.6667	615.033	247.5	1102.45
Glyma.03G023000.Wm82.a2.v1	204.326	3.85812	4.42192e-07	1.14302e-05	23.4566	29.2412	25	554.448	119.5	210.16
Glyma.03G216000.Wm82.a2.v1	246.331	-4.55761	4.41688e-07	1.14302e-05	473.137	471.963	424.667	34.8825	6.5	5.34305
Glyma.09G049100.Wm82.a2.v1	1905.37	-4.39749	4.41811e-07	1.14302e-05	3656.37	3619.75	3357	291.911	46	53.4305
Glyma.20G159700.Wm82.a2.v1	46.4246	5.79414	4.42052e-07	1.14302e-05	2.28845	1.02601	1.33333	143.202	27.5	39.1824
Glyma.10G028900.Wm82.a2.v1	88.938	-4.2204	4.45787e-07	1.15139e-05	154.47	183.142	166.333	11.0155	3.5	7.12407
Glyma.15G122600.Wm82.a2.v1	107.287	-3.78995	4.46077e-07	1.15139e-05	204.244	195.967	195.667	14.6874	2	14.2481
Glyma.06G094900.Wm82.a2.v1	2024.8	2.80311	4.49212e-07	1.15781e-05	514.329	500.691	477.667	3192.66	1091	3891.52
Glyma.17G043300.Wm82.a2.v1	443.327	3.07355	4.49129e-07	1.15781e-05	89.2495	99.0096	91.3333	951.006	199	634.042
Glyma.08G042600.Wm82.a2.v1	492.187	3.6314	4.49556e-07	1.15786e-05	82.3841	64.6384	76.3333	1301.67	253	520.057
Glyma.13G162600.Wm82.a2.v1	1105.05	5.12255	4.53772e-07	1.16788e-05	56.6391	66.6904	49	3906.84	617	390.043
Glyma.06G261000.Wm82.a2.v1	74.633	-6.3496	4.62116e-07	1.1885e-05	153.326	141.589	124.333	1.83592	0.5	1.78102
Glyma.03G023100.Wm82.a2.v1	65.6033	5.69086	4.63676e-07	1.19166e-05	4.00479	1.02601	2.33333	209.295	51.5	48.0874
Glyma.13G110500.Wm82.a2.v1	1508.41	3.19165	4.67867e-07	1.20156e-05	309.513	285.743	319	1878.15	842	3560.25
Glyma.02G225400.Wm82.a2.v1	511.012	3.31216	4.74867e-07	1.21867e-05	91.5379	95.4186	105.333	1233.74	327	623.356
Glyma.11G225700.Wm82.a2.v1	99.0479	4.66865	4.85952e-07	1.24622e-05	5.72112	9.23406	6.33333	301.091	70	80.1457
Glyma.13G303700.Wm82.a2.v1	1929.49	2.85262	4.92236e-07	1.26143e-05	499.454	439.131	430.333	3838.91	922.5	2940.46
Glyma.12G016400.Wm82.a2.v1	1567.4	3.30031	4.98011e-07	1.27531e-05	299.215	278.561	281	3860.94	895	1830.88
Glyma.18G006800.Wm82.a2.v1	487.678	4.89606	5.00247e-07	1.28012e-05	27.4614	35.9102	8	220.31	75	1667.03
Glyma.04G235000.Wm82.a2.v1	132.864	3.74313	5.04441e-07	1.28993e-05	20.0239	16.9291	30.3333	157.889	94	336.612
Glyma.13G209500.Wm82.a2.v1	413.286	2.93728	5.06141e-07	1.29336e-05	100.12	90.8016	101.667	655.423	207.5	806.8
Glyma.17G149400.Wm82.a2.v1	3441.58	3.26803	5.08388e-07	1.29817e-05	678.525	616.117	650	8430.54	1747	4041.13
Glyma.13G198600.Wm82.a2.v1	51.2549	6.56916	5.12832e-07	1.30858e-05	0.572112	1.53901	1	174.412	32	28.4963
Glyma.08G209600.Wm82.a2.v1	124.018	-4.10446	5.13562e-07	1.30951e-05	227.129	241.625	247.667	20.1951	5	7.12407
Glyma.U017900.Wm82.a2.v1	7847.43	3.75127	5.14476e-07	1.31091e-05	1091.02	1078.85	1001.67	22231.1	4123.5	6988.71
Glyma.12G013000.Wm82.a2.v1	1037.87	3.19245	5.17093e-07	1.31663e-05	208.249	201.097	189	2449.12	521	1293.02
Glyma.11G081300.Wm82.a2.v1	68.3395	-5.62393	5.17963e-07	1.3171e-05	140.167	127.738	127.333	3.67184	0.5	1.78102
Glyma.12G040600.Wm82.a2.v1	887.465	2.87933	5.18012e-07	1.3171e-05	223.124	201.61	165.667	1767.99	361	1357.13
Glyma.14G214700.Wm82.a2.v1	94.6519	-4.48382	5.19773e-07	1.32064e-05	186.509	175.96	172	3.67184	3	12.4671
Glyma.17G162100.Wm82.a2.v1	258.298	3.10566	5.25906e-07	1.33527e-05	47.4853	60.0214	53.6667	402.066	134	523.619
Glyma.06G046000.Wm82.a2.v1	125.76	-3.68701	5.26727e-07	1.33641e-05	227.701	239.06	219.667	22.031	7	14.2481
Glyma.05G075100.Wm82.a2.v1	68.3807	-5.62946	5.34363e-07	1.35386e-05	122.432	145.693	128	1.83592	1.5	3.56203
Glyma.17G019300.Wm82.a2.v1	119.753	-8.04256	5.34215e-07	1.35386e-05	239.143	238.034	235	1.83592	0	0
Glyma.01G036300.Wm82.a2.v1	78.7919	-6.43389	5.36201e-07	1.35682e-05	165.913	145.693	145.667	0	0	3.56203
Glyma.03G123500.Wm82.a2.v1	340.608	3.15649	5.36292e-07	1.35682e-05	68.6535	68.7424	63.3333	466.323	166.5	758.713
Glyma.13G325000.Wm82.a2.v1	2953.72	3.88826	5.38489e-07	1.36142e-05	347.272	400.143	331.333	2449.12	1656	8618.34
Glyma.18G084000.Wm82.a2.v1	54.6901	-8.36131	5.40164e-07	1.36469e-05	106.413	112.348	130	0	0	0
Glyma.10G217900.Wm82.a2.v1	3275.1	3.4373	5.50262e-07	1.38911e-05	546.939	560.2	539	8513.16	1790.5	3480.11
Glyma.15G193200.Wm82.a2.v1	8770.82	2.70811	5.50608e-07	1.38911e-05	2291.31	2364.95	2249	14834.2	4600.5	15592.8
Glyma.08G173300.Wm82.a2.v1	697.802	4.70322	5.5205e-07	1.39177e-05	45.1969	57.9694	54.3333	2338.96	378.5	349.079
Glyma.06G031000.Wm82.a2.v1	27227.6	2.73467	5.55693e-07	1.39996e-05	7247.52	6977.87	6573	51251.5	13331	43433.6
Glyma.11G087100.Wm82.a2.v1	78.2773	-6.4141	5.58317e-07	1.40558e-05	149.893	159.544	126	3.67184	1	0
Glyma.20G215500.Wm82.a2.v1	70.6244	-4.91663	5.61589e-07	1.41282e-05	153.898	119.53	125	5.50776	2.5	3.56203
Glyma.08G345500.Wm82.a2.v1	234.709	4.39522	5.62988e-07	1.41535e-05	25.1729	17.4421	23.3333	727.024	123.5	169.197
Glyma.13G182100.Wm82.a2.v1	54.6411	-8.36008	5.65059e-07	1.41956e-05	99.5475	119.017	118	0	0	0
Glyma.02G001300.Wm82.a2.v1	621.149	3.14803	5.70306e-07	1.42985e-05	118.999	132.868	125.667	811.476	316	1421.25
Glyma.08G326300.Wm82.a2.v1	54.725	-8.36231	5.70356e-07	1.42985e-05	97.8312	121.069	153.667	0	0	0
Glyma.13G237200.Wm82.a2.v1	2043.89	2.78005	5.70057e-07	1.42985e-05	522.911	516.081	506	3932.54	1037	3204.05
Glyma.09G163100.Wm82.a2.v1	192.722	3.79333	5.73504e-07	1.43673e-05	25.1729	26.6762	22.6667	519.565	101.5	199.474
Glyma.12G204400.Wm82.a2.v1	262.902	-3.09409	5.76737e-07	1.44382e-05	451.969	489.405	467.667	53.2417	16	56.9925
Glyma.04G256300.Wm82.a2.v1	77.9168	-6.40727	5.83098e-07	1.45873e-05	160.764	147.232	142.667	3.67184	0.5	0
Glyma.10G278600.Wm82.a2.v1	7235.72	2.71634	5.84547e-07	1.46133e-05	1950.9	1871.44	1951.33	11887.6	3690	13233
Glyma.08G316500.Wm82.a2.v1	4625.54	2.70526	5.8521e-07	1.46196e-05	1231.19	1228.64	1139.67	8123.94	2266.5	7918.4
Glyma.03G040600.Wm82.a2.v1	73.4811	-4.70202	5.86883e-07	1.46205e-05	142.456	140.563	136.333	7.34368	3	3.56203
Glyma.04G023500.Wm82.a2.v1	106.454	-4.22629	5.85733e-07	1.46205e-05	193.946	210.331	193.667	5.50776	2	16.0291
Glyma.06G299200.Wm82.a2.v1	83.8285	-4.13282	5.86338e-07	1.46205e-05	160.764	156.466	151.333	9.1796	3.5	8.90508
Glyma.17G111400.Wm82.a2.v1	10553.1	3.28252	5.86692e-07	1.46205e-05	2007.54	1926.33	1829.33	26239	5289.5	12039.7
Glyma.20G151500.Wm82.a2.v1	25012.4	3.18026	5.93445e-07	1.47737e-05	5026.58	4914.06	4592.67	60095.1	12523.5	30013.7
Glyma.16G156100.Wm82.a2.v1	437.608	3.92944	5.95771e-07	1.48213e-05	55.4949	52.3263	56.6667	374.528	291.5	1268.08
Glyma.08G354300.Wm82.a2.v1	139.195	3.51698	5.98161e-07	1.48704e-05	20.596	24.1112	27.3333	328.63	73.5	183.445
Glyma.04G219100.Wm82.a2.v1	999.512	2.76251	6.0678e-07	1.50742e-05	263.172	250.346	250.667	1696.39	514.5	1788.14
Glyma.13G246600.Wm82.a2.v1	63.248	4.81534	6.11788e-07	1.51881e-05	4.5769	4.10403	4.33333	189.1	34.5	55.2115
Glyma.08G108500.Wm82.a2.v1	798.375	3.03578	6.12712e-07	1.52005e-05	176.783	170.317	162.333	1083.19	455.5	1763.21
Glyma.18G205800.Wm82.a2.v1	3988.36	3.0785	6.13273e-07	1.52038e-05	862.745	825.935	786	5081.82	2019.5	9182.92
Glyma.12G134300.Wm82.a2.v1	168.531	3.33273	6.21183e-07	1.53892e-05	33.1825	27.7022	32.6667	376.363	81	236.875
Glyma.01G203200.Wm82.a2.v1	93.2269	-4.46103	6.23832e-07	1.54442e-05	171.062	185.707	177.333	3.67184	3	12.4671
Glyma.08G339700.Wm82.a2.v1	109.255	-5.30784	6.28683e-07	1.55535e-05	223.696	202.636	204.667	0	2	10.6861
Glyma.07G165700.Wm82.a2.v1	883.015	3.39295	6.32985e-07	1.56491e-05	136.163	170.83	142.333	1000.58	449	2224.49
Glyma.08G227400.Wm82.a2.v1	1491.46	6.90754	6.3531e-07	1.56957e-05	25.1729	24.1112	24.6667	60.5853	853	5855.98
Glyma.09G188000.Wm82.a2.v1	333.532	-3.65322	6.36766e-07	1.57208e-05	615.593	620.221	626.667	71.6008	15	26.7152
Glyma.05G248500.Wm82.a2.v1	141.877	-3.73579	6.38716e-07	1.57581e-05	263.744	264.197	240	12.8514	5	26.7152
Glyma.18G072500.Wm82.a2.v1	5422.73	4.53129	6.41696e-07	1.58207e-05	460.55	438.618	437	2805.28	3262.5	17986.5
Glyma.14G223700.Wm82.a2.v1	225.756	4.054	6.44148e-07	1.58702e-05	24.6008	26.6762	26.6667	192.772	138	658.976
Glyma.16G003200.Wm82.a2.v1	923.604	2.78167	6.46588e-07	1.59193e-05	250.013	219.052	227	1665.18	445	1560.17
Glyma.11G037900.Wm82.a2.v1	77.9533	-4.56765	6.47398e-07	1.59283e-05	150.465	148.771	141.333	3.67184	2.5	8.90508
Glyma.10G268300.Wm82.a2.v1	5851.17	4.36345	6.48773e-07	1.59512e-05	534.925	549.427	497	18900.8	3190.5	3419.55
Glyma.20G120300.Wm82.a2.v1	66.4564	-5.58728	6.52486e-07	1.60314e-05	137.307	123.121	112.667	1.83592	1.5	3.56203
Glyma.11G190800.Wm82.a2.v1	1004.11	2.95927	6.54255e-07	1.60638e-05	228.273	229.312	231.333	2157.21	518.5	1401.66
Glyma.10G002500.Wm82.a2.v1	76.1772	3.98115	6.5668e-07	1.61123e-05	6.29323	11.7991	10	174.412	59	112.204
Glyma.03G214100.Wm82.a2.v1	7653.94	2.72312	6.58127e-07	1.61368e-05	2013.26	2013.54	1985.67	14417.5	3950.5	12171.5
Glyma.13G290100.Wm82.a2.v1	76.467	-6.37989	6.59891e-07	1.61689e-05	149.321	152.875	146	3.67184	0	0
Glyma.05G065100.Wm82.a2.v1	29.8409	5.75764	6.6103e-07	1.61857e-05	1.14422	1.02601	1.33333	47.7339	21.5	69.4596
Glyma.05G191000.Wm82.a2.v1	361.427	-4.56919	6.62951e-07	1.62106e-05	685.39	701.789	712	51.4057	6	7.12407
Glyma.15G054500.Wm82.a2.v1	52.8403	-8.31159	6.6279e-07	1.62106e-05	109.273	102.088	96.6667	0	0	0
Glyma.02G159900.Wm82.a2.v1	78.4941	-4.36889	6.66939e-07	1.62969e-05	147.605	151.849	216.333	9.1796	54	5.34305
Glyma.17G069200.Wm82.a2.v1	7421.53	4.60805	6.71425e-07	1.63953e-05	562.958	606.37	535.667	24926.3	3939.5	3590.53
Glyma.07G212000.Wm82.a2.v1	122.398	4.22838	6.762e-07	1.65007e-05	11.4422	13.3381	14.6667	356.168	60.5	108.642
Glyma.16G035000.Wm82.a2.v1	5420.36	2.99177	6.81333e-07	1.66146e-05	1195.71	1225.56	1267	12098.7	3223.5	7161.47
Glyma.02G206600.Wm82.a2.v1	138.062	3.39534	6.82793e-07	1.66275e-05	21.7403	26.1632	22.3333	308.434	77.5	195.912
Glyma.14G212700.Wm82.a2.v1	165.678	3.2099	6.82728e-07	1.66275e-05	34.8988	29.7542	31	345.153	78.5	252.904
Glyma.05G126800.Wm82.a2.v1	51.9674	6.54745	6.85867e-07	1.6691e-05	1.71634	0.513003	2.66667	27.5388	34.5	178.102
Glyma.14G205700.Wm82.a2.v1	8777.26	2.79525	6.87713e-07	1.67245e-05	2213.5	2207.45	2192.67	13022.2	4777	17665.9
Glyma.08G233300.Wm82.a2.v1	93.6558	-3.89962	6.92515e-07	1.68299e-05	175.638	175.447	161.333	12.8514	2.5	10.6861
Glyma.13G273800.Wm82.a2.v1	1312.95	3.32283	6.96492e-07	1.6915e-05	239.143	238.034	233.667	1479.75	703.5	3294.88
Glyma.16G016700.Wm82.a2.v1	268.606	3.00366	6.98685e-07	1.69568e-05	65.7929	53.3523	63	438.785	145	516.495
Glyma.10G181000.Wm82.a2.v1	98.8173	4.81224	6.99295e-07	1.696e-05	7.43746	6.15604	5.33333	315.778	57	65.8976
Glyma.08G354200.Wm82.a2.v1	268.965	3.51633	7.0102e-07	1.69904e-05	42.3363	44.1183	48.3333	686.634	205.5	302.773
Glyma.13G372000.Wm82.a2.v1	150.846	-4.12298	7.06399e-07	1.71091e-05	274.042	296.516	274.333	25.7029	4.5	7.12407
Glyma.10G044700.Wm82.a2.v1	1153.96	2.78058	7.08128e-07	1.71278e-05	293.494	292.925	279.333	1812.05	588	2217.37
Glyma.13G234800.Wm82.a2.v1	138.806	4.10093	7.07838e-07	1.71278e-05	12.5865	17.9551	16.6667	392.887	74	131.795
Glyma.19G230300.Wm82.a2.v1	52.4012	-8.29951	7.1034e-07	1.71581e-05	112.134	97.4706	88.3333	0	0	0
Glyma.20G101100.Wm82.a2.v1	1705.68	3.03923	7.09864e-07	1.71581e-05	364.435	375.518	362.333	2223.3	820.5	3859.46
Glyma.17G122000.Wm82.a2.v1	30.9648	5.81114	7.16315e-07	1.72907e-05	1.14422	1.02601	2	78.9445	19.5	42.7444
Glyma.17G023900.Wm82.a2.v1	60.748	6.20361	7.20937e-07	1.73905e-05	1.71634	1.53901	3	214.803	26	24.9342
Glyma.09G192900.Wm82.a2.v1	2699.62	2.7006	7.23788e-07	1.74475e-05	746.606	693.067	656.333	4630.19	1338	4728.6
Glyma.10G187300.Wm82.a2.v1	1541.87	2.71329	7.28971e-07	1.75606e-05	415.353	400.656	1400.67	2663.92	3506.5	2687.55
Glyma.01G028100.Wm82.a2.v1	85.6107	-4.49671	7.36131e-07	1.77177e-05	154.47	173.395	147.333	11.0155	2	3.56203
Glyma.16G115700.Wm82.a2.v1	3727.51	4.45996	7.36484e-07	1.77177e-05	343.839	304.211	314.667	2012.17	2200.5	12249.8
Glyma.10G261600.Wm82.a2.v1	51.8538	-8.28442	7.37217e-07	1.77235e-05	105.841	101.575	100.333	0	0	0
Glyma.08G159900.Wm82.a2.v1	51.8343	-8.28394	7.41757e-07	1.78086e-05	100.12	107.218	102	0	0	0
Glyma.17G202600.Wm82.a2.v1	81.4403	5.40778	7.41729e-07	1.78086e-05	2.86056	4.61703	3.33333	42.2261	41.5	276.058
Glyma.08G052500.Wm82.a2.v1	150.857	-4.50161	7.4394e-07	1.78491e-05	299.787	278.048	278	22.031	3.5	3.56203
Glyma.13G159700.Wm82.a2.v1	80.1876	-4.84344	7.4889e-07	1.79558e-05	150.465	159.544	122.333	1.83592	1	8.90508
Glyma.16G058900.Wm82.a2.v1	51.5087	-8.27482	7.64969e-07	1.8329e-05	102.408	103.627	97	0	0	0
Glyma.13G168500.Wm82.a2.v1	69.7109	-6.25001	7.68499e-07	1.84013e-05	131.586	143.641	138	1.83592	0.5	1.78102
Glyma.05G191100.Wm82.a2.v1	5867.63	3.6768	7.70147e-07	1.84284e-05	839.289	862.872	820.667	5267.25	3319.5	16501.1
Glyma.12G101200.Wm82.a2.v1	51.4691	-8.27367	7.71632e-07	1.84516e-05	105.841	100.036	84	0	0	0
Glyma.16G001900.Wm82.a2.v1	446.054	-2.90672	7.758e-07	1.85388e-05	812.971	761.297	706.667	111.991	36.5	97.9559
Glyma.10G199100.Wm82.a2.v1	220496	9.14576	7.78335e-07	1.8587e-05	783.794	770.531	710.333	86.2882	127687	880344
Glyma.03G205900.Wm82.a2.v1	98.8247	-4.72815	7.79657e-07	1.86061e-05	187.081	193.915	184.667	1.83592	3	12.4671
Glyma.01G225600.Wm82.a2.v1	51.4147	-8.27211	7.8683e-07	1.87648e-05	108.701	96.9576	101.667	0	0	0
Glyma.08G092000.Wm82.a2.v1	292.008	-3.13974	7.98059e-07	1.90199e-05	516.045	533.01	488.333	47.7339	18	71.2407
Glyma.12G183800.Wm82.a2.v1	14159.8	2.75009	8.00035e-07	1.90543e-05	3706.14	3623.34	3456.67	21397.6	6983.5	27912.1
Glyma.10G143200.Wm82.a2.v1	60.0477	5.16628	8.10046e-07	1.92798e-05	3.43267	3.07802	2.33333	190.936	33.5	42.7444
Glyma.20G007100.Wm82.a2.v1	50.9561	-8.2592	8.21245e-07	1.95334e-05	105.841	97.9836	90.3333	0	0	0
Glyma.12G222400.Wm82.a2.v1	142827	2.90678	8.2446e-07	1.95968e-05	34131.6	33085.6	31198	193827	70544.5	310262
Glyma.04G220900.Wm82.a2.v1	253.716	3.52243	8.28478e-07	1.96792e-05	52.0622	29.2412	37.6667	605.853	149.5	327.707
Glyma.18G245400.Wm82.a2.v1	129.704	-3.51808	8.34195e-07	1.98019e-05	228.845	248.294	232.333	23.8669	8.5	17.8102
Glyma.10G165700.Wm82.a2.v1	83.1896	-4.27714	8.37343e-07	1.98634e-05	167.629	148.771	157	11.0155	2	5.34305
Glyma.16G000200.Wm82.a2.v1	133.318	-3.43308	8.39021e-07	1.989e-05	245.436	242.651	245	22.031	7	23.1532
Glyma.11G248000.Wm82.a2.v1	51.1186	-8.26373	8.40832e-07	1.99197e-05	112.134	92.3406	91.6667	0	0	0
Glyma.07G121400.Wm82.a2.v1	148.008	10.1044	8.49262e-07	2.01061e-05	0	0.513003	0.333333	7.34368	90	584.173
Glyma.02G080100.Wm82.a2.v1	998.832	3.42903	8.53571e-07	2.01948e-05	172.206	167.239	182.667	1053.82	574	2602.06
Glyma.08G189500.Wm82.a2.v1	4452.49	-2.80496	8.56202e-07	2.02436e-05	7800.75	7779.69	6316	1299.83	210	929.691
Glyma.18G237400.Wm82.a2.v1	563.593	2.83286	8.57499e-07	2.02609e-05	128.153	149.284	134.333	1072.18	296	904.756
Glyma.09G056300.Wm82.a2.v1	3301.32	-3.79726	8.59142e-07	2.02863e-05	6194.83	6124.23	5646	690.306	125.5	195.912
Glyma.01G025500.Wm82.a2.v1	89.1978	-3.95116	8.67669e-07	2.04741e-05	165.34	169.804	157	9.1796	4	12.4671
Glyma.17G131600.Wm82.a2.v1	125.392	3.3401	8.72784e-07	2.05812e-05	18.8797	26.1632	23	198.279	70.5	258.247
Glyma.14G201300.Wm82.a2.v1	88.2944	-4.07021	8.77599e-07	2.06811e-05	177.927	155.44	149.667	7.34368	3	12.4671
Glyma.15G264100.Wm82.a2.v1	44.6189	4.87954	8.80461e-07	2.07349e-05	1.71634	4.10403	2.66667	115.663	27.5	56.9925
Glyma.13G099800.Wm82.a2.v1	290.285	-3.90089	8.9397e-07	2.10392e-05	542.362	545.836	499	56.9135	12.5	16.0291
Glyma.13G244800.Wm82.a2.v1	73.8976	-5.73371	8.96459e-07	2.10839e-05	141.312	148.771	132.667	5.50776	0.5	0
Glyma.10G283300.Wm82.a2.v1	892.834	2.87874	9.0781e-07	2.13368e-05	214.542	212.896	225	1859.79	441	1284.11
Glyma.14G156400.Wm82.a2.v1	118.448	8.16641	9.08447e-07	2.13378e-05	1.14422	0.513003	0.333333	5.50776	63	466.626
Glyma.10G150500.Wm82.a2.v1	229.381	-3.16522	9.0982e-07	2.1356e-05	418.214	407.325	396.667	38.5543	15	53.4305
Glyma.05G123900.Wm82.a2.v1	11492.3	5.1469	9.21789e-07	2.16227e-05	644.198	617.656	598.333	3284.46	6539.5	41422.9
Glyma.15G215600.Wm82.a2.v1	49.8219	-8.22681	9.33447e-07	2.18818e-05	96.687	102.601	89.6667	0	0	0
Glyma.12G062700.Wm82.a2.v1	49.7675	-8.2252	9.35106e-07	2.19064e-05	99.5475	99.5226	99	0	0	0
Glyma.18G017200.Wm82.a2.v1	3759.24	2.6741	9.41079e-07	2.20319e-05	1025.22	1011.64	920.333	6864.5	1938.5	6135.6
Glyma.06G226700.Wm82.a2.v1	482.492	3.47361	9.46546e-07	2.21309e-05	77.8073	81.5675	75.6667	1259.44	254	511.152
Glyma.14G054300.Wm82.a2.v1	49.6836	-8.22274	9.4622e-07	2.21309e-05	101.264	97.4706	94.3333	0	0	0
Glyma.13G357800.Wm82.a2.v1	459.29	-3.74527	9.5765e-07	2.23758e-05	826.702	882.879	784.667	97.3037	16	30.2773
Glyma.12G199600.Wm82.a2.v1	57.1092	7.08421	9.59178e-07	2.23969e-05	1.71634	0	1.66667	196.443	32	30.2773
Glyma.10G083100.Wm82.a2.v1	72.753	-6.30711	9.60278e-07	2.24079e-05	139.595	147.745	122.333	3.67184	0	0
Glyma.10G288700.Wm82.a2.v1	102.405	3.43559	9.61105e-07	2.24126e-05	17.7355	16.9291	0	150.545	0	224.408
Glyma.13G066500.Wm82.a2.v1	5419.67	2.81839	9.65196e-07	2.24934e-05	1321.01	1370.74	1360.33	7725.55	2889.5	11261.4
Glyma.05G247800.Wm82.a2.v1	106.134	3.28029	9.71459e-07	2.2612e-05	21.1681	18.4681	17.6667	185.428	48	199.474
Glyma.15G003300.Wm82.a2.v1	3536.68	5.0692	9.71553e-07	2.2612e-05	196.807	212.383	189.333	1090.54	2011	12647
Glyma.15G148500.Wm82.a2.v1	49.5063	-8.21766	9.75263e-07	2.26836e-05	94.3985	103.627	83.6667	0	0	0
Glyma.03G136000.Wm82.a2.v1	10714.2	2.86121	9.78867e-07	2.27526e-05	2588.81	2595.8	2436	14781	5581	22891.4
Glyma.12G142100.Wm82.a2.v1	91.214	-4.41348	9.80039e-07	2.27651e-05	169.917	178.525	165.333	12.8514	2	3.56203
Glyma.08G094500.Wm82.a2.v1	10511.4	2.70371	9.83994e-07	2.28421e-05	2797.63	2797.41	2672.33	20252	5393	16198.3
Glyma.18G046300.Wm82.a2.v1	67.2594	-6.19763	9.8533e-07	2.28582e-05	131.014	134.407	126.667	1.83592	0.5	1.78102
Glyma.12G075300.Wm82.a2.v1	311.049	4.22764	9.86861e-07	2.28789e-05	34.3267	28.7282	26.3333	963.858	160.5	217.284
Glyma.15G084200.Wm82.a2.v1	67.3084	-6.19864	9.9065e-07	2.29519e-05	137.879	127.738	123.333	1.83592	0.5	1.78102
Glyma.18G082100.Wm82.a2.v1	49.3284	-8.21237	9.92321e-07	2.29757e-05	102.408	94.9056	109	0	0	0
Glyma.08G196700.Wm82.a2.v1	469.357	2.79682	9.97656e-07	2.30843e-05	110.99	125.173	115	805.969	258.5	835.297
Glyma.16G218100.Wm82.a2.v1	264.103	-3.83485	1.0012e-06	2.31513e-05	497.738	489.405	494.667	53.2417	6.5	16.0291
Glyma.02G301500.Wm82.a2.v1	717.104	3.24803	1.00326e-06	2.31839e-05	126.437	146.719	138.667	844.523	359.5	1750.74
Glyma.03G216900.Wm82.a2.v1	25.4833	8.9979	1.00428e-06	2.31926e-05	0	0	0	73.4368	14	28.4963
Glyma.15G024600.Wm82.a2.v1	4434.78	3.33381	1.00679e-06	2.32356e-05	779.789	820.805	784.333	11399.2	2280.5	4739.28
Glyma.02G151900.Wm82.a2.v1	1893.66	3.81345	1.00845e-06	2.32588e-05	230.561	272.405	239.667	5513.27	985.5	1558.39
Glyma.14G089800.Wm82.a2.v1	104.815	-4.18813	1.01214e-06	2.33288e-05	181.932	215.461	180.667	16.5233	2.5	5.34305
Glyma.13G236100.Wm82.a2.v1	125.971	-3.68788	1.01412e-06	2.33593e-05	225.412	242.138	199.667	23.8669	2	12.4671
Glyma.19G076800.Wm82.a2.v1	1642.98	3.39102	1.0252e-06	2.35993e-05	292.349	279.587	277	4279.53	843.5	1720.46
Glyma.07G063800.Wm82.a2.v1	93.4605	-5.32342	1.03671e-06	2.38489e-05	163.052	201.61	160.333	9.1796	2.5	0
Glyma.19G024500.Wm82.a2.v1	72.1516	5.31485	1.04662e-06	2.40614e-05	4.00479	3.07802	2.66667	242.341	45	39.1824
Glyma.01G239500.Wm82.a2.v1	110.681	-4.70077	1.05018e-06	2.41279e-05	217.975	208.279	188.333	14.6874	2	1.78102
Glyma.02G260300.Wm82.a2.v1	183.593	5.17812	1.06059e-06	2.43512e-05	12.5865	7.18205	6.66667	73.4368	115.5	641.166
Glyma.17G257700.Wm82.a2.v1	48.845	-8.19813	1.06284e-06	2.43874e-05	103.552	91.8276	88.3333	0	0	0
Glyma.09G135100.Wm82.a2.v1	80.0414	-4.2271	1.0687e-06	2.4506e-05	151.61	152.362	141	5.50776	4	10.6861
Glyma.16G161000.Wm82.a2.v1	48.6281	-8.19175	1.07521e-06	2.46396e-05	100.12	94.3926	90	0	0	0
Glyma.05G102300.Wm82.a2.v1	71.6774	-6.28525	1.08155e-06	2.47372e-05	147.605	135.433	131	3.67184	1	0
Glyma.08G318000.Wm82.a2.v1	132.107	-3.68527	1.08121e-06	2.47372e-05	246.58	243.677	223.667	25.7029	6.5	12.4671
Glyma.18G029300.Wm82.a2.v1	11703.4	3.30283	1.08045e-06	2.47372e-05	2091.07	2216.17	2069	29914.5	5918	12591.8
Glyma.17G058900.Wm82.a2.v1	870.766	2.74032	1.08438e-06	2.47861e-05	242.576	210.844	233.333	1433.85	446	1595.79
Glyma.10G054700.Wm82.a2.v1	91.6692	-5.29476	1.0863e-06	2.48141e-05	183.076	174.421	167	9.1796	2	0
Glyma.13G151000.Wm82.a2.v1	201.055	-3.11564	1.09284e-06	2.49475e-05	365.008	356.024	344	42.2261	12	40.9634
Glyma.04G190900.Wm82.a2.v1	70.3463	-4.91875	1.09465e-06	2.49729e-05	129.297	143.128	151.667	1.83592	1	7.12407
Glyma.04G069100.Wm82.a2.v1	2151.43	2.7682	1.09615e-06	2.49913e-05	557.237	544.296	498	3181.65	994.5	4322.53
Glyma.02G165900.Wm82.a2.v1	69.9854	3.60764	1.09858e-06	2.50306e-05	12.0144	9.23406	8.66667	134.022	38	124.671
Glyma.07G016000.Wm82.a2.v1	373.6	3.3386	1.10355e-06	2.51259e-05	64.6487	69.7684	60	928.975	204	431.006
Glyma.18G058900.Wm82.a2.v1	5323.21	2.75349	1.10416e-06	2.51259e-05	1371.35	1378.44	1309	7832.03	2697	10711
Glyma.02G089900.Wm82.a2.v1	61.2206	6.80746	1.11553e-06	2.53683e-05	1.14422	1.02601	0	16.5233	33	226.189
Glyma.06G111900.Wm82.a2.v1	104.005	-7.84092	1.11717e-06	2.53895e-05	205.96	208.279	200.333	0	0	1.78102
Glyma.13G139000.Wm82.a2.v1	62.4902	-5.49214	1.11809e-06	2.53942e-05	117.283	127.225	112.667	3.67184	1.5	1.78102
Glyma.09G061900.Wm82.a2.v1	1224.56	3.34407	1.12988e-06	2.56457e-05	208.249	230.851	210	3139.42	644.5	1319.73
Glyma.15G079000.Wm82.a2.v1	94.9637	3.54305	1.135e-06	2.57294e-05	12.0144	17.9551	14	205.623	57	144.262
Glyma.17G088800.Wm82.a2.v1	48.5595	-8.18987	1.13477e-06	2.57294e-05	87.5332	106.705	100.333	0	0	0
Glyma.19G221700.Wm82.a2.v1	105.736	-5.23485	1.13739e-06	2.57672e-05	213.398	198.532	194.667	11.0155	0.5	0
Glyma.01G185800.Wm82.a2.v1	8155.43	3.70993	1.14141e-06	2.5842e-05	1173.97	1141.95	1122	23406.1	4479.5	6899.66
Glyma.18G069300.Wm82.a2.v1	48.2486	-8.18056	1.14354e-06	2.58737e-05	90.3937	102.601	139.333	0	0	0
Glyma.01G232500.Wm82.a2.v1	93.9093	-4.02287	1.1576e-06	2.61683e-05	192.23	161.596	159	14.6874	3	7.12407
Glyma.20G033900.Wm82.a2.v1	237.728	-3.27722	1.15803e-06	2.61683e-05	427.94	434.001	403	56.9135	15	32.0583
Glyma.01G213200.Wm82.a2.v1	112.798	-3.86133	1.16337e-06	2.62726e-05	217.403	204.688	205	20.1951	3.5	8.90508
Glyma.20G114200.Wm82.a2.v1	1537.9	-3.46834	1.165e-06	2.62928e-05	2778.18	2863.58	2618	372.692	79.5	137.138
Glyma.07G073900.Wm82.a2.v1	378.171	3.13682	1.16971e-06	2.63823e-05	74.3746	80.0285	66.6667	872.062	207.5	486.217
Glyma.07G019200.Wm82.a2.v1	122.526	3.97825	1.18385e-06	2.66844e-05	14.8749	14.3641	11.3333	343.317	64	117.547
Glyma.02G268000.Wm82.a2.v1	175.899	3.6384	1.18814e-06	2.67573e-05	29.7498	22.5721	21	457.144	89	194.131
Glyma.08G078300.Wm82.a2.v1	2005.04	2.77602	1.18858e-06	2.67573e-05	529.776	491.97	488	2944.81	1005	4053.59
Glyma.01G222400.Wm82.a2.v1	2229.43	2.65029	1.19053e-06	2.67844e-05	593.28	632.02	597.333	3818.71	1175	3873.71
Glyma.19G249100.Wm82.a2.v1	47.7403	-8.1652	1.19139e-06	2.67868e-05	95.5427	95.4186	88	0	0	0
Glyma.15G063400.Wm82.a2.v1	2055.64	4.06503	1.19726e-06	2.69017e-05	246.58	217	222.667	1398.97	1122.5	6360.01
Glyma.15G034900.Wm82.a2.v1	192.83	4.46728	1.19849e-06	2.69126e-05	14.8749	18.4681	11	616.869	112.5	121.109
Glyma.13G340300.Wm82.a2.v1	31876.9	2.88314	1.2012e-06	2.69565e-05	7526.14	7694.02	7162.67	42635.6	17269	69652
Glyma.17G064600.Wm82.a2.v1	70.6662	-6.26443	1.22134e-06	2.73912e-05	148.177	130.816	131.667	3.67184	0.5	0
Glyma.18G197300.Wm82.a2.v1	128.015	3.5629	1.22349e-06	2.74223e-05	24.6008	15.3901	19.3333	301.091	71	170.978
Glyma.18G284300.Wm82.a2.v1	15502.4	3.37861	1.23041e-06	2.75602e-05	2589.38	2849.73	3089	15847.7	9246	40722.9
Glyma.08G298800.Wm82.a2.v1	1484.16	2.66167	1.23413e-06	2.76262e-05	408.488	401.682	344.333	2643.72	659.5	2482.74
Glyma.13G340400.Wm82.a2.v1	164.488	5.3985	1.2423e-06	2.77903e-05	8.58168	6.66904	8.33333	51.4057	145.5	591.297
Glyma.16G133800.Wm82.a2.v1	132.16	3.20339	1.24302e-06	2.77903e-05	29.7498	22.0591	27	222.146	68.5	254.685
Glyma.03G233000.Wm82.a2.v1	374.608	2.87637	1.25329e-06	2.79855e-05	94.9706	84.6455	82.3333	743.547	218.5	575.268
Glyma.08G182500.Wm82.a2.v1	63.8826	-4.76699	1.25331e-06	2.79855e-05	121.288	125.173	126.333	5.50776	0	3.56203
Glyma.18G050800.Wm82.a2.v1	467.668	-2.99455	1.25595e-06	2.80267e-05	848.442	813.623	780.333	126.678	29.5	81.9268
Glyma.01G210400.Wm82.a2.v1	10644.3	3.90609	1.25962e-06	2.80911e-05	1370.21	1292.26	1259.33	32053.3	5579	7861.41
Glyma.13G145000.Wm82.a2.v1	437.277	-4.1239	1.29183e-06	2.87916e-05	846.154	807.98	735.667	78.9445	20	16.0291
Glyma.03G222000.Wm82.a2.v1	154.25	4.01961	1.2957e-06	2.88597e-05	13.7307	22.0591	18	436.949	81.5	144.262
Glyma.05G127700.Wm82.a2.v1	3738.86	3.03554	1.29894e-06	2.89139e-05	814.116	811.571	751.333	4606.32	1878.5	8723.42
Glyma.02G131500.Wm82.a2.v1	8456.36	3.0497	1.3003e-06	2.89263e-05	1797	1847.84	1735.33	10286.7	4289	19894
Glyma.11G069700.Wm82.a2.v1	105.663	7.62562	1.30494e-06	2.90115e-05	0.572112	1.53901	1.33333	7.34368	59.5	413.196
Glyma.11G140300.Wm82.a2.v1	132.214	3.11561	1.31254e-06	2.91622e-05	28.0335	26.6762	29	251.521	74	222.627
Glyma.19G114500.Wm82.a2.v1	505.556	-3.47	1.31761e-06	2.92567e-05	930.826	923.919	848.333	121.171	24.5	46.3064
Glyma.06G315300.Wm82.a2.v1	473.198	2.85246	1.32423e-06	2.93671e-05	128.153	102.088	133.333	743.547	329.5	919.004
Glyma.14G055200.Wm82.a2.v1	14311.7	3.48087	1.32412e-06	2.93671e-05	2480.11	2225.92	2197.33	13727.2	7492	38813.7
Glyma.07G092400.Wm82.a2.v1	3093.81	3.39067	1.33061e-06	2.94905e-05	515.473	561.739	478.333	8074.37	1671	3223.64
Glyma.09G284700.Wm82.a2.v1	435.328	-4.75541	1.33944e-06	2.96677e-05	834.14	844.916	797	56.9135	7.5	5.34305
Glyma.08G217300.Wm82.a2.v1	82.0903	3.72542	1.34862e-06	2.98524e-05	15.447	7.69505	16.6667	141.366	44.5	163.854
Glyma.11G068100.Wm82.a2.v1	75.3513	4.42143	1.35838e-06	3.00499e-05	5.72112	7.69505	6.66667	220.31	39.5	67.6786
Glyma.15G073000.Wm82.a2.v1	103.905	4.89823	1.36371e-06	3.01492e-05	6.29323	7.18205	7	345.153	58.5	56.9925
Glyma.20G152800.Wm82.a2.v1	73.5701	-4.47068	1.37746e-06	3.04345e-05	143.028	138.511	0	9.1796	0	3.56203
Glyma.04G097900.Wm82.a2.v1	23.1746	8.86096	1.37873e-06	3.04437e-05	0	0	0.333333	62.4213	16	30.2773
Glyma.19G088000.Wm82.a2.v1	1110.22	2.96748	1.38037e-06	3.04611e-05	254.59	248.807	246.333	2489.51	554	1447.97
Glyma.10G260600.Wm82.a2.v1	574.994	3.71943	1.40769e-06	3.10448e-05	70.9419	91.3146	80.3333	1624.79	300	512.933
Glyma.15G028600.Wm82.a2.v1	99.6879	-7.77678	1.4106e-06	3.10898e-05	207.105	189.811	179	1.83592	0	0
Glyma.03G179800.Wm82.a2.v1	135.19	-3.39529	1.41151e-06	3.10906e-05	231.705	262.145	232.333	20.1951	6	26.7152
Glyma.08G204300.Wm82.a2.v1	1496.55	2.96188	1.42128e-06	3.12691e-05	319.239	361.667	310	1953.42	747	3351.87
Glyma.19G209900.Wm82.a2.v1	74.1179	5.23175	1.42136e-06	3.12691e-05	5.14901	2.56502	4.66667	246.013	40	42.7444
Glyma.19G067600.Wm82.a2.v1	1199.76	3.83256	1.4227e-06	3.12793e-05	156.759	158.005	154	941.827	631	3542.44
Glyma.05G038300.Wm82.a2.v1	68.8385	-6.23683	1.43118e-06	3.14463e-05	143.028	128.764	121.333	0	1	3.56203
Glyma.14G020000.Wm82.a2.v1	268.105	-4.32107	1.44098e-06	3.16423e-05	514.901	506.334	492.333	44.0621	7	7.12407
Glyma.14G073300.Wm82.a2.v1	17864	3.30197	1.44276e-06	3.16618e-05	3306.24	3271.93	3037.33	18724.5	9242	46153.3
Glyma.06G154700.Wm82.a2.v1	47.6905	4.68144	1.44713e-06	3.17189e-05	5.14901	2.05201	2	123.007	30	60.5546
Glyma.10G157200.Wm82.a2.v1	90.2825	-4.39796	1.44641e-06	3.17189e-05	148.749	195.967	168.333	12.8514	1.5	3.56203
Glyma.08G346300.Wm82.a2.v1	150.987	-4.20976	1.4495e-06	3.17514e-05	291.777	281.126	259.333	25.7029	3	5.34305
Glyma.08G283100.Wm82.a2.v1	14454.2	3.33304	1.45259e-06	3.17996e-05	2538.46	2680.96	2797.33	14907.7	8191	37689.9
Glyma.06G268700.Wm82.a2.v1	731.344	-2.72885	1.45447e-06	3.18213e-05	1236.33	1305.59	1145	196.443	51	187.007
Glyma.15G260700.Wm82.a2.v1	98.8409	-7.76712	1.45653e-06	3.18468e-05	199.667	193.915	185.333	0	0.5	1.78102
Glyma.04G000600.Wm82.a2.v1	176.117	-4.46724	1.45963e-06	3.18952e-05	307.796	366.284	308.667	3.67184	5.5	26.7152
Glyma.09G261200.Wm82.a2.v1	731.623	-2.72222	1.46567e-06	3.20075e-05	1255.79	1285.59	1203.67	192.772	46.5	192.35
Glyma.02G004200.Wm82.a2.v1	46.5365	-8.12822	1.4735e-06	3.21485e-05	103.552	82.5935	86.3333	0	0	0
Glyma.13G253400.Wm82.a2.v1	952.747	2.79398	1.47393e-06	3.21485e-05	259.167	221.104	220	1913.03	464.5	1417.69
Glyma.04G193200.Wm82.a2.v1	86.2359	-3.89447	1.48052e-06	3.22531e-05	168.773	154.414	154	12.8514	3	8.90508
Glyma.12G205400.Wm82.a2.v1	217.45	-3.47061	1.47991e-06	3.22531e-05	389.036	408.864	367.333	22.031	10.5	49.8685
Glyma.13G279900.Wm82.a2.v1	27584.9	3.80579	1.49501e-06	3.25488e-05	3717.01	3646.43	3476	81694.7	14245.5	21281.4
Glyma.08G356200.Wm82.a2.v1	45.8414	-8.10665	1.50773e-06	3.28057e-05	91.5379	91.8276	82.3333	0	0	0
Glyma.08G077600.Wm82.a2.v1	59.5125	3.66885	1.52768e-06	3.32196e-05	9.15379	8.20805	6	113.827	29	106.861
Glyma.13G067800.Wm82.a2.v1	13418.1	2.94094	1.52953e-06	3.32397e-05	3087.12	3097	2849	17074	6922.5	30414.4
Glyma.13G100300.Wm82.a2.v1	3865.54	2.80132	1.53835e-06	3.34109e-05	1000.05	939.822	906.333	5386.59	1917.5	8135.68
Glyma.16G042000.Wm82.a2.v1	2718.63	2.85092	1.54311e-06	3.3494e-05	652.78	671.008	633.333	5867.6	1328	3683.14
Glyma.17G019400.Wm82.a2.v1	123.499	-3.44098	1.54499e-06	3.35145e-05	221.98	230.338	201.333	23.8669	5.5	17.8102
Glyma.01G188600.Wm82.a2.v1	268.506	-3.09671	1.54681e-06	3.35335e-05	503.459	458.112	429	67.929	12.5	44.5254
Glyma.15G029500.Wm82.a2.v1	775.428	4.25329	1.55209e-06	3.36126e-05	80.6678	73.8725	79.3333	2487.67	397.5	459.502
Glyma.18G293200.Wm82.a2.v1	228.396	8.08753	1.55233e-06	3.36126e-05	2.86056	0.513003	1	3.67184	126	906.537
Glyma.03G245100.Wm82.a2.v1	145.794	3.24003	1.55467e-06	3.36428e-05	34.3267	21.5461	27.3333	242.341	70.5	284.963
Glyma.04G247500.Wm82.a2.v1	863.394	2.80841	1.57081e-06	3.39715e-05	213.398	218.026	213	1242.92	419.5	1779.24
Glyma.03G038600.Wm82.a2.v1	73.4277	-4.46783	1.58359e-06	3.42271e-05	127.581	153.388	141	9.1796	2	3.56203
Glyma.02G049700.Wm82.a2.v1	1591.2	2.68416	1.58613e-06	3.42614e-05	464.555	392.448	401	2948.49	837.5	2559.32
Glyma.05G206200.Wm82.a2.v1	12511.4	3.44637	1.59595e-06	3.44527e-05	2071.62	2133.58	3162.33	33850.7	8571.5	11989.8
Glyma.08G150900.Wm82.a2.v1	251.564	6.87142	1.61038e-06	3.47431e-05	2.86056	5.64304	5.33333	12.8514	135	984.902
Glyma.07G129900.Wm82.a2.v1	96.8532	-7.7377	1.6159e-06	3.48413e-05	192.23	193.402	169.333	0	0.5	1.78102
Glyma.02G016100.Wm82.a2.v1	21124.6	3.19424	1.62036e-06	3.49163e-05	4241.07	4081.45	3847.33	52885.5	10556	23290.4
Glyma.14G051900.Wm82.a2.v1	49.3731	6.92579	1.62595e-06	3.50156e-05	0.572112	1.02601	2	178.084	22	17.8102
Glyma.14G088700.Wm82.a2.v1	1735.23	4.0764	1.64782e-06	3.54654e-05	184.22	204.175	172	5425.14	882	1127.38
Glyma.02G214600.Wm82.a2.v1	59.776	5.57932	1.65253e-06	3.55452e-05	2.86056	2.05201	1	29.3747	37	204.817
Glyma.17G032000.Wm82.a2.v1	107.221	-3.60958	1.66218e-06	3.57315e-05	202.528	193.915	203.667	12.8514	3.5	19.5912
Glyma.10G060200.Wm82.a2.v1	154.909	-3.78821	1.66682e-06	3.58097e-05	288.917	288.821	276.333	31.2106	6.5	10.6861
Glyma.10G099700.Wm82.a2.v1	109.51	-3.72314	1.67124e-06	3.5883e-05	187.081	220.078	184.333	20.1951	4.5	10.6861
Glyma.06G324100.Wm82.a2.v1	36.3261	8.05544	1.701e-06	3.64781e-05	0.572112	0	0	75.2727	26	69.4596
Glyma.20G061300.Wm82.a2.v1	98.5029	-3.97258	1.7009e-06	3.64781e-05	163.624	206.74	194	16.5233	3.5	7.12407
Glyma.01G144300.Wm82.a2.v1	962.035	2.69618	1.71176e-06	3.6687e-05	251.729	262.658	225.333	1835.92	439.5	1497.83
Glyma.02G270500.Wm82.a2.v1	89.6945	3.7873	1.71619e-06	3.67597e-05	10.8701	13.3381	10.6667	229.49	44	105.08
Glyma.13G152300.Wm82.a2.v1	331.788	3.183	1.74381e-06	3.7321e-05	67.5092	64.1254	60	789.445	167.5	406.072
Glyma.15G143000.Wm82.a2.v1	2648.96	2.60186	1.74448e-06	3.7321e-05	730.587	767.966	731.333	4521.87	1500	4575.43
Glyma.19G228500.Wm82.a2.v1	104.933	8.59399	1.74651e-06	3.73422e-05	0.572112	0.513003	1	3.67184	61.5	414.977
Glyma.02G137200.Wm82.a2.v1	5904.31	3.62414	1.75696e-06	3.75431e-05	886.774	884.931	844.667	5048.78	3113.5	16796.8
Glyma.13G323000.Wm82.a2.v1	84.263	-4.67088	1.761e-06	3.76068e-05	149.321	174.934	153.667	11.0155	1.5	1.78102
Glyma.15G175100.Wm82.a2.v1	70.8056	4.56736	1.76703e-06	3.77131e-05	6.86535	4.61703	9.66667	212.967	38	58.7735
Glyma.04G060300.Wm82.a2.v1	1917.93	2.81752	1.78712e-06	3.81192e-05	490.872	462.216	517.667	2641.89	1071	4076.75
Glyma.04G177700.Wm82.a2.v1	232.568	-3.0309	1.80139e-06	3.83685e-05	430.228	398.604	364	56.9135	16.5	44.5254
Glyma.07G027200.Wm82.a2.v1	44.6771	-8.06943	1.80012e-06	3.83685e-05	96.1148	82.5935	92.3333	0	0	0
Glyma.15G104200.Wm82.a2.v1	763.565	2.92414	1.80203e-06	3.83685e-05	179.071	176.473	173	1683.54	375.5	1015.18
Glyma.15G121400.Wm82.a2.v1	67.0309	-4.3334	1.84644e-06	3.92908e-05	128.725	126.712	115.667	7.34368	2	5.34305
Glyma.02G245600.Wm82.a2.v1	44.6481	-8.06872	1.85008e-06	3.93447e-05	80.0957	98.4966	77.3333	0	0	0
Glyma.13G080100.Wm82.a2.v1	2006.67	3.10112	1.85275e-06	3.93693e-05	437.666	400.143	468.667	2346.3	1552	4842.58
Glyma.15G026400.Wm82.a2.v1	1987.37	6.77336	1.85344e-06	3.93693e-05	36.6152	35.3972	32.3333	60.5853	1130.5	7816.88
Glyma.04G253000.Wm82.a2.v1	4026.57	3.9495	1.85699e-06	3.9398e-05	489.728	489.405	450.333	2772.24	2186	12354.9
Glyma.08G123000.Wm82.a2.v1	37.3391	8.10832	1.8562e-06	3.9398e-05	0	0.513003	0.333333	93.6319	19.5	55.2115
Glyma.08G306500.Wm82.a2.v1	90.9376	5.76801	1.86055e-06	3.94501e-05	4.00479	2.56502	3	330.465	43.5	26.7152
Glyma.10G262800.Wm82.a2.v1	67.802	-4.35412	1.90002e-06	4.02631e-05	114.422	144.154	106	5.50776	0.5	7.12407
Glyma.17G235000.Wm82.a2.v1	294.425	4.04903	1.9017e-06	4.02749e-05	33.7546	33.3452	86	212.967	278	897.632
Glyma.05G173300.Wm82.a2.v1	174.11	-3.55772	1.90523e-06	4.03256e-05	318.666	323.192	317.667	38.5543	6.5	16.0291
Glyma.08G058400.Wm82.a2.v1	3530.86	2.67569	1.91347e-06	4.04761e-05	917.096	994.2	909.667	5291.12	1715.5	6921.03
Glyma.04G030900.Wm82.a2.v1	30634	2.58698	1.91817e-06	4.05276e-05	8907.79	8576.39	8009.67	49211.8	14665	55840.2
Glyma.20G168800.Wm82.a2.v1	334.385	3.46832	1.9181e-06	4.05276e-05	54.9228	55.9174	64.6667	343.317	226.5	883.384
Glyma.05G169100.Wm82.a2.v1	93.7795	-7.68825	1.92027e-06	4.0548e-05	181.932	191.35	177.333	1.83592	0	0
Glyma.06G021200.Wm82.a2.v1	127.097	4.29595	1.93691e-06	4.08752e-05	9.72591	14.8771	8.66667	97.3037	66	386.481
Glyma.15G276200.Wm82.a2.v1	107.422	3.66442	1.93852e-06	4.0885e-05	16.0191	15.3901	15	275.388	48.5	122.89
Glyma.08G323200.Wm82.a2.v1	66.0201	-6.16496	1.944e-06	4.09765e-05	132.158	128.251	133.333	3.67184	0.5	0
Glyma.04G222100.Wm82.a2.v1	43.8685	-8.04323	1.9555e-06	4.11945e-05	84.6726	90.8016	79	0	0	0
Glyma.11G195200.Wm82.a2.v1	66.3848	-6.17291	1.96224e-06	4.13123e-05	141.312	120.556	122.667	3.67184	1	0
Glyma.13G010100.Wm82.a2.v1	1487.25	2.61362	1.99577e-06	4.19935e-05	410.204	425.28	393	2449.12	779	2664.4
Glyma.18G099000.Wm82.a2.v1	616.013	2.69711	2.00123e-06	4.20835e-05	157.331	171.856	172.333	993.232	409	1141.63
Glyma.15G252200.Wm82.a2.v1	2866.33	4.0117	2.00499e-06	4.21378e-05	340.979	328.322	322	8917.06	1583.5	1878.97
Glyma.06G123200.Wm82.a2.v1	92.9656	-7.67561	2.00855e-06	4.21878e-05	180.215	189.811	162	1.83592	0.5	0
Glyma.16G012500.Wm82.a2.v1	70.1749	-4.40931	2.0136e-06	4.22691e-05	137.307	130.816	132.333	3.67184	2.5	8.90508
Glyma.11G004800.Wm82.a2.v1	296.591	3.41021	2.02065e-06	4.2392e-05	48.6295	53.3523	46	765.578	155	318.802
Glyma.15G115000.Wm82.a2.v1	83.6034	-4.29632	2.03997e-06	4.27725e-05	165.913	152.362	166.333	3.67184	3.5	12.4671
Glyma.13G056600.Wm82.a2.v1	3048.05	2.63137	2.04224e-06	4.27948e-05	847.298	846.968	844.667	5797.83	1562	4700.1
Glyma.17G056300.Wm82.a2.v1	330.34	3.89737	2.05453e-06	4.30271e-05	34.3267	48.7353	39	969.365	180.5	268.933
Glyma.16G156800.Wm82.a2.v1	47.0942	5.5964	2.05735e-06	4.30358e-05	2.28845	1.53901	2	156.053	22.5	28.4963
Glyma.16G200100.Wm82.a2.v1	43.5181	-8.03155	2.0565e-06	4.30358e-05	90.9658	83.1065	83	0	0	0
Glyma.03G255100.Wm82.a2.v1	2608.17	3.53046	2.06558e-06	4.31828e-05	421.075	409.89	384	2331.62	1447	7270.11
Glyma.U012000.Wm82.a2.v1	533.167	2.70934	2.07543e-06	4.33632e-05	135.591	147.232	144.667	991.396	292.5	858.45
Glyma.20G026700.Wm82.a2.v1	56.1721	5.34912	2.07736e-06	4.33783e-05	2.28845	3.07802	3.33333	187.264	27	32.0583
Glyma.05G098200.Wm82.a2.v1	2220.13	2.86466	2.08817e-06	4.35785e-05	560.098	511.977	518.333	2933.8	1090.5	4874.64
Glyma.14G099200.Wm82.a2.v1	81.3253	-4.09202	2.08952e-06	4.35812e-05	149.321	158.005	150	5.50776	3	12.4671
Glyma.19G177200.Wm82.a2.v1	4121.34	2.58457	2.09494e-06	4.36688e-05	1125.92	1229.67	949.667	7297.78	1816.5	6831.98
Glyma.06G162700.Wm82.a2.v1	70.6552	-4.40965	2.1025e-06	4.37868e-05	134.446	135.433	125	9.1796	2.5	3.56203
Glyma.18G123800.Wm82.a2.v1	455.947	2.93681	2.10305e-06	4.37868e-05	102.408	108.244	99.6667	996.904	249.5	616.232
Glyma.05G018000.Wm82.a2.v1	3481.62	4.82252	2.1171e-06	4.40537e-05	246.58	228.799	238.667	1160.3	2164.5	12290.8
Glyma.17G225000.Wm82.a2.v1	28.1745	9.14388	2.12387e-06	4.41688e-05	0	0	0.333333	16.5233	12.5	96.1749
Glyma.08G132200.Wm82.a2.v1	1241.59	3.90811	2.1338e-06	4.43495e-05	156.759	153.388	134	3772.81	640.5	883.384
Glyma.20G128600.Wm82.a2.v1	325.735	-2.88112	2.1445e-06	4.45461e-05	557.237	589.954	554.667	86.2882	19.5	69.4596
Glyma.07G195300.Wm82.a2.v1	30737.7	2.8695	2.15028e-06	4.46402e-05	7525.56	7273.36	6884.67	39598.9	15341.5	68553.1
Glyma.04G145700.Wm82.a2.v1	239.925	3.32674	2.15451e-06	4.46766e-05	42.3363	44.6313	49.3333	596.674	123	276.058
Glyma.10G172100.Wm82.a2.v1	2192.79	2.63807	2.15453e-06	4.46766e-05	623.03	590.98	590	4178.55	1084.5	3378.59
Glyma.09G051200.Wm82.a2.v1	613.189	3.28601	2.173e-06	4.50333e-05	117.283	110.809	161.333	660.931	475	1563.73
Glyma.02G009600.Wm82.a2.v1	197.679	-3.08573	2.17722e-06	4.50727e-05	351.849	355.511	470	47.7339	18	35.6203
Glyma.02G052700.Wm82.a2.v1	43.1481	-8.01921	2.17742e-06	4.50727e-05	91.5379	81.0545	85.3333	0	0	0
Glyma.13G142400.Wm82.a2.v1	25095.4	2.55345	2.1817e-06	4.51351e-05	7358.51	7252.33	6595.67	42128.8	11609	43642
Glyma.18G093200.Wm82.a2.v1	2317.32	2.59272	2.18441e-06	4.51651e-05	652.208	665.878	638	4193.24	1195	3757.94
Glyma.14G218100.Wm82.a2.v1	76.2042	-3.98967	2.18981e-06	4.52507e-05	144.172	142.615	150	7.34368	2.5	10.6861
Glyma.10G162300.Wm82.a2.v1	191.091	-4.10714	2.20365e-06	4.55102e-05	338.118	384.239	339	34.8825	5	7.12407
Glyma.14G061300.Wm82.a2.v1	1865.53	2.65468	2.20973e-06	4.56095e-05	518.334	504.282	455	3611.25	959	2828.25
Glyma.07G130800.Wm82.a2.v1	66.3952	-5.57592	2.22546e-06	4.59076e-05	133.874	126.199	114.333	5.50776	0.5	0
Glyma.02G157900.Wm82.a2.v1	39147.9	3.75968	2.22936e-06	4.59616e-05	5493.42	5272.65	5012.67	29763.9	20622.5	116062
Glyma.09G182100.Wm82.a2.v1	541.177	3.42876	2.23067e-06	4.59621e-05	86.961	96.9576	0	1439.36	0	541.429
Glyma.16G032200.Wm82.a2.v1	69.4414	4.54437	2.2445e-06	4.62204e-05	6.29323	5.13003	2.33333	211.131	38.5	55.2115
Glyma.06G123900.Wm82.a2.v1	273.231	3.7453	2.26209e-06	4.65318e-05	38.9036	36.9362	34.6667	778.43	132	238.656
Glyma.13G256000.Wm82.a2.v1	259.268	2.81027	2.26223e-06	4.65318e-05	60.6439	68.7424	53.3333	455.308	128.5	452.378
Glyma.07G220000.Wm82.a2.v1	100.42	4.06621	2.28194e-06	4.69104e-05	10.298	12.3121	9.66667	288.239	50.5	90.8318
Glyma.10G028000.Wm82.a2.v1	4434.63	4.11453	2.31364e-06	4.75347e-05	482.863	485.301	504.667	2630.87	2532.5	14139.5
Glyma.03G238800.Wm82.a2.v1	59.3973	7.76987	2.31664e-06	4.7569e-05	0.572112	0.513003	0.666667	225.818	28.5	10.6861
Glyma.13G222300.Wm82.a2.v1	70260.4	3.29497	2.31873e-06	4.75846e-05	13077.3	12909.2	11920	70842.6	36007	184212
Glyma.08G201300.Wm82.a2.v1	1927.31	-3.71048	2.33524e-06	4.78959e-05	3555.1	3606.93	3318	431.441	71.5	115.766
Glyma.02G102800.Wm82.a2.v1	664.502	-4.2635	2.35056e-06	4.81594e-05	1299.27	1227.1	1178	113.827	17.5	17.8102
Glyma.19G026600.Wm82.a2.v1	58.3671	6.38151	2.35078e-06	4.81594e-05	2.28845	0.513003	1.33333	209.295	37	21.3722
Glyma.03G147900.Wm82.a2.v1	680.029	-3.39183	2.35917e-06	4.83036e-05	1260.94	1222.49	1136.67	172.576	33.5	64.1166
Glyma.02G106100.Wm82.a2.v1	3490.04	3.63271	2.36173e-06	4.83282e-05	527.487	514.029	490.667	2889.74	1774	10028.9
Glyma.15G057900.Wm82.a2.v1	36.8112	7.07565	2.39413e-06	4.89633e-05	0.572112	0.513003	0	123.007	19	23.1532
Glyma.09G090300.Wm82.a2.v1	824.172	2.87134	2.39633e-06	4.89801e-05	196.807	199.558	204.667	1099.72	502	1800.61
Glyma.02G242400.Wm82.a2.v1	98.4594	-3.8702	2.41495e-06	4.93326e-05	187.081	181.603	195	7.34368	4	17.8102
Glyma.12G081100.Wm82.a2.v1	837.409	3.18031	2.4393e-06	4.98015e-05	157.331	175.447	186	2078.26	517	938.596
Glyma.10G167300.Wm82.a2.v1	91.7012	-3.75804	2.44675e-06	4.99251e-05	168.201	173.395	165.667	9.1796	2	16.0291
Glyma.07G199200.Wm82.a2.v1	847.306	2.91137	2.45288e-06	5.00217e-05	184.22	213.409	189.333	1114.4	436.5	1877.19
Glyma.10G215800.Wm82.a2.v1	87.2218	-3.90957	2.45621e-06	5.0061e-05	156.759	170.317	147.333	14.6874	0.5	7.12407
Glyma.07G037300.Wm82.a2.v1	81.1122	-3.80231	2.462e-06	5.01505e-05	159.619	143.128	151	11.0155	5	10.6861
Glyma.09G281700.Wm82.a2.v1	5577.05	2.56903	2.50086e-06	5.09129e-05	1595.05	1622.12	1586.67	10194.9	2722.5	8896.18
Glyma.09G264600.Wm82.a2.v1	71.0132	-4.66177	2.51011e-06	5.10723e-05	137.879	135.433	104.667	1.83592	0	8.90508
Glyma.07G218100.Wm82.a2.v1	41.9844	-7.97989	2.51482e-06	5.11389e-05	81.2399	86.6976	85.3333	0	0	0
Glyma.11G054100.Wm82.a2.v1	113.68	-3.3842	2.5203e-06	5.12213e-05	208.249	206.74	204.333	18.3592	6.5	21.3722
Glyma.02G081600.Wm82.a2.v1	82.0997	-3.82338	2.5447e-06	5.16878e-05	163.624	143.128	244.667	9.1796	5	12.4671
Glyma.07G063700.Wm82.a2.v1	41.94	-7.97839	2.54986e-06	5.17632e-05	79.5236	88.2366	84.6667	0	0	0
Glyma.10G257100.Wm82.a2.v1	791.714	2.66112	2.57603e-06	5.22649e-05	232.278	200.071	288	1272.29	507.5	1462.21
Glyma.20G220100.Wm82.a2.v1	3851.54	4.19054	2.6098e-06	5.29199e-05	438.81	361.154	378.667	2146.19	2106.5	12460
Glyma.09G010700.Wm82.a2.v1	10317	2.56014	2.61969e-06	5.30903e-05	2946.95	3035.95	2954	18865.9	4983.5	16419.2
Glyma.07G040100.Wm82.a2.v1	238.533	-2.96511	2.62264e-06	5.31199e-05	406.2	439.644	385	47.7339	14	60.5546
Glyma.08G365100.Wm82.a2.v1	707.088	-3.22784	2.62434e-06	5.31242e-05	1327.87	1227.62	1204.33	190.936	36	81.9268
Glyma.09G062500.Wm82.a2.v1	63.063	-6.10885	2.63652e-06	5.33407e-05	123.004	125.686	111.333	0	0	3.56203
Glyma.03G251900.Wm82.a2.v1	75.7783	-3.97825	2.64242e-06	5.34298e-05	161.908	123.121	147.333	9.1796	3	8.90508
Glyma.16G205200.Wm82.a2.v1	211.624	-3.101	2.64973e-06	5.35473e-05	391.897	366.284	354	34.8825	12.5	53.4305
Glyma.12G033400.Wm82.a2.v1	37.7429	7.11194	2.67116e-06	5.39498e-05	0.572112	0.513003	2.33333	128.514	19	21.3722
Glyma.16G008600.Wm82.a2.v1	108.322	-3.89683	2.70235e-06	5.4549e-05	220.263	185.707	186	20.1951	5	7.12407
Glyma.02G158200.Wm82.a2.v1	67869.8	4.07929	2.7041e-06	5.45536e-05	7713.79	7449.32	7557	40122.2	37183.5	216194
Glyma.09G127300.Wm82.a2.v1	86.4627	4.88561	2.716e-06	5.47628e-05	5.14901	6.15604	4.66667	288.239	44.5	46.3064
Glyma.04G035100.Wm82.a2.v1	204.042	-4.27305	2.71872e-06	5.47867e-05	370.157	405.786	362.333	34.8825	5	5.34305
Glyma.02G062500.Wm82.a2.v1	99.7604	-3.8772	2.72673e-06	5.4917e-05	179.643	193.915	188	18.3592	3.5	7.12407
Glyma.13G238500.Wm82.a2.v1	2985.57	3.20392	2.73219e-06	5.49961e-05	585.843	583.285	561	7615.39	1510	3157.74
Glyma.13G118600.Wm82.a2.v1	86.5571	-3.77566	2.76441e-06	5.55509e-05	158.475	164.161	156.667	14.6874	2.5	8.90508
Glyma.13G208600.Wm82.a2.v1	467.03	2.77869	2.76328e-06	5.55509e-05	114.995	122.608	115.333	684.798	246	945.72
Glyma.17G047200.Wm82.a2.v1	85.4667	4.71437	2.76343e-06	5.55509e-05	7.43746	5.13003	7.66667	53.2417	48	276.058
Glyma.17G026900.Wm82.a2.v1	96.6333	-3.53183	2.77015e-06	5.56347e-05	176.211	179.551	175.333	16.5233	7	14.2481
Glyma.17G136600.Wm82.a2.v1	135.352	-3.66442	2.7717e-06	5.56347e-05	250.013	251.885	234.333	11.0155	5	28.4963
Glyma.16G085700.Wm82.a2.v1	154.756	-3.13375	2.77534e-06	5.56766e-05	264.316	291.386	280.333	33.0465	9.5	30.2773
Glyma.19G243000.Wm82.a2.v1	1098.22	3.96515	2.79361e-06	5.60117e-05	130.442	133.894	131	3400.12	602.5	728.436
Glyma.04G079200.Wm82.a2.v1	24010.4	5.09558	2.82017e-06	5.65125e-05	1414.26	1314.83	1275	5645.45	13217	87667
Glyma.12G018100.Wm82.a2.v1	5608.27	3.61892	2.87766e-06	5.76323e-05	861.029	827.474	803.333	16176.3	2907	4568.31
Glyma.18G198800.Wm82.a2.v1	94.7609	3.74862	2.89459e-06	5.79388e-05	16.0191	10.2601	11.6667	242.341	41.5	110.423
Glyma.10G274300.Wm82.a2.v1	72.7242	3.50432	2.91928e-06	5.84003e-05	9.15379	14.3641	13.3333	126.678	42.5	140.7
Glyma.07G133500.Wm82.a2.v1	86.3314	-7.56821	2.92239e-06	5.84297e-05	171.634	171.856	164.333	1.83592	0	0
Glyma.05G012300.Wm82.a2.v1	17613	5.49445	2.9241e-06	5.84314e-05	790.659	738.212	685.667	2607.01	10396.5	66316.1
Glyma.05G229300.Wm82.a2.v1	122.874	-3.89683	2.95937e-06	5.91003e-05	231.705	228.799	228	23.8669	7	7.12407
Glyma.06G270300.Wm82.a2.v1	4685.06	2.81488	2.96106e-06	5.91003e-05	1149.37	1182.47	1158	10299.5	2345	6108.89
Glyma.16G127900.Wm82.a2.v1	109.238	-4.24794	2.96254e-06	5.91003e-05	203.672	211.357	238.333	18.3592	16	3.56203
Glyma.05G215700.Wm82.a2.v1	441.034	3.87348	2.96506e-06	5.91177e-05	57.7833	54.8914	56	1325.53	229.5	325.926
Glyma.12G171400.Wm82.a2.v1	160.694	-4.62276	2.96997e-06	5.91825e-05	314.09	303.698	280	1.83592	1.5	23.1532
Glyma.01G240900.Wm82.a2.v1	92.1793	-5.05623	2.97204e-06	5.91908e-05	173.35	184.681	170.333	0	2.5	10.6861
Glyma.04G104900.Wm82.a2.v1	356.859	-3.32991	2.98538e-06	5.93958e-05	633.9	664.339	595.667	91.796	17.5	37.4013
Glyma.12G228300.Wm82.a2.v1	40.8496	-7.94023	2.98566e-06	5.93958e-05	86.961	76.4375	69	0	0	0
Glyma.02G260400.Wm82.a2.v1	52.7319	4.95429	2.99844e-06	5.96169e-05	4.5769	2.05201	3.33333	42.2261	30	162.072
Glyma.14G214500.Wm82.a2.v1	58.5591	-4.96758	3.00567e-06	5.96942e-05	116.139	110.809	123.333	5.50776	1.5	1.78102
Glyma.18G291500.Wm82.a2.v1	2505.74	2.93182	3.00558e-06	5.96942e-05	569.824	591.493	565.333	3073.33	1273	5788.3
Glyma.06G325300.Wm82.a2.v1	230.7	-3.24196	3.0202e-06	5.99496e-05	431.945	402.708	391	29.3747	14	58.7735
Glyma.17G116100.Wm82.a2.v1	80.5276	-3.92146	3.02275e-06	5.99668e-05	163.624	138.511	140.333	12.8514	2	7.12407
Glyma.18G030900.Wm82.a2.v1	82.756	-5.14291	3.02923e-06	6.00621e-05	175.638	146.206	154.333	9.1796	2.5	0
Glyma.06G050300.Wm82.a2.v1	10529.3	2.98221	3.04228e-06	6.02873e-05	2411.45	2319.8	2227.33	12409	5354.5	24977
Glyma.11G181900.Wm82.a2.v1	2957.21	2.71532	3.05045e-06	6.04159e-05	779.789	783.356	738	4106.95	1495.5	6158.75
Glyma.13G036300.Wm82.a2.v1	50.9193	9.99676	3.06777e-06	6.07252e-05	0	0	0	200.115	33.5	3.56203
Glyma.03G061200.Wm82.a2.v1	40.5145	-7.92847	3.07824e-06	6.08987e-05	78.9515	83.1065	74.3333	0	0	0
Glyma.U013600.Wm82.a2.v1	1346.78	2.75972	3.08217e-06	6.09427e-05	362.719	330.374	273	2834.66	567	1859.38
Glyma.13G035100.Wm82.a2.v1	6248.17	3.41536	3.11232e-06	6.15049e-05	1072.71	1069.1	998.333	5731.74	3236.5	17119.1
Glyma.04G236300.Wm82.a2.v1	1851.81	2.67776	3.12119e-06	6.1646e-05	519.478	481.71	478	2671.26	903	3734.79
Glyma.20G205900.Wm82.a2.v1	81.5875	-5.1219	3.13671e-06	6.19184e-05	160.191	156.979	142.667	9.1796	0.5	0
Glyma.17G114700.Wm82.a2.v1	6847.91	3.81611	3.14574e-06	6.20625e-05	941.124	874.671	934.333	20740.4	3739	4835.46
Glyma.10G252700.Wm82.a2.v1	41.0476	-7.94749	3.16013e-06	6.2312e-05	69.7977	94.3926	82.6667	0	0	0
Glyma.05G157600.Wm82.a2.v1	61.7388	-6.06669	3.16548e-06	6.23661e-05	125.293	117.991	114	3.67184	0.5	0
Glyma.07G055000.Wm82.a2.v1	110.346	5.8084	3.16637e-06	6.23661e-05	5.72112	2.05201	4.33333	27.5388	54	406.072
Glyma.07G031100.Wm82.a2.v1	97.2378	-3.63333	3.19904e-06	6.2965e-05	171.634	188.272	174.667	18.3592	6.5	10.6861
Glyma.16G210400.Wm82.a2.v1	551.24	3.13431	3.2003e-06	6.2965e-05	101.264	124.147	118	1338.39	326	641.166
Glyma.17G236700.Wm82.a2.v1	2071.89	2.68625	3.22253e-06	6.33675e-05	538.358	576.103	594.333	2950.32	1042.5	4222.79
Glyma.17G239200.Wm82.a2.v1	51.3547	4.51066	3.24201e-06	6.37155e-05	4.00479	4.61703	4.33333	148.709	25.5	48.0874
Glyma.04G007300.Wm82.a2.v1	15545.7	5.11784	3.27956e-06	6.44182e-05	894.211	846.455	845	3440.51	8699.5	57001.4
Glyma.20G169700.Wm82.a2.v1	275.099	3.2203	3.28602e-06	6.45095e-05	43.4805	63.0994	84	655.423	213.5	338.393
Glyma.15G177600.Wm82.a2.v1	671.764	2.60128	3.28953e-06	6.45431e-05	193.946	186.22	181	1147.45	343	1159.44
Glyma.18G040900.Wm82.a2.v1	181.43	3.07156	3.29546e-06	6.46239e-05	36.6152	40.5273	31	247.849	88.5	400.729
Glyma.07G208700.Wm82.a2.v1	39426.4	3.39905	3.30227e-06	6.4722e-05	6892.81	6762.41	6525	36149.2	20459.5	107901
Glyma.11G207500.Wm82.a2.v1	210.629	-4.4639	3.32718e-06	6.51745e-05	411.921	393.987	390.333	33.0465	7	3.56203
Glyma.16G173700.Wm82.a2.v1	671.62	-3.6013	3.34023e-06	6.53942e-05	1188.28	1293.79	1177	45.898	26	158.51
Glyma.01G234900.Wm82.a2.v1	84.1707	-7.53136	3.38097e-06	6.61557e-05	177.355	157.492	157.667	1.83592	0	0
Glyma.03G161300.Wm82.a2.v1	232.598	2.87876	3.39549e-06	6.63671e-05	60.0718	51.3003	50	468.159	127.5	350.86
Glyma.16G059900.Wm82.a2.v1	137.143	-3.35072	3.39468e-06	6.63671e-05	247.152	252.398	235	31.2106	6.5	17.8102
Glyma.01G050900.Wm82.a2.v1	202.533	3.70825	3.40081e-06	6.64096e-05	25.745	31.8062	28	569.135	111.5	183.445
Glyma.02G250200.Wm82.a2.v1	129.338	-4.06675	3.40138e-06	6.64096e-05	260.883	227.26	225.667	23.8669	5.5	5.34305
Glyma.13G273300.Wm82.a2.v1	84.1383	-3.73853	3.42156e-06	6.67671e-05	160.764	152.362	157.333	9.1796	1.5	14.2481
Glyma.03G203000.Wm82.a2.v1	163.675	-3.13873	3.46598e-06	6.75602e-05	283.768	304.211	268.667	27.5388	10.5	39.1824
Glyma.13G326600.Wm82.a2.v1	288.069	3.32322	3.46591e-06	6.75602e-05	49.7738	54.8914	50.6667	310.27	145.5	737.341
Glyma.07G004200.Wm82.a2.v1	83.5257	-7.52306	3.46979e-06	6.75975e-05	172.778	159.544	164.333	0	0	1.78102
Glyma.05G186000.Wm82.a2.v1	888.83	3.66082	3.4906e-06	6.79659e-05	128.153	132.355	124	712.337	511.5	2582.47
Glyma.05G047700.Wm82.a2.v1	4555.25	2.51132	3.52429e-06	6.85845e-05	1361.05	1357.92	1250	7863.24	2207.5	7638.78
Glyma.04G228600.Wm82.a2.v1	319.646	2.72478	3.53532e-06	6.87617e-05	81.812	86.1846	82.6667	510.386	168	600.203
Glyma.06G130200.Wm82.a2.v1	70.1591	-5.23055	3.55791e-06	6.91636e-05	132.73	140.563	125.333	7.34368	1.5	0
Glyma.18G032400.Wm82.a2.v1	2961.59	3.61606	3.56374e-06	6.92392e-05	463.411	429.897	479.667	2375.68	1443	8577.37
Glyma.03G046900.Wm82.a2.v1	85.7	3.20321	3.56613e-06	6.92481e-05	17.1634	16.4161	17.6667	156.053	45	153.167
Glyma.16G072600.Wm82.a2.v1	235.694	3.21538	3.56933e-06	6.92725e-05	53.2064	38.4752	50	290.075	157	561.02
Glyma.16G008700.Wm82.a2.v1	238.293	-2.93121	3.57916e-06	6.94256e-05	439.954	402.708	382.333	62.4213	13	48.0874
Glyma.12G062100.Wm82.a2.v1	93.1441	-5.0465	3.59425e-06	6.96805e-05	187.653	173.908	168.333	11.0155	2.5	0
Glyma.10G250400.Wm82.a2.v1	57.3309	-4.93599	3.63402e-06	7.04133e-05	113.278	108.757	102	5.50776	1	1.78102
Glyma.01G068000.Wm82.a2.v1	1302.65	2.67775	3.63745e-06	7.04206e-05	366.724	337.556	344.333	2632.71	729	1873.63
Glyma.07G074100.Wm82.a2.v1	4488.89	3.42308	3.6403e-06	7.04206e-05	778.645	752.576	698	12381.4	2142	4042.91
Glyma.15G256000.Wm82.a2.v1	370.806	2.69281	3.63864e-06	7.04206e-05	105.841	92.8536	85.6667	609.525	190	675.005
Glyma.06G142900.Wm82.a2.v1	927.052	-3.02701	3.69079e-06	7.13586e-05	1724.92	1578	1617.33	271.716	56	133.576
Glyma.05G242500.Wm82.a2.v1	57.697	-4.61418	3.6956e-06	7.14129e-05	120.144	101.575	126	5.50776	1	3.56203
Glyma.04G066800.Wm82.a2.v1	773.088	2.62449	3.69847e-06	7.14298e-05	219.119	212.383	213.333	1191.51	375.5	1469.34
Glyma.19G246900.Wm82.a2.v1	67.2368	-4.3345	3.7049e-06	7.15154e-05	136.163	120.043	109	9.1796	1.5	3.56203
Glyma.10G072100.Wm82.a2.v1	594.51	2.6414	3.71189e-06	7.16116e-05	170.489	158.005	152	1118.07	280	931.472
Glyma.03G220100.Wm82.a2.v1	4714.61	3.59345	3.72396e-06	7.18058e-05	756.904	685.885	663	13607.8	2453	3807.81
Glyma.11G060000.Wm82.a2.v1	539.918	4.69691	3.73033e-06	7.18898e-05	36.0431	44.1183	32.3333	1881.82	300.5	197.693
Glyma.13G361200.Wm82.a2.v1	398.277	5.64121	3.73628e-06	7.19569e-05	14.8749	16.4161	15.3333	55.0776	221.5	1506.74
Glyma.16G125100.Wm82.a2.v1	137.433	-4.0663	3.73784e-06	7.19569e-05	258.595	260.093	248.667	25.7029	5	5.34305
Glyma.13G110800.Wm82.a2.v1	100.055	-3.99384	3.74903e-06	7.21335e-05	193.374	183.142	167.667	18.3592	4.5	5.34305
Glyma.09G238200.Wm82.a2.v1	78.1849	-5.08126	3.76154e-06	7.23354e-05	145.316	158.518	150.667	0	0.5	8.90508
Glyma.13G276600.Wm82.a2.v1	157.143	-3.11144	3.76423e-06	7.23481e-05	268.893	294.464	270	36.7184	11	28.4963
Glyma.17G242200.Wm82.a2.v1	63.6627	-4.25534	3.77278e-06	7.24734e-05	107.557	134.407	116.667	7.34368	2	5.34305
Glyma.19G000700.Wm82.a2.v1	25020.4	2.75245	3.7772e-06	7.24804e-05	6524.37	6408.44	6030.33	32934.6	12357	54214.1
Glyma.19G228600.Wm82.a2.v1	1001.37	5.95727	3.777e-06	7.24804e-05	33.1825	30.2672	27.3333	80.7804	544	3861.24
Glyma.09G015700.Wm82.a2.v1	222.226	-3.69457	3.79014e-06	7.26897e-05	403.911	421.176	394.667	49.5698	6.5	14.2481
Glyma.20G162100.Wm82.a2.v1	91.961	-3.54814	3.81424e-06	7.31127e-05	166.485	172.369	166	16.5233	3.5	12.4671
Glyma.06G265000.Wm82.a2.v1	124.788	-3.2683	3.83289e-06	7.33522e-05	216.258	235.982	208.667	20.1951	7.5	26.7152
Glyma.14G023700.Wm82.a2.v1	757.664	2.87364	3.83184e-06	7.33522e-05	180.215	183.655	183	973.037	379	1693.75
Glyma.20G193200.Wm82.a2.v1	38.9755	-7.87255	3.8307e-06	7.33522e-05	78.9515	76.9505	71	0	0	0
Glyma.04G238600.Wm82.a2.v1	156.511	2.91528	3.85498e-06	7.37355e-05	33.7546	39.5013	39.3333	260.701	79	292.087
Glyma.18G281200.Wm82.a2.v1	95.4764	-3.51674	3.86956e-06	7.39747e-05	172.206	179.038	156	12.8514	5.5	17.8102
Glyma.19G207100.Wm82.a2.v1	331.325	3.87059	3.90164e-06	7.45483e-05	51.4901	33.3452	40.6667	982.217	181.5	258.247
Glyma.08G291000.Wm82.a2.v1	255.277	-2.86669	3.90533e-06	7.45789e-05	443.959	454.008	453	67.929	19	55.2115
Glyma.15G079100.Wm82.a2.v1	5321.59	3.55204	3.91751e-06	7.47715e-05	822.697	849.533	800.667	15240	2813.5	4374.18
Glyma.17G092600.Wm82.a2.v1	133.279	3.06291	3.9208e-06	7.47944e-05	30.3219	26.6762	26	198.279	71	277.839
Glyma.06G024100.Wm82.a2.v1	61.3132	-5.47418	3.92893e-06	7.49095e-05	122.432	117.478	116.333	0	0.5	5.34305
Glyma.01G155300.Wm82.a2.v1	87.9325	-3.80924	3.96505e-06	7.55176e-05	164.196	164.161	152	7.34368	3.5	16.0291
Glyma.07G079600.Wm82.a2.v1	93.8224	4.18317	3.96495e-06	7.55176e-05	10.8701	8.72106	9.66667	280.896	51	74.8027
Glyma.14G054800.Wm82.a2.v1	3090.87	2.64194	3.97911e-06	7.5745e-05	883.913	823.37	784	4419.06	1534	6237.12
Glyma.11G034000.Wm82.a2.v1	12982.2	2.56585	3.99193e-06	7.59487e-05	3786.81	3716.2	3440.67	25071.3	6339.5	19354.3
Glyma.19G036400.Wm82.a2.v1	473.889	4.21226	4.00267e-06	7.61125e-05	50.3459	46.6833	47	1538.5	261	260.028
Glyma.05G235200.Wm82.a2.v1	273.53	2.89958	4.00756e-06	7.61245e-05	59.4997	69.7684	77.6667	580.15	135.5	384.7
Glyma.05G235400.Wm82.a2.v1	77.8278	-3.73844	4.00617e-06	7.61245e-05	136.735	152.875	128.333	11.0155	4	10.6861
Glyma.08G263700.Wm82.a2.v1	376.002	3.0198	4.04236e-06	7.67446e-05	83.5284	81.5675	76.3333	462.652	201.5	876.26
Glyma.06G308600.Wm82.a2.v1	286.063	-2.78851	4.04983e-06	7.6805e-05	498.882	500.691	491.333	73.4368	19	71.2407
Glyma.08G086300.Wm82.a2.v1	1681.32	3.06681	4.04801e-06	7.6805e-05	351.277	365.771	325.333	1874.47	956	4133.74
Glyma.05G231900.Wm82.a2.v1	97.9161	-3.46192	4.05422e-06	7.68474e-05	173.35	185.707	172	18.3592	5	14.2481
Glyma.02G196300.Wm82.a2.v1	50.9983	5.31886	4.07547e-06	7.71684e-05	4.00479	1.02601	1.66667	161.561	21	37.4013
Glyma.10G025700.Wm82.a2.v1	232.216	2.76418	4.07488e-06	7.71684e-05	56.067	63.0994	68.6667	394.723	126.5	414.977
Glyma.12G057200.Wm82.a2.v1	82.7328	-3.71245	4.13319e-06	7.822e-05	151.038	156.466	118.333	9.1796	1.5	14.2481
Glyma.12G192000.Wm82.a2.v1	136.171	-4.0522	4.14056e-06	7.8318e-05	249.441	264.197	255.667	25.7029	4.5	5.34305
Glyma.04G049300.Wm82.a2.v1	38.4182	-7.85178	4.15504e-06	7.85503e-05	77.2351	76.4375	71.3333	0	0	0
Glyma.15G264200.Wm82.a2.v1	58.4086	5.01092	4.17425e-06	7.88717e-05	3.43267	3.59102	5.33333	192.772	51.5	33.8393
Glyma.18G042300.Wm82.a2.v1	64.5512	-4.07454	4.21795e-06	7.96553e-05	124.72	119.017	125.667	7.34368	4	7.12407
Glyma.03G249400.Wm82.a2.v1	53.0899	-5.25589	4.25188e-06	8.02319e-05	106.413	100.549	104	1.83592	1.5	3.56203
Glyma.11G044600.Wm82.a2.v1	101.259	-3.5127	4.25297e-06	8.02319e-05	197.951	174.421	175	20.1951	6	12.4671
Glyma.20G228500.Wm82.a2.v1	158.286	-3.25918	4.27153e-06	8.05395e-05	299.787	273.431	281.333	38.5543	8.5	21.3722
Glyma.08G026000.Wm82.a2.v1	5827.64	2.53877	4.28443e-06	8.07403e-05	1750.66	1671.88	1816.67	8913.39	3028.5	10974.6
Glyma.15G258800.Wm82.a2.v1	665.735	3.88126	4.29052e-06	8.08123e-05	93.8264	75.4115	84	2034.2	359.5	459.502
Glyma.04G023100.Wm82.a2.v1	2895.55	2.50813	4.30921e-06	8.11217e-05	905.654	825.935	746.333	4817.45	1347.5	5033.15
Glyma.03G116300.Wm82.a2.v1	65.7363	-4.31068	4.33097e-06	8.14026e-05	114.422	135.946	127	3.67184	2	8.90508
Glyma.05G245500.Wm82.a2.v1	3794.97	2.62221	4.33039e-06	8.14026e-05	1054.97	1066.02	998.333	7639.26	1944.5	5419.63
Glyma.18G004300.Wm82.a2.v1	184.602	3.02966	4.32779e-06	8.14026e-05	45.1969	35.3972	37.3333	258.865	109	398.948
Glyma.08G205200.Wm82.a2.v1	1583.24	2.58264	4.35025e-06	8.1722e-05	466.844	439.131	442.333	2390.37	798.5	3036.63
Glyma.15G251900.Wm82.a2.v1	214.03	2.7681	4.35919e-06	8.1847e-05	52.6343	56.9434	47	367.184	104	379.356
Glyma.18G152900.Wm82.a2.v1	52.057	3.86849	4.371e-06	8.19826e-05	4.5769	8.72106	6.33333	86.2882	27	108.642
Glyma.19G033500.Wm82.a2.v1	1446.98	3.85219	4.36937e-06	8.19826e-05	181.932	192.889	174.333	973.037	827	4440.07
Glyma.12G222900.Wm82.a2.v1	76.3315	-4.52221	4.38157e-06	8.21378e-05	140.167	152.362	116	11.0155	2.5	1.78102
Glyma.07G052000.Wm82.a2.v1	38.4382	-7.85269	4.39161e-06	8.22421e-05	68.0813	85.6715	73	0	0	0
Glyma.11G091000.Wm82.a2.v1	137.407	-3.14002	4.39258e-06	8.22421e-05	254.59	239.06	234	25.7029	6	30.2773
Glyma.18G275500.Wm82.a2.v1	56.1276	-4.90441	4.39403e-06	8.22421e-05	106.413	110.809	99.3333	5.50776	1	1.78102
Glyma.02G092500.Wm82.a2.v1	2310.97	3.59921	4.40152e-06	8.23391e-05	344.984	359.615	323.667	6706.61	1180	1832.67
Glyma.18G272500.Wm82.a2.v1	77.1936	-3.85639	4.41263e-06	8.25037e-05	148.749	140.05	136.667	12.8514	1	7.12407
Glyma.03G045600.Wm82.a2.v1	858.977	-3.76534	4.45091e-06	8.3176e-05	1636.81	1563.63	1550	190.936	30.5	44.5254
Glyma.07G142600.Wm82.a2.v1	259.295	-3.68775	4.45352e-06	8.31813e-05	481.718	480.684	460.333	58.7494	7.5	16.0291
Glyma.14G056800.Wm82.a2.v1	2695.98	2.98463	4.46557e-06	8.33628e-05	600.146	609.448	572.667	6477.12	1365.5	3097.19
Glyma.12G160700.Wm82.a2.v1	675.463	3.50175	4.47192e-06	8.34377e-05	115.567	103.627	106.333	593.002	371	1889.66
Glyma.15G174700.Wm82.a2.v1	102.24	3.96658	4.48937e-06	8.37196e-05	9.15379	15.3901	31	288.239	116	96.1749
Glyma.01G118000.Wm82.a2.v1	1356.55	3.05737	4.51879e-06	8.41804e-05	294.638	287.282	278.667	3332.19	672.5	1512.08
Glyma.03G199800.Wm82.a2.v1	53.6409	-5.26619	4.51677e-06	8.41804e-05	117.283	91.8276	108	3.67184	1.5	1.78102
Glyma.19G218800.Wm82.a2.v1	622.366	4.00617	4.53132e-06	8.43698e-05	70.9419	74.8985	77.6667	1958.93	348	384.7
Glyma.06G076600.Wm82.a2.v1	1001.73	2.56107	4.55795e-06	8.47848e-05	266.604	313.958	258.667	1716.58	505	1709.78
Glyma.20G023400.Wm82.a2.v1	78.8433	-4.19235	4.55835e-06	8.47848e-05	152.754	146.206	163.333	12.8514	2.5	3.56203
Glyma.06G292100.Wm82.a2.v1	455.276	3.76787	4.56339e-06	8.48176e-05	53.2064	71.3075	61.3333	1345.73	243.5	350.86
Glyma.17G111700.Wm82.a2.v1	52.5869	-5.24185	4.56486e-06	8.48176e-05	101.836	103.114	107	1.83592	1	3.56203
Glyma.03G155300.Wm82.a2.v1	1105.81	3.30609	4.5888e-06	8.52182e-05	201.956	204.175	211.667	2948.49	666.5	1068.61
Glyma.16G024600.Wm82.a2.v1	380.817	4.49073	4.60125e-06	8.5405e-05	26.8893	37.9622	28.3333	170.74	206	1287.67
Glyma.10G199000.Wm82.a2.v1	198408	8.16747	4.62437e-06	8.57897e-05	1435.43	1315.34	1239	174.412	108414	790707
Glyma.08G043800.Wm82.a2.v1	196.603	-2.94682	4.62754e-06	8.58039e-05	357.57	338.582	328	40.3902	11.5	49.8685
Glyma.11G184500.Wm82.a2.v1	37.6882	-7.82414	4.64128e-06	8.6014e-05	73.8025	76.9505	83	0	0	0
Glyma.01G180200.Wm82.a2.v1	37.6339	-7.822	4.6779e-06	8.66479e-05	76.663	73.8725	62	0	0	0
Glyma.06G194300.Wm82.a2.v1	66.2568	5.85147	4.68461e-06	8.67271e-05	4.5769	0	2	192.772	35.5	67.6786
Glyma.17G041200.Wm82.a2.v1	76.3219	4.71213	4.70736e-06	8.71032e-05	4.00479	7.18205	6.33333	246.013	43.5	48.0874
Glyma.04G082000.Wm82.a2.v1	155.673	-3.10174	4.71998e-06	8.72915e-05	264.316	293.438	255.333	27.5388	8.5	37.4013
Glyma.04G191100.Wm82.a2.v1	60.7184	-5.44401	4.72369e-06	8.7315e-05	112.706	124.66	117	5.50776	0.5	0
Glyma.11G210100.Wm82.a2.v1	692.086	2.58932	4.7274e-06	8.73384e-05	183.076	211.357	194.333	1125.42	320.5	1248.49
Glyma.14G055300.Wm82.a2.v1	162.23	2.88755	4.73318e-06	8.74e-05	42.9084	34.3712	33.6667	295.583	77.5	276.058
Glyma.02G071000.Wm82.a2.v1	72.914	5.22612	4.76731e-06	8.79393e-05	4.00479	3.59102	3.66667	29.3747	38	254.685
Glyma.19G081700.Wm82.a2.v1	190.427	3.94704	4.76704e-06	8.79393e-05	21.7403	24.6242	20	574.643	99	140.7
Glyma.10G016500.Wm82.a2.v1	15199.9	2.82397	4.77338e-06	8.8006e-05	3818.28	3705.42	3533.33	34440	7537.5	18836
Glyma.02G123500.Wm82.a2.v1	310.242	3.70455	4.7823e-06	8.8125e-05	46.3411	42.0663	40.6667	901.436	158.5	251.123
Glyma.07G234500.Wm82.a2.v1	57.8515	-4.3454	4.78522e-06	8.81334e-05	113.85	106.705	121	5.50776	3	5.34305
Glyma.01G237900.Wm82.a2.v1	505.633	2.59956	4.81573e-06	8.86496e-05	140.74	145.693	134.333	820.656	273.5	915.442
Glyma.16G015000.Wm82.a2.v1	133.058	-3.62154	4.83215e-06	8.89061e-05	255.162	237.008	232	29.3747	7.5	10.6861
Glyma.16G200600.Wm82.a2.v1	3672.5	2.62971	4.83596e-06	8.89304e-05	1038.96	1004.46	1042.33	5168.11	1896.5	7478.49
Glyma.20G068000.Wm82.a2.v1	1073.33	-2.58847	4.85633e-06	8.9259e-05	1866.23	1815.01	1749.67	337.809	93	274.277
Glyma.17G113000.Wm82.a2.v1	77.992	-7.42369	4.87143e-06	8.94906e-05	152.182	158.005	147.667	0	0.5	1.78102
Glyma.06G221100.Wm82.a2.v1	3803.92	2.89686	4.88692e-06	8.97291e-05	893.067	908.016	875.667	8873	1892.5	4541.59
Glyma.06G204400.Wm82.a2.v1	52.3795	-5.23591	4.89022e-06	8.97437e-05	108.701	95.4186	91	1.83592	0.5	3.56203
Glyma.13G108800.Wm82.a2.v1	371.218	2.9865	4.89346e-06	8.9757e-05	90.9658	75.4115	87	851.867	189.5	466.626
Glyma.03G023400.Wm82.a2.v1	430.955	2.72317	4.90622e-06	8.9885e-05	118.999	107.731	92.3333	868.39	192	628.699
Glyma.09G037600.Wm82.a2.v1	320.173	3.33102	4.90363e-06	8.9885e-05	57.7833	57.9694	56.6667	839.015	168.5	325.926
Glyma.20G103600.Wm82.a2.v1	39.6448	4.70441	4.90798e-06	8.9885e-05	1.71634	4.10403	2.33333	45.898	15	106.861
Glyma.09G281800.Wm82.a2.v1	1834.08	3.14723	4.92416e-06	9.01352e-05	349.561	394.5	340.667	4668.74	930	1923.5
Glyma.08G354400.Wm82.a2.v1	1037.39	2.77062	4.92827e-06	9.01641e-05	277.474	252.911	260	1375.1	521.5	2244.08
Glyma.08G239500.Wm82.a2.v1	1489.15	2.5861	4.9427e-06	9.03819e-05	430.228	420.15	410	2204.94	850.5	2901.28
Glyma.12G033700.Wm82.a2.v1	402.969	2.66731	4.95653e-06	9.05572e-05	105.841	113.374	116.333	771.086	210.5	621.575
Glyma.16G106800.Wm82.a2.v1	64.8927	-4.08572	4.95735e-06	9.05572e-05	123.576	121.582	127	5.50776	1	8.90508
Glyma.19G023200.Wm82.a2.v1	77.8283	4.41891	4.96606e-06	9.06699e-05	5.14901	8.72106	6.33333	238.669	44.5	58.7735
Glyma.02G092600.Wm82.a2.v1	59.9958	-4.39674	4.98689e-06	9.09779e-05	121.86	107.218	103.333	7.34368	2.5	3.56203
Glyma.04G061300.Wm82.a2.v1	240.451	3.1608	4.98802e-06	9.09779e-05	47.4853	49.2483	51.3333	280.896	68	584.173
Glyma.04G147600.Wm82.a2.v1	1255.23	4.35609	4.99735e-06	9.11016e-05	102.408	131.329	123.333	4222.61	713.5	564.582
Glyma.09G014700.Wm82.a2.v1	428.967	4.02566	5.00556e-06	9.11709e-05	52.0622	47.1963	56.3333	1351.24	206.5	265.371
Glyma.19G151300.Wm82.a2.v1	269.102	-3.86139	5.00625e-06	9.11709e-05	526.343	480.684	456	56.9135	11.5	12.4671
Glyma.17G115900.Wm82.a2.v1	1567.87	4.50521	5.05483e-06	9.20087e-05	132.158	132.355	124.333	5406.78	816	600.203
Glyma.05G050800.Wm82.a2.v1	294.864	-2.75954	5.06988e-06	9.22357e-05	508.036	519.672	480	71.6008	22.5	80.1457
Glyma.06G190200.Wm82.a2.v1	136.687	-3.73451	5.09764e-06	9.26935e-05	254.018	254.45	242	29.3747	5	8.90508
Glyma.01G224900.Wm82.a2.v1	1022.18	3.59958	5.10406e-06	9.27631e-05	160.764	150.823	148.333	2965.01	551	812.143
Glyma.14G205800.Wm82.a2.v1	90.4444	3.21028	5.11965e-06	9.29991e-05	18.8797	16.4161	14	137.694	61	188.788
Glyma.03G022100.Wm82.a2.v1	1376.97	2.53064	5.14741e-06	9.3388e-05	397.046	415.533	387.333	2162.71	686	2532.61
Glyma.13G221700.Wm82.a2.v1	152.678	2.85709	5.14618e-06	9.3388e-05	36.6152	37.4492	34.3333	257.029	73	279.62
Glyma.05G117700.Wm82.a2.v1	81.4153	3.81185	5.14889e-06	9.3388e-05	10.8701	10.7731	0	220.31	0	83.7078
Glyma.15G021600.Wm82.a2.v1	58.4249	-5.98585	5.16037e-06	9.35487e-05	101.264	128.764	0	3.67184	0	0
Glyma.02G189600.Wm82.a2.v1	71.2822	-3.88721	5.17337e-06	9.36894e-05	122.432	144.667	128.333	7.34368	4.5	10.6861
Glyma.09G269500.Wm82.a2.v1	73.0131	-3.77546	5.17078e-06	9.36894e-05	141.884	130.303	109.333	9.1796	1.5	10.6861
Glyma.13G126200.Wm82.a2.v1	251.932	-2.94215	5.18354e-06	9.3826e-05	417.642	474.015	485.333	69.7649	25	46.3064
Glyma.06G046300.Wm82.a2.v1	6813.6	3.14862	5.20509e-06	9.41683e-05	1374.21	1387.67	1302.67	6967.31	3473	17525.2
Glyma.17G202700.Wm82.a2.v1	138344	2.78895	5.22755e-06	9.45269e-05	34304.4	35643.5	33149	173278	72971	310150
Glyma.10G150400.Wm82.a2.v1	123.159	-3.9918	5.24251e-06	9.47063e-05	235.138	228.286	217	23.8669	2.5	5.34305
Glyma.19G211600.Wm82.a2.v1	1304.55	2.78797	5.24277e-06	9.47063e-05	330.109	329.861	301.333	2878.72	652.5	1679.5
Glyma.01G061800.Wm82.a2.v1	2409.11	4.51564	5.34828e-06	9.65634e-05	207.677	195.967	196	894.093	1344.5	8338.72
Glyma.03G042600.Wm82.a2.v1	1471.67	3.52903	5.38104e-06	9.71059e-05	232.278	237.008	234.667	4213.43	758	1203.97
Glyma.08G046400.Wm82.a2.v1	60.1179	-4.67168	5.38892e-06	9.7199e-05	118.999	112.348	103.667	7.34368	0	1.78102
Glyma.02G032800.Wm82.a2.v1	195.531	-3.3027	5.39682e-06	9.72924e-05	339.835	370.388	339.333	22.031	12	49.8685
Glyma.07G139600.Wm82.a2.v1	51.2678	5.57496	5.46451e-06	9.84631e-05	0.572112	3.59102	0.666667	167.069	23	33.8393
Glyma.03G040100.Wm82.a2.v1	24.4657	5.87671	5.50517e-06	9.90958e-05	1.14422	0.513003	0.333333	60.5853	16.5	35.6203
Glyma.13G166800.Wm82.a2.v1	2582.82	3.69413	5.50242e-06	9.90958e-05	369.012	371.927	352.667	7727.38	1409	1862.94
Glyma.07G065400.Wm82.a2.v1	36.5635	-7.78037	5.51443e-06	9.92126e-05	74.9467	71.3075	65.3333	0	0	0
Glyma.06G194800.Wm82.a2.v1	1152.78	2.66249	5.53725e-06	9.95731e-05	312.945	316.01	292.667	2375.68	575.5	1606.48
Glyma.03G047900.Wm82.a2.v1	300.38	-2.86503	5.55309e-06	9.98076e-05	498.31	558.148	639.333	86.2882	52	58.7735
Glyma.01G223400.Wm82.a2.v1	75.7829	-3.82788	5.55925e-06	9.98681e-05	148.749	134.407	143.333	12.8514	4	7.12407
Glyma.20G188600.Wm82.a2.v1	31.3036	5.2445	5.56597e-06	9.99387e-05	1.14422	2.05201	2	89.96	24	32.0583
Glyma.16G083700.Wm82.a2.v1	40.7863	8.21916	5.57034e-06	9.99669e-05	0.572112	0	2	135.858	19	26.7152
Glyma.03G247200.Wm82.a2.v1	1367.88	2.73986	5.5783e-06	0.000100059	386.176	326.27	335	2924.62	669	1834.45
Glyma.09G023400.Wm82.a2.v1	1883.57	4.77332	5.60181e-06	0.000100431	139.595	126.199	117.667	541.596	1101	6726.9
Glyma.01G242800.Wm82.a2.v1	279.273	-3.31726	5.60901e-06	0.000100509	505.747	509.412	442.667	73.4368	12	28.4963
Glyma.06G156900.Wm82.a2.v1	1172.28	2.81249	5.61477e-06	0.000100562	272.897	311.393	289.667	2607.01	603.5	1497.83
Glyma.12G048100.Wm82.a2.v1	5517.4	3.16405	5.62591e-06	0.000100711	1151.09	1063.97	1012.33	14285.3	2755	5569.24
Glyma.04G247600.Wm82.a2.v1	56.8798	-4.31976	5.63464e-06	0.000100775	110.99	105.679	105.333	5.50776	1	5.34305
[truncated: 42,348 more rows]
