# Supplementary material for: Dynamic Changes in Genome-Wide Histone3 Lysine27 Trimethylation and Gene Expression of Soybean Roots in Response to Salt Stress
Source: Front Plant Sci. 2019 Sep 10;10:1031. doi: 10.3389/fpls.2019.01031 (PMC6746917; doi:10.3389/fpls.2019.01031)
Supplement: Supplementary file 2 [file Table_2.xlsx]

## Sheet: Sheet1
Supplementary Table 5. The list of genes with H3K27me3 modification in control soybean plants
Symbol	Aliases
LOC100779643	GLYMA.01G000700
LOC100792431	GLYMA.01G001100
LOC100790501	GLYMA.01G003600
LOC100776823	GLYMA.01G019100
LOC100794539	GLYMA.01G024800
LOC102669053	GLYMA.01G024900
LOC100789973	GLYMA.01G028200
LOC100789448	GLYMA.01G036200
LOC100797911	GLYMA.01G043300
LOC100790671	GLYMA.01G055400
LOC100813520	GLYMA.01G064100
LOC100819745	GLYMA.01G0642001
LOC100818153	GLYMA.01G066500
LOC100797542	GLYMA.01G070300
LOC100797182	GLYMA.01G073400
LOC100803385	GLYMA.01G074700
LOC100806582	GLYMA.01G075800
LOC100810309	GLYMA.01G076100
LOC100798775	GLYMA.01G076900
LOC100799827	GLYMA.01G077300
LOC100803551	GLYMA.01G079100
LOC100786254	GLYMA.01G086200
LOC100789451	GLYMA.01G0866001
LOC100799488	GLYMA.01G088200
LOC100785020	GLYMA.01G091000
LOC100789619	GLYMA.01G093200
LOC100790154	GLYMA.01G093900
LOC100776977	GLYMA.01G097200
LOC100791745	GLYMA.01G097500
LOC100788728	GLYMA.01G099100
LOC100800706	GLYMA.01G100900
LOC100805512	GLYMA.01G104200
LOC100811740	GLYMA.01G107500
LOC100791201	GLYMA.01G108100
LOC100814779	GLYMA.01G108200
LOC100799632	GLYMA.01G110300
LOC100783050	GLYMA.01G115100
LOC100796110	GLYMA.01G125300
LOC100797163	GLYMA.01G125400
LOC100818684	GLYMA.01G132800
LOC100793846	GLYMA.01G134100
LOC100798955	GLYMA.01G144200
LOC100793472	GLYMA.01G144500
LOC100782161	GLYMA.01G156800
LOC100801787	GLYMA.01G162100
LOC100800903	GLYMA.01G175100
LOC100819211	GLYMA.01G199000
LOC100777350	GLYMA.01G220700
LOC100800173	GLYMA.01G230700
LOC100779830	GLYMA.01G245200
LOC100816409	GLYMA.02G001000
LOC100793874	GLYMA.02G011700
LOC100786441	GLYMA.02G017400
LOC100785759	GLYMA.02G020900
LOC100812128	GLYMA.02G041800
LOC100776856	GLYMA.02G046600
LOC100791772	GLYMA.02G053200
LOC100820492	GLYMA.02G065600
LOC100785767	GLYMA.02G070800
LOC102668354	GLYMA.02G088000
LOC100820480	GLYMA.02G089900
LOC100791762	GLYMA.02G095600
LOC100801664	GLYMA.02G098300
LOC100806432	GLYMA.02G101500
LOC100814288	GLYMA.02G118800
LOC100811049	GLYMA.02G121500
LOC100781286	GLYMA.02G127400
LOC100793349	GLYMA.02G129100
LOC100788764	GLYMA.02G145600
LOC102662232	GLYMA.02G148000
LOC100792646	GLYMA.02G150200
LOC100793172	GLYMA.02G150400
LOC100815882	GLYMA.02G156600
LOC100820482	GLYMA.02G157700
LOC102663043	GLYMA.02G158000
LOC100788067	GLYMA.02G159900
LOC100527081	GLYMA.02G161200
LOC100779869	GLYMA.02G162000
LOC100785390	GLYMA.02G162300
LOC100816226	GLYMA.02G1627001
LOC100783798	GLYMA.02G163200
LOC100804313	GLYMA.02G165000
LOC100807496	GLYMA.02G165800
LOC100805368	GLYMA.02G166800
LOC100793149	GLYMA.02G168900
LOC100795433	GLYMA.02G184900
LOC100792278	GLYMA.02G185500
LOC100791934	GLYMA.02G186100
LOC100797552	GLYMA.02G186600
LOC100796669	GLYMA.02G186700
LOC100305810	GLYMA.02G187500
LOC102666059	GLYMA.02G188000
LOC100800388	GLYMA.02G189600
LOC100816728	GLYMA.02G189800
LOC100806239	GLYMA.02G193300
LOC100794208	GLYMA.02G195700
LOC100811762	GLYMA.02G198700
LOC102665548	GLYMA.02G200000
LOC100811041	GLYMA.02G211900
LOC100814266	GLYMA.02G213100
LOC100810520	GLYMA.02G213300
LOC100777373	GLYMA.02G215800
LOC102669374	GLYMA.02G228000
LOC100798458	GLYMA.02G228500
LOC100779316	GLYMA.02G234800
LOC100785752	GLYMA.02G237300
LOC102664145	GLYMA.02G246100
LOC100809260	GLYMA.02G266600
LOC100793165	GLYMA.02G275500
LOC100791760	GLYMA.02G286500
LOC100306089	GLYMA.02G286900
LOC100810854	GLYMA.02G296300
LOC100810332	GLYMA.02G310900
LOC100500123	GLYMA.02G311900
LOC100778827	GLYMA.03G000700
LOC100777946	GLYMA.03G007800
LOC100785431	GLYMA.03G010100
LOC100791073	GLYMA.03G015600
LOC100782234	GLYMA.03G023800
LOC100783654	GLYMA.03G026000
AG1	GLYMA.03G028000
LOC100807870	GLYMA.03G028600
LOC100792852	GLYMA.03G028900
LOC100801312	GLYMA.03G030800
LOC100785609	GLYMA.03G037800
LOC100803619	GLYMA.03G038700
LOC100811432	GLYMA.03G039800
LOC100527088	GLYMA.03G040900
LOC100802561	GLYMA.03G042400
LOC100775617	GLYMA.03G044300
LOC100785797	GLYMA.03G044900
LOC100789158	GLYMA.03G049600
LOC102662733	GLYMA.03G049700
LOC100781480	GLYMA.03G050400
LOC100782052	GLYMA.03G058300
LOC100777609	GLYMA.03G068200
LOC100795829	GLYMA.03G068700
LOC100808410	GLYMA.03G069200
LOC100797953	GLYMA.03G069600
LOC100813053	GLYMA.03G073900
LOC100806992	GLYMA.03G076800
LOC100800588	GLYMA.03G080200
LOC100800058	GLYMA.03G080300
LOC100789670	GLYMA.03G084300
LOC100791088	GLYMA.03G085000
LOC100820496	GLYMA.03G086600
LOC100527316	GLYMA.03G088500
LOC100781303	GLYMA.03G097100
LOC102660900	GLYMA.03G097200
LOC100810730	GLYMA.03G097900
LOC100812337	GLYMA.03G098800
LOC100786119	GLYMA.03G099600
LOC100820166	GLYMA.03G102800
LOC100775974	GLYMA.03G103500
LOC100810533	GLYMA.03G1052001
LOC100777401	GLYMA.03G107500
LOC100796351	GLYMA.03G113800
LOC100809670	GLYMA.03G121300
LOC100795992	GLYMA.03G126700
LOC100797585	GLYMA.03G126900
LOC100797053	GLYMA.03G133400
LOC100804856	GLYMA.03G137100
LOC100500621	GLYMA.03G147700
LOC100797410	GLYMA.03G151000
LOC100793900	GLYMA.03G216100
LOC100798827	GLYMA.03G222800
LOC100781489	GLYMA.03G262200
LOC100780626	GLYMA.04G005100
LOC106798359	GLYMA.04G006500
LOC100797800	GLYMA.04G006700
LOC100787036	GLYMA.04G027300
LOC100793040	GLYMA.04G029500
LOC100808434	GLYMA.04G057700
LOC100790408	GLYMA.04G070600
LOC100793039	GLYMA.04G072400
LOC100527662	GLYMA.04G078000
LOC100803644	GLYMA.04G094400
LOC100807545	GLYMA.04G098900
LOC100818201	GLYMA.04G108100
LOC100794972	GLYMA.04G117400
LOC100796033	GLYMA.04G117900
LOC100783866	GLYMA.04G123500
LOC100809690	GLYMA.04G123900
LOC100794450	GLYMA.04G126000
LOC100798161	GLYMA.04G126900
LOC102660020	GLYMA.04G128100
LOC100777248	GLYMA.04G131800
LOC547474	GLYMA.04G134900
LOC100784029	GLYMA.04G135300
LOC100305983	GLYMA.04G140400
LOC106798516	GLYMA.04G140800
LOC100804342	GLYMA.04G141600
LOC100797066	GLYMA.04G142100
LOC100799341	GLYMA.04G146000
LOC100796190	GLYMA.04G149900
LOC100802776	GLYMA.04G155600
LOC100784212	GLYMA.04G159200
LOC100784742	GLYMA.04G159300
LOC100788995	GLYMA.04G162100
LOC100798329	GLYMA.04G166100
LOC102659620	GLYMA.04G172800
LOC100500565	GLYMA.04G178200
LOC100788458	GLYMA.04G182900
LOC100801159	GLYMA.04G187000
LOC100802765	GLYMA.04G187600
LOC100804884	GLYMA.04G188200
LOC100780098	GLYMA.04G194900
LOC100797073	GLYMA.04G200800
LOC100793939	GLYMA.05G002300
LOC100778001	GLYMA.05G0034001
LOC100806845	GLYMA.05G016000
LOC100783882	GLYMA.05G029600
LOC100814895	GLYMA.05G051500
LOC100806324	GLYMA.05G054300
LOC100780129	GLYMA.05G063100
LOC100792882	GLYMA.05G064600
LOC100793576	GLYMA.05G070700
LOC100776024	GLYMA.05G077900
LOC100794641	GLYMA.05G086700
LOC100791478	GLYMA.05G087600
LOC100778694	GLYMA.05G088900
LOC100820395	GLYMA.05G089200
LOC100819332	GLYMA.05G089300
LOC100806501	GLYMA.05G089400
LOC100527476	GLYMA.05G089900
LOC100811317	GLYMA.05G090100
LOC100787071	GLYMA.05G108500
LOC100787611	GLYMA.05G108600
LOC102661936	GLYMA.05G110000
RLK1	GLYMA.05G110400
LOC100799053	GLYMA.05G115200
LOC102662429	GLYMA.05G115400
LOC100796210	GLYMA.05G117300
LOC100796038	GLYMA.05G132200
LOC100795161	GLYMA.05G146400
LOC102669001	GLYMA.05G152400
LOC100792363	GLYMA.05G177100
LOC100798698	GLYMA.05G247500
LOC100799956	GLYMA.06G097100
LOC100818635	GLYMA.06G106400
LOC100807223	GLYMA.06G106900
LOC100814186	GLYMA.06G109900
LOC100789214	GLYMA.06G145200
LOC100810961	GLYMA.06G152600
LOC100813122	GLYMA.06G153200
LOC100818971	GLYMA.06G155600
LOC100814918	GLYMA.06G156000
LOC100805810	GLYMA.06G165500
LOC100812040	GLYMA.06G174600
LOC100778359	GLYMA.06G180700
LOC100810963	GLYMA.06G183800
LOC100791160	GLYMA.06G186000
LOC100779085	GLYMA.06G196800
LOC102669359	GLYMA.06G197100
LOC100797206	GLYMA.06G199000
LOC100811503	GLYMA.06G202500
LOC102662757	GLYMA.06G204700
LOC100819522	GLYMA.06G206000
LOC102666452	GLYMA.06G207800
LOC100800665	GLYMA.06G210900
LOC100777121	GLYMA.06G214000
LOC100791683	GLYMA.06G215700
LOC100777809	GLYMA.06G216400
LOC100792208	GLYMA.06G216600
LOC100783185	GLYMA.06G217400
LOC100789027	GLYMA.06G217600
LOC100796770	GLYMA.06G218300
LOC100815600	GLYMA.06G220300
LOC100777616	GLYMA.06G222100
LOC100791481	GLYMA.06G223300
LOC100811505	GLYMA.06G223900
LOC100814375	GLYMA.06G224700
LOC100815436	GLYMA.06G225500
LOC100808806	GLYMA.06G225600
LOC100791334	GLYMA.06G238700
LOC100791144	GLYMA.06G243300
LOC102665213	GLYMA.06G245500
LOC100776040	GLYMA.06G250600
LOC100814017	GLYMA.06G253800
LOC100792011	GLYMA.06G258400
LOC100794112	GLYMA.06G258900
LOC100779962	GLYMA.06G260300
LOC100804557	GLYMA.06G261200
LOC100787964	GLYMA.06G268800
LOC100788505	GLYMA.06G269200
LOC100779223	GLYMA.06G278400
LOC100786903	GLYMA.06G285500
LOC100800313	GLYMA.06G289500
LOC100783196	GLYMA.06G301000
LOC100781921	GLYMA.06G301900
LOC100815439	GLYMA.06G313600
LOC100815971	GLYMA.06G316700
LOC100818471	GLYMA.07G001400
LOC100816338	GLYMA.07G025000
LOC102669841	GLYMA.07G035600
LOC100780861	GLYMA.07G046900
BAG6A	GLYMA.07G061500
LOC100794137	GLYMA.07G069700
LOC100782672	GLYMA.07G070700
LOC100798737	GLYMA.07G071600
LOC100809203	GLYMA.07G075900
LOC100807963	GLYMA.07G080900
LOC100820061	GLYMA.07G081300
LOC100792936	GLYMA.07G094100
LOC100808843	GLYMA.07G097900
LOC100817392	GLYMA.07G106900
LOC100775351	GLYMA.07G110300
LOC100814400	GLYMA.07G111700
LOC100807081	GLYMA.07G113100
LOC100783561	GLYMA.07G117600
LOC100795390	GLYMA.07G118800
LOC100776070	GLYMA.07G119300
LOC100808672	GLYMA.07G122500
LOC100500260	GLYMA.07G129900
LOC100820254	GLYMA.07G145900
LOC100776240	GLYMA.07G146800
LOC100810805	GLYMA.07G147200
LOC100784451	GLYMA.07G151500
LOC100780874	GLYMA.07G151600
LOC100791358	GLYMA.07G154100
LOC100795021	GLYMA.07G156000
LOC100804592	GLYMA.07G157400
LOC100798038	GLYMA.07G157900
LOC100801936	GLYMA.07G160700
LOC102666056	GLYMA.07G163800
LOC100816519	GLYMA.07G170200
LOC100804937	GLYMA.07G171200
LOC100805477	GLYMA.07G171400
LOC100776064	GLYMA.07G173100
LOC100815085	GLYMA.07G173800
LOC100305917	GLYMA.07G180400
LOC100778177	GLYMA.07G186000
LOC100803874	GLYMA.07G193500
LOC100795920	GLYMA.07G201800
LOC100792557	GLYMA.07G208400
LOC100817219	GLYMA.07G211300
LOC100305848	GLYMA.07G216900
LOC100785682	GLYMA.07G220800
LOC102665457	GLYMA.07G226800
LOC100810632	GLYMA.07G228700
LOC100776428	GLYMA.07G232500
LOC100776960	GLYMA.07G233200
LOC100816336	GLYMA.07G260400
LOC100127401	GLYMA.07G263600
LOC100800002	GLYMA.08G008700
LOC100817414	GLYMA.08G069400
LOC100792425	GLYMA.08G070700
LOC100796640	GLYMA.08G071700
LOC100777857	GLYMA.08G072400
LOC100816891	GLYMA.08G082400
LOC100811545	GLYMA.08G084400
LOC100811214	GLYMA.08G102300
LOC100776263	GLYMA.08G120600
LOC102664624	GLYMA.08G121000
LOC100787825	GLYMA.08G127000
LOC100809936	GLYMA.08G134000
LOC100800361	GLYMA.08G143200
LOC102661772	GLYMA.08G152000
LOC100820089	GLYMA.08G155000
IDH1	GLYMA.08G160500
LOC100795933	GLYMA.08G165500
LOC100800174	GLYMA.08G166000
LOC102665807	GLYMA.08G166900
LOC102670442	GLYMA.08G168900
LOC100776267	GLYMA.08G191700
LOC100784291	GLYMA.08G194400
LOC100810130	GLYMA.08G204300
LOC100790491	GLYMA.08G205400
LOC102665410	GLYMA.08G217800
LOC100779812	GLYMA.08G226600
LOC100792410	GLYMA.08G229400
LOC100793984	GLYMA.08G229600
LOC102665805	GLYMA.08G229900
LOC100802478	GLYMA.08G232800
LOC100808850	GLYMA.08G234900
LOC100500688	GLYMA.08G236400
LOC100819005	GLYMA.08G237500
LOC100804256	GLYMA.08G238400
LOC100776087	GLYMA.08G246800
LOC100788724	GLYMA.08G251400
LOC100781410	GLYMA.08G253800
LOC100813881	GLYMA.08G262900
LOC100814762	GLYMA.08G263000
LOC100819020	GLYMA.08G264400
LOC100820096	GLYMA.08G264900
LOC100779639	GLYMA.08G267700
LOC100780532	GLYMA.08G267900
LOC100806029	GLYMA.08G269000
LOC102667755	GLYMA.08G270800
LOC100776078	GLYMA.08G273000
LOC100499634	GLYMA.08G274400
LOC100792575	GLYMA.08G275600
LOC100796803	GLYMA.08G276400
LOC100812793	GLYMA.08G278700
LOC100796816	GLYMA.08G279800
LOC100798413	GLYMA.08G281700
LOC100792240	GLYMA.08G283600
LOC100810291	GLYMA.08G286200
LOC100820613	GLYMA.08G290200
LOC100795404	GLYMA.08G295900
LOC100802834	GLYMA.08G297800
LOC100784105	GLYMA.08G308700
LOC100786742	GLYMA.08G309200
LOC106799617	GLYMA.08G313900
LOC102659821	GLYMA.08G316300
LOC100797332	GLYMA.08G316400
LOC100811715	GLYMA.08G323700
LOC100815471	GLYMA.08G324600
LOC100791363	GLYMA.08G332500
LOC100802481	GLYMA.08G335200
LOC100306233	GLYMA.08G342200
LOC100809399	GLYMA.08G342600
LOC100805674	GLYMA.08G344400
LOC100782681	GLYMA.08G354400
LOC100796820	GLYMA.08G358100
LOC100804792	GLYMA.08G361900
LOC100797925	GLYMA.09G007900
LOC100776481	GLYMA.09G015000
LOC100808191	GLYMA.09G0160001
LOC100797541	GLYMA.09G050200
LOC100802519	GLYMA.09G050600
LOC100778778	GLYMA.09G063000
LOC100785738	GLYMA.09G064600
LOC100788218	GLYMA.09G065600
LOC100780565	GLYMA.09G072700
LOC100812461	GLYMA.09G078300
LOC100776112	GLYMA.09G083100
LOC100777179	GLYMA.09G083700
LOC100777704	GLYMA.09G083800
LOC100783981	GLYMA.09G084300
LOC100780911	GLYMA.09G085600
LOC102662082	GLYMA.09G086700
LOC100785028	GLYMA.09G087400
LOC100787681	GLYMA.09G089400
LOC106794477	GLYMA.09G093600
LOC106794559	GLYMA.09G100100
LOC100815318	GLYMA.09G103300
LOC100801270	GLYMA.09G104600
LOC100793126	GLYMA.09G107000
LOC100806594	GLYMA.09G107400
LOC100820469	GLYMA.09G107600
LOC100810849	GLYMA.09G108300
LOC100776127	GLYMA.09G109000
LOC100777194	GLYMA.09G109100
LOC106794379	GLYMA.09G111100
LOC106794494	GLYMA.09G113500
LOC100783072	GLYMA.09G115100
LOC100808902	GLYMA.09G115600
LOC100804631	GLYMA.09G127300
LOC100812294	GLYMA.09G131900
LOC100779839	GLYMA.09G138400
LOC102663245	GLYMA.09G139100
LOC102669426	GLYMA.09G144700
LOC100305378	GLYMA.09G149200
LOC100775570	GLYMA.09G162300
LOC100782533	GLYMA.09G166100
LOC100809075	GLYMA.09G168000
LOC100811037	GLYMA.09G177100
LOC100792605	GLYMA.09G178700
LOC100781992	GLYMA.09G194200
LOC100802694	GLYMA.09G201400
LOC102663989	GLYMA.09G208700
LOC100802864	GLYMA.09G209300
LOC100803028	GLYMA.09G225100
LOC100803928	GLYMA.09G241600
LOC100775574	GLYMA.09G248300
LOC100815316	GLYMA.09G252300
LOC100786425	GLYMA.09G260900
LOC100788032	GLYMA.09G261400
LOC100817104	GLYMA.09G261700
LOC102666485	GLYMA.09G265700
LOC100799126	GLYMA.09G266900
LOC100800714	GLYMA.09G267100
LOC102664796	GLYMA.09G281700
LOC100786791	GLYMA.09G284400
LOC100796311	GLYMA.09G284700
LOC100793713	GLYMA.10G002400
LOC100819794	GLYMA.10G017800
LOC100779173	GLYMA.10G036600
LOC100788959	GLYMA.10G040700
LOC100791595	GLYMA.10G042500
LOC100794588	GLYMA.10G062300
LOC100804135	GLYMA.10G065200
LOC100811614	GLYMA.10G066900
LOC100790208	GLYMA.10G074500
LOC100793363	GLYMA.10G075900
LOC100798119	GLYMA.10G076500
LOC100817485	GLYMA.10G088000
LOC100803056	GLYMA.10G089200
LOC100306374	GLYMA.10G089300
LOC100805725	GLYMA.10G091000
LOC100810338	GLYMA.10G093300
LOC100810862	GLYMA.10G093600
LOC100791262	GLYMA.10G096300
LOC100796678	GLYMA.10G096600
LOC100807846	GLYMA.10G099200
LOC100797756	GLYMA.10G102400
LOC100795626	GLYMA.10G102800
LOC100777940	GLYMA.10G103200
LOC100793515	GLYMA.10G104100
LOC100813948	GLYMA.10G104500
LOC100791060	GLYMA.10G104900
LOC100789475	GLYMA.10G105900
LOC100796167	GLYMA.10G106500
LOC100786814	GLYMA.10G106900
LOC100779161	GLYMA.10G111800
LOC100819254	GLYMA.10G113100
LOC100787876	GLYMA.10G117000
LOC100798991	GLYMA.10G118800
LOC100816216	GLYMA.10G128200
LOC100787698	GLYMA.10G130100
LOC100794394	GLYMA.10G130600
LOC100792990	GLYMA.10G131500
LOC100803049	GLYMA.10G133400
LOC100801285	GLYMA.10G133900
LOC100790707	GLYMA.10G142500
LOC100794385	GLYMA.10G164800
LOC100811400	GLYMA.10G172600
LOC100815153	GLYMA.10G174500
LOC100814462	GLYMA.10G193800
LOC100306353	GLYMA.10G193900
CP3	GLYMA.10G207100
LOC100811603	GLYMA.10G209300
LOC100786996	GLYMA.10G215500
LOC100787891	GLYMA.10G251300
LOC100796158	GLYMA.10G253300
LOC100796870	GLYMA.10G255700
LOC100792837	GLYMA.10G283400
LOC100804117	GLYMA.10G284200
LOC100814818	GLYMA.10G290900
LOC100779024	GLYMA.11G035800
LOC102669922	GLYMA.11G043500
LOC100815193	GLYMA.11G057800
LOC100786835	GLYMA.11G058700
LOC100807530	GLYMA.11G061700
LOC100778846	GLYMA.11G062900
LOC102670331	GLYMA.11G084900
LOC100806806	GLYMA.11G093800
LOC100788096	GLYMA.11G110800
LOC100788273	GLYMA.11G130400
LOC100782605	GLYMA.11G132200
LOC100797430	GLYMA.11G149100
LOC100798497	GLYMA.11G150100
LOC100786658	GLYMA.11G151400
LOC100803810	GLYMA.11G152600
LOC100793030	GLYMA.11G152700
LOC100794075	GLYMA.11G152800
LOC100777057	GLYMA.11G157100
LOC100809339	GLYMA.11G160400
LOC100808947	GLYMA.11G163900
LOC100806121	GLYMA.11G174400
LOC100790744	GLYMA.11G175700
LOC100787020	GLYMA.11G175800
LOC102662752	GLYMA.11G177000
LOC100780797	GLYMA.11G182700
LOC100814653	GLYMA.11G185900
LOC100816242	GLYMA.11G186100
LOC100803274	GLYMA.11G191100
LOC100809312	GLYMA.11G196100
LOC100811978	GLYMA.11G196600
YSL1	GLYMA.11G203400
LOC100775608	GLYMA.11G205200
LOC100802742	GLYMA.11G208500
LOC100790042	GLYMA.11G208600
LOC100787771	GLYMA.11G210400
LOC100785125	GLYMA.11G210800
LOC100776519	GLYMA.11G217300
LOC100794418	GLYMA.11G223900
LOC100777754	GLYMA.11G255700
LOC100781873	GLYMA.11G256800
LOC100809695	GLYMA.12G006300
LOC100781340	GLYMA.12G012400
LOC100775292	GLYMA.12G021300
LOC100500273	GLYMA.12G026000
LOC100803471	GLYMA.12G027600
LOC100804533	GLYMA.12G027700
LOC100170727	GLYMA.12G032300
LOC102664475	GLYMA.12G054800
LOC100500100	GLYMA.12G060500
LOC102663308	GLYMA.12G071700
LOC100794093	GLYMA.12G078000
LOC100788476	GLYMA.12G083200
LOC100789531	GLYMA.12G083700
LOC100808444	GLYMA.12G101000
LOC100819136	GLYMA.12G103400
LOC100819676	GLYMA.12G103500
LOC100778518	GLYMA.12G104500
LOC778184	GLYMA.12G104800
LOC100791306	GLYMA.12G107600
LOC100797256	GLYMA.12G108600
LOC102667948	GLYMA.12G109100
LOC100811474	GLYMA.12G112600
LOC100778521	GLYMA.12G123600
LOC102666369	GLYMA.12G125600
LOC106795362	GLYMA.12G126900
LOC100806134	GLYMA.12G128100
LOC100783341	GLYMA.12G133700
LOC100783879	GLYMA.12G133900
LOC100784221	GLYMA.12G136600
LOC102669181	GLYMA.12G136700
LOC102668647	GLYMA.12G145400
LOC100798525	GLYMA.12G146400
LOC100805602	GLYMA.12G146600
LOC100807208	GLYMA.12G154100
LOC100527881	GLYMA.12G154500
LOC100781183	GLYMA.12G155400
LOC102668158	GLYMA.12G156400
LOC100795147	GLYMA.12G156800
LOC100800275	GLYMA.12G158900
LOC100804717	GLYMA.12G160700
LOC100780443	GLYMA.12G172700
LOC100780273	GLYMA.12G174900
LOC102660002	GLYMA.12G175800
LOC100792694	GLYMA.12G176500
LOC100792502	GLYMA.12G190300
LOC100807714	GLYMA.12G198100
LOC100527311	GLYMA.12G200400
BZIP58	GLYMA.12G208400
LOC100788105	GLYMA.12G212800
LOC100795500	GLYMA.12G216500
LOC100819131	GLYMA.12G233900
LOC100778880	GLYMA.13G000800
LOC100790615	GLYMA.13G004900
LOC100794474	GLYMA.13G007200
LOC100783198	GLYMA.13G007400
LOC100802266	GLYMA.13G010100
GMN56	GLYMA.13G024700
LOC102669626	GLYMA.13G026000
LOC100798882	GLYMA.13G026700
LOC100776209	GLYMA.13G026800
LOC100799939	GLYMA.13G027100
LOC100781560	GLYMA.13G027600
LOC100776207	GLYMA.13G031500
LOC100817554	GLYMA.13G034100
LOC106795446	GLYMA.13G035800
LOC100810074	GLYMA.13G039000
LOC100820577	GLYMA.13G046800
LOC100801549	GLYMA.13G047400
LOC100782635	GLYMA.13G050300
LOC100808822	GLYMA.13G051700
LOC100787971	GLYMA.13G052100
LOC106795475	GLYMA.13G055900
LOC100790440	GLYMA.13G077500
LOC100777822	GLYMA.13G080300
LOC102661012	GLYMA.13G082000
LOC100799246	GLYMA.13G086900
LOC100797668	GLYMA.13G087200
LOC100306346	GLYMA.13G094100
LOC100783524	GLYMA.13G109500
LOC100817557	GLYMA.13G117000
LOC100777469	GLYMA.13G150200
LOC100792529	GLYMA.13G154200
LOC100783888	GLYMA.13G174700
LOC100787607	GLYMA.13G177300
LOC100305828	GLYMA.13G186300
LOC100800124	GLYMA.13G186600
LOC100801193	GLYMA.13G187100
LOC100812761	GLYMA.13G192600
LOC100781565	GLYMA.13G199300
LOC100792722	GLYMA.13G200500
LOC100793257	GLYMA.13G203400
LOC100804205	GLYMA.13G206700
LOC100808994	GLYMA.13G228700
LOC100777465	GLYMA.13G235300
LOC100783891	GLYMA.13G238000
LOC100787958	GLYMA.13G263400
LOC100790959	GLYMA.13G265000
LOC100795358	GLYMA.13G270900
LOC100797120	GLYMA.13G284600
LOC100805270	GLYMA.13G287600
LOC100786176	GLYMA.13G288000
LOC100807403	GLYMA.13G289000
LOC102667828	GLYMA.13G298800
LOC100818961	GLYMA.13G304000
LOC100784779	GLYMA.13G309200
LOC100775499	GLYMA.13G312200
LOC100527616	GLYMA.13G314500
LOC100778156	GLYMA.13G330300
LOC100777476	GLYMA.13G331800
LOC100786023	GLYMA.13G350500
LOC106795655	GLYMA.13G353900
LOC100809888	GLYMA.13G368700
LOC100795551	GLYMA.14G001500
LOC100804747	GLYMA.14G017900
LOC100784805	GLYMA.14G018600
LOC100786041	GLYMA.14G0334001
LOC100783019	GLYMA.14G042400
LOC100808142	GLYMA.14G051400
LOC100793805	GLYMA.14G064600
LOC100784447	GLYMA.14G064700
LOC100798730	GLYMA.14G069800
LOC100796783	GLYMA.14G073800
LOC100795389	GLYMA.14G0877002
LOC100811513	GLYMA.14G092100
LOC100779611	GLYMA.14G097400
LOC100789229	GLYMA.14G097800
LOC100781223	GLYMA.14G098000
LOC100790815	GLYMA.14G098300
LOC100500666	GLYMA.14G100000
LOC100800327	GLYMA.14G100300
LOC102669949	GLYMA.14G109500
LOC100820065	GLYMA.14G114100
LOC100808129	GLYMA.14G117500
LOC100817208	GLYMA.14G118800
LOC100796963	GLYMA.14G119200
LOC100815980	GLYMA.14G124900
LOC100802115	GLYMA.14G125300
LOC100778728	GLYMA.14G129100
LOC100779257	GLYMA.14G129300
LOC100796079	GLYMA.14G132600
LOC100813676	GLYMA.14G134900
LOC100814210	GLYMA.14G135000
LOC100778913	GLYMA.14G137100
LOC100781593	GLYMA.14G137700
LOC100813857	GLYMA.14G140800
LOC100811169	GLYMA.14G145000
LOC100812232	GLYMA.14G145600
LOC100813852	GLYMA.14G148100
LOC100815984	GLYMA.14G148700
LOC100816511	GLYMA.14G148800
LOC102668501	GLYMA.14G149100
LOC100783388	GLYMA.14G151100
LOC100777641	GLYMA.14G151600
LOC100798216	GLYMA.14G154200
LOC100776778	GLYMA.14G157800
LOC106795885	GLYMA.14G157900
LOC100305595	GLYMA.14G162600
LOC100817212	GLYMA.14G164600
LOC100818103	GLYMA.14G164900
LOC100776426	GLYMA.14G167200
LOC100810787	GLYMA.14G167400
LOC100783378	GLYMA.14G172300
LOC100793083	GLYMA.14G173300
LOC100815444	GLYMA.14G178300
LOC100789751	GLYMA.14G183400
LOC100800852	GLYMA.14G187300
LOC100820583	GLYMA.14G194700
LOC100803157	GLYMA.14G199000
LOC102662074	GLYMA.14G204500
LOC102663325	GLYMA.14G205300
LOC102660858	GLYMA.14G213700
LOC100786204	GLYMA.14G217600
LOC100787093	GLYMA.14G220200
LOC102663671	GLYMA.15G000900
LOC100789772	GLYMA.15G001400
LOC100798567	GLYMA.15G006900
LOC100789067	GLYMA.15G019800
LOC100779453	GLYMA.15G057900
LOC100807617	GLYMA.15G059500
LOC100799797	GLYMA.15G061900
LOC100790658	GLYMA.15G105900
LOC100804429	GLYMA.15G112300
LOC100776967	GLYMA.15G118500
LOC100782865	GLYMA.15G135800
LOC100807437	GLYMA.15G136900
LOC100787467	GLYMA.15G137000
LOC100789594	GLYMA.15G137800
LOC100796799	GLYMA.15G140600
LOC100305844	GLYMA.15G142100
LOC102660476	GLYMA.15G145500
LOC100801955	GLYMA.15G157100
LOC100500593	GLYMA.15G161100
LOC100818128	GLYMA.15G161400
LOC100779633	GLYMA.15G163800
LOC100787118	GLYMA.15G1662001
LOC100816002	GLYMA.15G166700
LOC100792945	GLYMA.15G1675001
LOC100780338	GLYMA.15G169200
LOC100804961	GLYMA.15G170400
LOC100806027	GLYMA.15G177000
LOC100794872	GLYMA.15G181500
LOC100816686	GLYMA.15G181600
LOC100796984	GLYMA.15G181900
LOC100796455	GLYMA.15G182000
LOC100527906	GLYMA.15G182800
LOC100820086	GLYMA.15G186500
LOC100779458	GLYMA.15G187000
LOC100788544	GLYMA.15G189300
LOC100796456	GLYMA.15G190800
LOC102660514	GLYMA.15G191500
LOC100793101	GLYMA.15G192100
LOC100807099	GLYMA.15G1927001
LOC100777673	GLYMA.15G195000
LOC100788366	GLYMA.15G197300
LOC100802477	GLYMA.15G197800
LOC100801423	GLYMA.15G198800
LOC100817407	GLYMA.15G202500
LOC102664419	GLYMA.15G205800
LOC100776609	GLYMA.15G206300
LOC100786048	GLYMA.15G208700
LOC100788534	GLYMA.15G211400
LOC100812785	GLYMA.15G212800
LOC100794677	GLYMA.15G213600
LOC100797874	GLYMA.15G215900
LOC100802658	GLYMA.15G219100
LOC100808670	GLYMA.15G219200
WRI1	GLYMA.15G221600
LOC100781053	GLYMA.15G224500
LOC100817593	GLYMA.15G224900
LOC102669872	GLYMA.15G226300
CYSTATIN	GLYMA.15G227500
LOC100801412	GLYMA.15G235900
LOC100806195	GLYMA.15G236400
LOC100807792	GLYMA.15G244100
LOC100799445	GLYMA.15G245800
GST3	GLYMA.15G252200
LOC102665895	GLYMA.15G253400
LOC100795748	GLYMA.15G260000
LOC100800880	GLYMA.15G261800
LOC100817933	GLYMA.15G266300
LOC100815632	GLYMA.15G266500
LOC100781412	GLYMA.15G269900
LOC100796446	GLYMA.15G275400
LOC100794153	GLYMA.15G275500
LOC100796094	GLYMA.15G276100
LOC100798399	GLYMA.15G276400
LOC102663906	GLYMA.16G004800
LOC100804966	GLYMA.16G005600
LOC100798956	GLYMA.16G006100
LOC100789952	GLYMA.16G014400
LOC100789425	GLYMA.16G020000
LOC100804791	GLYMA.16G028100
LOC100787141	GLYMA.16G045900
LOC100795584	GLYMA.16G047800
LOC100800355	GLYMA.16G048900
LOC100817428	GLYMA.16G058000
LOC100793462	GLYMA.16G063200
LOC102666585	GLYMA.16G063400
LOC100813165	GLYMA.16G070900
LOC100805329	GLYMA.16G072700
MYB181	GLYMA.16G073000
LOC100779810	GLYMA.16G076600
LOC100789421	GLYMA.16G081200
LOC100791376	GLYMA.16G082200
LOC100791527	GLYMA.16G082400
LOC102670496	GLYMA.16G083000
LOC100795042	GLYMA.16G083300
LOC100797525	GLYMA.16G084200
LOC100795938	GLYMA.16G090900
LOC100807444	GLYMA.16G091200
LOC100800701	GLYMA.16G091400
LOC100816881	GLYMA.16G094300
LOC100820093	GLYMA.16G095000
LOC100775540	GLYMA.16G095100
LOC100794875	GLYMA.16G100600
LOC100792777	GLYMA.16G101500
LOC100818307	GLYMA.16G103400
LOC100788010	GLYMA.16G103700
LOC100782333	GLYMA.16G106300
LOC100781794	GLYMA.16G106500
LOC100800896	GLYMA.16G107700
LOC100796114	GLYMA.16G108300
LOC100776279	GLYMA.16G110100
LOC102663998	GLYMA.16G110700
LOC100815119	GLYMA.16G116900
LOC100781981	GLYMA.16G132100
LOC100805872	GLYMA.16G140700
LOC100818143	GLYMA.16G144200
LOC100803195	GLYMA.16G166900
LOC102661442	GLYMA.16G170800
LOC102662253	GLYMA.16G171200
LOC100816885	GLYMA.16G173500
LOC100793125	GLYMA.16G174900
LOC100784477	GLYMA.16G178800
LOC100796283	GLYMA.16G182100
LOC102670103	GLYMA.16G185500
LOC100801440	GLYMA.16G189900
LOC100806921	GLYMA.16G210300
LOC100788401	GLYMA.17G001100
LOC100797921	GLYMA.17G005500
LOC100799492	GLYMA.17G006800
CKX3	GLYMA.17G054500
LOC100784507	GLYMA.17G066000
LOC100811230	GLYMA.17G083300
LOC100811912	GLYMA.17G099600
LOC100816047	GLYMA.17G102900
LOC100780025	GLYMA.17G104200
LOC100803384	GLYMA.17G125300
LOC100780928	GLYMA.17G133000
LOC100500257	GLYMA.17G152600
LOC100527923	GLYMA.17G161900
LOC102664901	GLYMA.17G162300
LOC102666361	GLYMA.17G171600
LOC100806962	GLYMA.17G172400
LOC100809640	GLYMA.17G172700
LOC106796650	GLYMA.17G174000
ZEP	GLYMA.17G174500
LOC106796786	GLYMA.17G177000
LOC100797746	GLYMA.17G182700
LOC100814083	GLYMA.17G183400
LOC100803579	GLYMA.17G183700
LOC100808900	GLYMA.17G185100
LOC100818869	GLYMA.17G186800
LOC100819939	GLYMA.17G187500
LOC100817461	GLYMA.17G187900
LOC100775929	GLYMA.17G188300
LOC100811028	GLYMA.17G189500
LOC732580	GLYMA.17G191000
LOC100788049	GLYMA.17G196400
LOC100790179	GLYMA.17G197200
LOC100795797	GLYMA.17G199600
LOC100817089	GLYMA.17G201400
LOC100819218	GLYMA.17G2020001
LOC100527299	GLYMA.17G202100
LOC102670154	GLYMA.17G203600
LOC100499816	GLYMA.17G206800
LOC102664075	GLYMA.17G207300
LOC100808880	GLYMA.17G207700
LOC100809960	GLYMA.17G207900
LOC100816565	GLYMA.17G209600
LOC100817099	GLYMA.17G209900
LOC100818696	GLYMA.17G210800
LOC100786958	GLYMA.17G211100
LOC100779295	GLYMA.17G217200
LOC100805891	GLYMA.17G222000
LOC100790500	GLYMA.17G222200
LOC100809437	GLYMA.17G223000
LOC100305787	GLYMA.17G223400
LOC100811577	GLYMA.17G223600
LOC102664611	GLYMA.17G228700
LOC100817786	GLYMA.17G232000
LOC100819585	GLYMA.17G252700
LOC100782017	GLYMA.18G000100
LOC100805196	GLYMA.18G012900
LOC100790900	GLYMA.18G028900
LOC100788606	GLYMA.18G052000
LOC100790732	GLYMA.18G052500
LOC100794409	GLYMA.18G053200
LOC100794935	GLYMA.18G053300
LOC100795996	GLYMA.18G053400
LOC100796517	GLYMA.18G053500
LOC100811056	GLYMA.18G077300
LOC100775600	GLYMA.18G079000
LOC100777744	GLYMA.18G080600
LOC100778280	GLYMA.18G080700
LOC100816958	GLYMA.18G090600
LOC100776684	GLYMA.18G101600
LOC100815000	GLYMA.18G107900
LOC100778626	GLYMA.18G113100
LOC100810547	GLYMA.18G118100
LOC100816434	GLYMA.18G119400
LOC100818560	GLYMA.18G119500
LOC100796682	GLYMA.18G121000
LOC100808045	GLYMA.18G126000
LOC100815547	GLYMA.18G128900
LOC100306114	GLYMA.18G129800
LOC100306463	GLYMA.18G133800
LOC100780585	GLYMA.18G138300
LOC100787888	GLYMA.18G141900
LOC100788950	GLYMA.18G142900
LOC100818895	GLYMA.18G146600
LOC100795815	GLYMA.18G147800
LOC100794225	GLYMA.18G148100
LOC100814637	GLYMA.18G148700
LOC100811939	GLYMA.18G149800
LOC100778261	GLYMA.18G150200
LOC100777201	GLYMA.18G150300
LOC100805186	GLYMA.18G153100
LOC100809104	GLYMA.18G154700
LOC100500611	GLYMA.18G154900
LOC100500606	GLYMA.18G156300
LOC102663267	GLYMA.18G158000
LOC100781128	GLYMA.18G158100
LOC100783814	GLYMA.18G158900
LOC100788597	GLYMA.18G160500
LOC100795986	GLYMA.18G167300
LOC100814993	GLYMA.18G168900
LOC100819248	GLYMA.18G169600
LOC100815339	GLYMA.18G176000
LOC100814114	GLYMA.18G177500
LOC100792819	GLYMA.18G179800
LOC100813758	GLYMA.18G199800
LOC100780767	GLYMA.18G203900
LOC100785941	GLYMA.18G206100
LOC100811782	GLYMA.18G207500
LOC100037477	GLYMA.18G224500
LOC100819614	GLYMA.18G226500
LOC106797059	GLYMA.18G231200
LOC100797573	GLYMA.18G240200
LOC102669135	GLYMA.18G256800
LOC100786627	GLYMA.18G259600
LOC100794047	GLYMA.18G261400
LOC100793178	GLYMA.18G275500
LOC100808391	GLYMA.18G282600
LOC100818892	GLYMA.18G297900
LOC100816600	GLYMA.18G299200
LOC100785972	GLYMA.19G001500
LOC100816972	GLYMA.19G006500
LOC100791274	GLYMA.19G008500
LOC100791814	GLYMA.19G010200
LOC100798134	GLYMA.19G017200
LOC100819830	GLYMA.19G020900
LOC100797972	GLYMA.19G024000
LOC100795662	GLYMA.19G027900
LOC100810907	GLYMA.19G028500
LOC100806822	GLYMA.19G031600
LOC100820188	GLYMA.19G034600
LOC100799034	GLYMA.19G038400
LOC100811822	GLYMA.19G042500
LOC100800978	GLYMA.19G042900
LOC100805053	GLYMA.19G045200
LOC100780800	GLYMA.19G045700
LOC100811280	GLYMA.19G049500
LOC100801138	GLYMA.19G057200
LOC100793032	GLYMA.19G062000
LOC100799377	GLYMA.19G064500
LOC100775276	GLYMA.19G066800
LOC100802404	GLYMA.19G067100
LOC100814503	GLYMA.19G069800
LOC100813973	GLYMA.19G070000
LOC100795484	GLYMA.19G072900
LOC100806107	GLYMA.19G077300
LOC100791819	GLYMA.19G079100
LOC100811815	GLYMA.19G079600
LOC102663487	GLYMA.19G081700
LOC100819984	GLYMA.19G082800
LOC100778112	GLYMA.19G085300
HEMG	GLYMA.19G087600
LOC102661153	GLYMA.19G089300
LOC102662543	GLYMA.19G091300
LOC100791275	GLYMA.19G091800
LOC100527394	GLYMA.19G093500
LOC100799365	GLYMA.19G094500
LOC100804504	GLYMA.19G096100
LOC100807171	GLYMA.19G097700
LOC100810894	GLYMA.19G099000
LOC100813055	GLYMA.19G100900
LOC100795651	GLYMA.19G103200
LOC100796701	GLYMA.19G103500
LOC106797385	GLYMA.19G104200
LOC100819645	GLYMA.19G104300
LOC106797386	GLYMA.19G105000
LOC100805748	GLYMA.19G106100
LOC100785430	GLYMA.19G116700
LOC100775619	GLYMA.19G120200
LOC100801137	GLYMA.19G121400
LOC100805939	GLYMA.19G124000
LOC100794603	GLYMA.19G126600
LOC100500196	GLYMA.19G129900
LOC100807172	GLYMA.19G130000
LOC100816610	GLYMA.19G131300
LOC100817683	GLYMA.19G133400
LOC100786642	GLYMA.19G137500
LOC100794422	GLYMA.19G139400
LOC100777953	GLYMA.19G153700
LOC100779902	GLYMA.19G154800
LOC100793202	GLYMA.19G159200
LOC100527324	GLYMA.19G163000
LOC100814487	GLYMA.19G170000
LOC102669902	GLYMA.19G186500
LOC100800961	GLYMA.19G186900
LOC100801315	GLYMA.19G204700
LOC100817316	GLYMA.19G214900
LOC100780978	GLYMA.19G221200
LOC100795843	GLYMA.19G228100
LOC100775444	GLYMA.19G241200
LOC102669415	GLYMA.19G244100
LOC100800436	GLYMA.19G258900
LOC100790246	GLYMA.20G011500
LOC100787947	GLYMA.20G021200
LOC100801000	GLYMA.20G021800
LOC100814351	GLYMA.20G025600
LOC100810592	GLYMA.20G027400
LOC100792182	GLYMA.20G031200
LOC102668050	GLYMA.20G031800
LOC100806144	GLYMA.20G034600
LOC102660688	GLYMA.20G036900
LOC100781355	GLYMA.20G041500
LOC100790942	GLYMA.20G043100
LOC100798334	GLYMA.20G044200
LOC100794635	GLYMA.20G044300
LOC100797272	GLYMA.20G045400
LOC102667832	GLYMA.20G047500
LOC100780990	GLYMA.20G054300
LOC100810922	GLYMA.20G054600
LOC100778497	GLYMA.20G055700
LOC100813099	GLYMA.20G056500
LOC100780271	GLYMA.20G056900
LOC100812009	GLYMA.20G057100
LOC102665764	GLYMA.20G057700
LOC100817889	GLYMA.20G058300
LOC100808104	GLYMA.20G060900
LOC100786887	GLYMA.20G065100
LOC100794298	GLYMA.20G066300
LOC100813995	GLYMA.20G069700
LOC100815591	GLYMA.20G069800
LOC100796915	GLYMA.20G070500
LOC100337655	GLYMA.20G071000
LOC102667144	GLYMA.20G071600
LOC100797989	GLYMA.20G072600
LOC100798513	GLYMA.20G073400
LOC100791474	GLYMA.20G075900
LOC102668271	GLYMA.20G078000
LOC100809860	GLYMA.20G078300
LOC100820203	GLYMA.20G082800
LOC100784393	GLYMA.20G086700
LOC100781531	GLYMA.20G102500
LOC100813263	GLYMA.20G109000
LOC100811658	GLYMA.20G114000
LOC100777778	GLYMA.20G135800
LOC100779916	GLYMA.20G136400
LOC100780445	GLYMA.20G136500
LOC100780986	GLYMA.20G136600
LOC100788301	GLYMA.20G172600
LOC100777452	GLYMA.20G182600
LOC100782087	GLYMA.20G184600
LOC100791122	GLYMA.20G186800
LOC100788484	GLYMA.20G202700
LOC100806498	GLYMA.20G224400
LOC100817872	GLYMA.20G227000
LOC100787941	GLYMA.20G233900
LOC100793222	GLYMA.20G236000
LOC100817175	GLYMA.20G250200
MIR1511	gma-MIR1511
MIR1516C	gma-MIR1516c
MIR169H	gma-MIR169h
MIR2119	gma-MIR2119
MIR395M	gma-MIR395m
MIR5766	gma-MIR5766
LOC100799742	#N/A
LOC100814408	#N/A
LOC100790909	#N/A
LOC100779211	#N/A
LOC102662781	#N/A
LOC100786640	#N/A
LOC100781039	#N/A
LOC102664545	#N/A
LOC102666513	#N/A
LOC100790465	#N/A
LOC102661297	#N/A
LOC106799144	#N/A
LOC106797700	#N/A
LOC100775303	#N/A
LOC100788741	#N/A
LOC100783295	#N/A
LOC102661378	#N/A
LOC106796380	#N/A
LOC102666264	#N/A
LOC106799540	#N/A
LOC102667339	#N/A
LOC100792199	#N/A
LOC102668821	#N/A
LOC100785015	#N/A
LOC100796800	#N/A
LOC100815186	#N/A
LOC102660161	#N/A
LOC106797377	#N/A
LOC100803813	#N/A
LOC100778249	#N/A
LOC102662838	#N/A
LOC106796329	#N/A
LOC106796509	#N/A
LOC102661371	#N/A
LOC102662904	#N/A
LOC102664425	#N/A
LOC102666837	#N/A
LOC102661018	#N/A
LOC106796190	#N/A
LOC102660481	#N/A
LOC102666014	#N/A
LOC100815361	#N/A
LOC102667697	#N/A
LOC100806906	#N/A
LOC100792933	#N/A
LOC102665324	#N/A
LOC102669412	#N/A
LOC102667850	#N/A
LOC106797608	#N/A
LOC106798948	#N/A
LOC102670138	#N/A
LOC100781816	#N/A
LOC102670269	#N/A
LOC102669191	#N/A
LOC102660245	#N/A
LOC100783728	#N/A
LOC106795785	#N/A
LOC102660204	#N/A
LOC102667764	#N/A
LOC100780648	#N/A
LOC102666197	#N/A
LOC102669637	#N/A
LOC106795031	#N/A
LOC106798722	#N/A
LOC106797579	#N/A
LOC100810729	#N/A
LOC100780304	#N/A
LOC100806412	#N/A
LOC100819355	#N/A
LOC100803261	#N/A
LOC102670539	#N/A
LOC100527866	#N/A
LOC106799590	#N/A
LOC106797682	#N/A
LOC106794243	#N/A
LOC102666695	#N/A
LOC100779348	#N/A
LOC102667581	#N/A
LOC100777905	#N/A
LOC102667061	#N/A
LOC102663469	#N/A
LOC106795334	#N/A
LOC102664246	#N/A
LOC100816606	#N/A
LOC100788532	#N/A
LOC100802827	#N/A
LOC102661395	#N/A
LOC100778952	#N/A
LOC106798631	#N/A
LOC102661974	#N/A
LOC102665469	#N/A
LOC106795992	#N/A
LOC100813818	#N/A
LOC100790653	#N/A
LOC100806871	#N/A
LOC100788527	#N/A
LOC106797449	#N/A
LOC100783200	#N/A
LOC100775596	#N/A
LOC102669777	#N/A
LOC102667049	#N/A
LOC102670074	#N/A
LOC106797604	#N/A
LOC100806207	#N/A
LOC100788838	#N/A
LOC100819358	#N/A
LOC100787721	#N/A
LOC106794591	#N/A
LOC106795028	#N/A
LOC102661804	#N/A
LOC100816857	#N/A
LOC106796125	#N/A
LOC106796049	#N/A
LOC106796530	#N/A
LOC100804653	#N/A
LOC102663824	#N/A
LOC102666426	#N/A
LOC102660080	#N/A
LOC106797505	#N/A
LOC100792192	#N/A
LOC102664450	#N/A
LOC102661777	#N/A
LOC100802413	#N/A
LOC100813777	#N/A
LOC100784839	#N/A
LOC100788900	#N/A
LOC100793880	#N/A
LOC106795415	#N/A
LOC102668837	#N/A
LOC106796145	#N/A
LOC100776451	#N/A
LOC100803909	#N/A
LOC102662568	#N/A
LOC102667603	#N/A
LOC100820111	#N/A
LOC100795109	#N/A
LOC100778284	#N/A
LOC106796918	#N/A
LOC106797165	#N/A
LOC102662989	#N/A
LOC102669380	#N/A
LOC102662520	#N/A
LOC100783350	#N/A
LOC106798815	#N/A
LOC100810096	#N/A
LOC100776939	#N/A
LOC100814570	#N/A
LOC100816577	#N/A
LOC102661500	#N/A
LOC102669424	#N/A
LOC102662956	#N/A
LOC100786335	#N/A
LOC106796042	#N/A
LOC100806922	#N/A
LOC100808958	#N/A
LOC100811931	#N/A
LOC102668631	#N/A
LOC100500326	#N/A
LOC100780549	#N/A
LOC102659771	#N/A
LOC102668912	#N/A
LOC100784582	#N/A
LOC106795308	#N/A
LOC100789231	#N/A
LOC100779086	#N/A
LOC100800687	#N/A
LOC100785881	#N/A
LOC102662256	#N/A
LOC100789117	#N/A
LOC100795615	#N/A
LOC102668921	#N/A
LOC102666427	#N/A
LOC102666196	#N/A
LOC100813587	#N/A
LOC102670305	#N/A
LOC106797635	#N/A
LOC106797675	#N/A
LOC100786643	#N/A
LOC100811961	#N/A
LOC106798195	#N/A
LOC100816072	#N/A
LOC100793567	#N/A
LOC100815957	#N/A
LOC102663034	#N/A
LOC102663662	#N/A
LOC100784154	#N/A
LOC106794409	#N/A
LOC100781813	#N/A
LOC100803971	#N/A
LOC100785787	#N/A
LOC106795298	#N/A
LOC100781397	#N/A
LOC102667883	#N/A
LOC106797047	#N/A
LOC106797811	#N/A
LOC100808402	#N/A
LOC100799761	#N/A
LOC100789041	#N/A
LOC100777620	#N/A
LOC100798385	#N/A
LOC102665029	#N/A
LOC100785196	#N/A
LOC106799687	#N/A
LOC102660413	#N/A
ANS	#N/A
LOC106794724	#N/A
LOC100795110	#N/A
LOC106794790	#N/A
LOC100780603	#N/A
LOC100792112	#N/A
LOC102669395	#N/A
LOC106795057	#N/A
LOC100799049	#N/A
LOC100801001	#N/A
LOC102669973	#N/A
LOC102661146	#N/A
LOC100789916	#N/A
LOC100813478	#N/A
LOC102660851	#N/A
LOC102668805	#N/A
LOC102667418	#N/A
LOC100776082	#N/A
LOC100796628	#N/A
LOC102662612	#N/A
LOC106796173	#N/A
LOC106796579	#N/A
LOC100814770	#N/A
LOC102663386	#N/A
LOC102663081	#N/A
LOC106796895	#N/A
LOC100787723	#N/A
LOC100780753	#N/A
LOC102665871	#N/A
LOC100794917	#N/A
LOC100790737	#N/A
LOC100809299	#N/A
LOC100815139	#N/A
LOC102665273	#N/A
LOC106798468	#N/A
LOC102659881	#N/A
LOC106798499	#N/A
LOC106798509	#N/A
LOC106798546	#N/A
LOC100784733	#N/A
LOC106798881	#N/A
LOC106798832	#N/A
LOC102669059	#N/A
LOC100797505	#N/A
LOC100803714	#N/A
LOC102669079	#N/A
LOC100305521	#N/A
LOC106794387	#N/A
LOC102669293	#N/A
LOC102668621	#N/A
LOC106794597	#N/A
LOC100801961	#N/A
LOC106794318	#N/A
LOC106794765	#N/A
LOC102660614	#N/A
LOC106795039	#N/A
LOC100784038	#N/A
LOC102659803	#N/A
LOC100776387	#N/A
LOC100781064	#N/A
LOC100785179	#N/A
LOC102666707	#N/A
LOC106796974	#N/A
LOC102669593	#N/A
LOC102667844	#N/A
LOC106799031	#N/A
LOC102666832	#N/A
LOC100806893	#N/A
LOC100817935	#N/A
LOC100818282	#N/A
LOC100775214	#N/A
LOC102665903	#N/A
LOC106799472	#N/A
LOC100775198	#N/A
LOC106798572	#N/A
LOC102664439	#N/A
LOC102661497	#N/A
LOC102663569	#N/A
LOC100804603	#N/A
LOC100789668	#N/A
LOC106795282	#N/A
LOC102659734	#N/A
LOC100819553	#N/A
LOC106796264	#N/A
LOC100782133	#N/A
LOC102668464	#N/A
LOC106796414	#N/A
LOC106794143	#N/A
LOC100776820	#N/A
LOC102668728	#N/A
LOC102670550	#N/A
LOC100791260	#N/A
LOC102662898	#N/A
LOC106796925	#N/A
LOC106797168	#N/A
LOC100801520	#N/A
LOC100793537	#N/A
LOC102666160	#N/A
LOC100806503	#N/A
LOC100802076	#N/A
LOC100305525	#N/A
LOC106798247	#N/A
LOC106798614	#N/A
LOC102666862	#N/A
LOC100819781	#N/A
LOC100805042	#N/A
LOC102661127	#N/A
LOC100812363	#N/A
LOC100780132	#N/A
LOC102661757	#N/A
LOC102667607	#N/A
LOC102662574	#N/A
LOC100817359	#N/A
LOC100782289	#N/A
LOC106799231	#N/A
LOC102665799	#N/A
LOC102661768	#N/A
LOC106799246	#N/A
LOC100814750	#N/A
LOC102668176	#N/A
LOC100789066	#N/A
LOC102665320	#N/A
LOC102663949	#N/A
TRNAL-UAA	#N/A
LOC102663950	#N/A
LOC106799630	#N/A
LOC106794384	#N/A
PPC16	#N/A
LOC100820197	#N/A
LOC102667426	#N/A
LOC102666578	#N/A
LOC106796172	#N/A
LOC102666961	#N/A
LOC100810638	#N/A
LOC102669080	#N/A
LOC106796337	#N/A
LOC102665790	#N/A
LOC102662628	#N/A
LOC106797885	#N/A
LOC102664149	#N/A
LOC106797805	#N/A
LOC100819640	#N/A
LOC100801483	#N/A
LOC100815207	#N/A
LOC106798858	#N/A
LOC100808453	#N/A
LOC102669839	#N/A
LOC100810639	#N/A
LOC102668259	#N/A
LOC106799282	#N/A
LOC106799580	#N/A
LOC100785913	#N/A
LOC102663195	#N/A
LOC106796526	#N/A
LOC102665460	#N/A
LOC106794816	#N/A
LOC106794833	#N/A
LOC102661499	#N/A
LOC100802324	#N/A
LOC106794735	#N/A
LOC106794967	#N/A
LOC106794785	#N/A
LOC106794249	#N/A
LOC100815346	#N/A
LOC102662088	#N/A
LOC102662340	#N/A
LOC102662565	#N/A
LOC100783678	#N/A
LOC100787761	#N/A
LOC106795600	#N/A
LOC102666940	#N/A
LOC102664657	#N/A
LOC100787613	#N/A
LOC106795498	#N/A
LOC100809380	#N/A
LOC106795853	#N/A
LOC100785324	#N/A
LOC106796228	#N/A
LOC100781239	#N/A
LOC100800341	#N/A
LOC106796257	#N/A
LOC100806726	#N/A
LOC100782158	#N/A
LOC106796404	#N/A
LOC106796405	#N/A
LOC100775735	#N/A
LOC106796480	#N/A
LOC100794732	#N/A
LOC100787161	#N/A
LOC102667851	#N/A
LOC106796670	#N/A
LOC100803046	#N/A
LOC100783777	#N/A
LOC106796879	#N/A
LOC102669496	#N/A
LOC106797033	#N/A
LOC100788071	#N/A
LOC102664540	#N/A
LOC102669189	#N/A
LOC102666111	#N/A
LOC100799037	#N/A
LOC100781509	#N/A
LOC100814977	#N/A
LOC100818191	#N/A
LOC100781824	#N/A
LOC100786971	#N/A
LOC100804104	#N/A
LOC102666569	#N/A
LOC100819492	#N/A
LOC102664363	#N/A
LOC102662780	#N/A
LOC102669866	#N/A
LOC106797603	#N/A
LOC106797717	#N/A
LOC100791950	#N/A
LOC100804318	#N/A
LOC100816270	#N/A
LOC102659788	#N/A
LOC106798507	#N/A
LOC102663910	#N/A
LOC100781157	#N/A
LOC102665114	#N/A
LOC100792333	#N/A
LOC100819687	#N/A
LOC106798878	#N/A
LOC100787438	#N/A
LOC106798747	#N/A
LOC100796422	#N/A
LOC100780510	#N/A
LOC106799336	#N/A
LOC102659357	#N/A
LOC100801751	#N/A
LOC100792238	#N/A
LOC106799658	#N/A
LOC100778038	#N/A
LOC100814225	#N/A
LOC100797394	#N/A
LOC100810478	#N/A
LOC102663158	#N/A
LOC106794786	#N/A
LOC102670541	#N/A
LOC106795054	#N/A
LOC100790577	#N/A
LOC106795250	#N/A
LOC102666983	#N/A
LOC100777484	#N/A
LOC102659383	#N/A
LOC102666443	#N/A
LOC102666363	#N/A
LOC102665580	#N/A
LOC100792791	#N/A
LOC102666980	#N/A
LOC100814502	#N/A
LOC106797236	#N/A
LOC100807027	#N/A
LOC106798179	#N/A
LOC102665420	#N/A
LOC102670318	#N/A
LOC106798116	#N/A
LOC102668509	#N/A
LOC100793381	#N/A
LOC100810073	#N/A
LOC102663167	#N/A
LOC102660155	#N/A
LOC100792183	#N/A
LOC102667313	#N/A
LOC102660757	#N/A
LOC102666604	#N/A
LOC100101912	#N/A
LOC106794399	#N/A
LOC106794587	#N/A
LOC100794545	#N/A
LOC100782274	#N/A
LOC106797064	#N/A
LOC102662350	#N/A
LOC100816195	#N/A
LOC100800551	#N/A
LOC106794592	#N/A
LOC102668117	#N/A
LOC106798388	#N/A
LOC100790148	#N/A
LOC100802023	#N/A
LOC106794820	#N/A
LOC102665731	#N/A
LOC100806113	#N/A
LOC100801542	#N/A
LOC100785097	#N/A
LOC102660708	#N/A
LOC100819681	#N/A
LOC547544	#N/A
LOC102661422	#N/A
LOC100807233	#N/A
LOC100779779	#N/A
LOC100787639	#N/A
LOC102663805	#N/A
LOC102664716	#N/A
LOC106795808	#N/A
PHT1-12	#N/A
LOC106794225	#N/A
LOC102668275	#N/A
LOC100804072	#N/A
LOC106796210	#N/A
LOC100788005	#N/A
LOC100792054	#N/A
LOC102659698	#N/A
LOC102667874	#N/A
LOC100786392	#N/A
LOC106796419	#N/A
LOC102669346	#N/A
LOC102663782	#N/A
LOC100816566	#N/A
LOC100807503	#N/A
LOC106796793	#N/A
LOC102664132	#N/A
LOC102666430	#N/A
LOC102664484	#N/A
LOC100791098	#N/A
LOC100809462	#N/A
LOC106797489	#N/A
LOC106797498	#N/A
LOC106797533	#N/A
LOC100809438	#N/A
LOC106797735	#N/A
LOC106797597	#N/A
LOC102661695	#N/A
LOC106797625	#N/A
LOC102664832	#N/A
LOC100794950	#N/A
LOC106798061	#N/A
LOC102665025	#N/A
LOC106798487	#N/A
LOC106798634	#N/A
LOC106798545	#N/A
LOC100800607	#N/A
LOC102666787	#N/A
LOC102667513	#N/A
LOC102661659	#N/A
LOC100779061	#N/A
LOC102669931	#N/A
LOC100776056	#N/A
LOC102661533	#N/A
LOC102660704	#N/A
LOC106798991	#N/A
LOC106799327	#N/A
LOC102669940	#N/A
LOC100817792	#N/A
LOC100807644	#N/A
LOC100780548	#N/A
LOC100807285	#N/A
LOC106795099	#N/A
LOC106795305	#N/A
LOC100807348	#N/A
LOC102663779	#N/A
LOC106798628	#N/A
LOC100793105	#N/A
LOC102661051	#N/A
LOC100819273	#N/A
LOC100781318	#N/A
LOC102668347	#N/A
LOC100814353	#N/A
LOC106797268	#N/A
LOC102666227	#N/A
LOC102663030	#N/A
LOC106794163	#N/A
LOC100780696	#N/A
LOC100819049	#N/A
LOC106799711	#N/A
LOC102662560	#N/A
LOC100803923	#N/A
LOC102666619	#N/A
LOC106797646	#N/A
LOC106799293	#N/A
LOC100792124	#N/A
LOC106799230	#N/A
LOC106795296	#N/A
LOC102659841	#N/A
LOC100781144	#N/A
LOC106795816	#N/A
LOC106796109	#N/A
LOC100785225	#N/A
LOC100789528	#N/A
LOC100806242	#N/A
LOC100779798	#N/A
LOC100781664	#N/A
