# Supplementary material for: Dynamic Changes in Genome-Wide Histone3 Lysine27 Trimethylation and Gene Expression of Soybean Roots in Response to Salt Stress
Source: Front Plant Sci. 2019 Sep 10;10:1031. doi: 10.3389/fpls.2019.01031 (PMC6746917; doi:10.3389/fpls.2019.01031)
Supplement: Supplementary file 3 [file Table_3.xlsx]

## Sheet: Sheet1
Supplementary Table 6. The list of genes with de novo H3K27me3 modification in salt-treated soybean plants.
Symbol	Aliases
LOC100810153	GLYMA.01G002200
LOC100777884	GLYMA.01G019600
LOC102665040	GLYMA.01G022700
LOC100794723	GLYMA.01G042100
LOC102663132	GLYMA.01G062500
LOC100817085	GLYMA.01G085700
LOC102662220	GLYMA.01G102200
LOC100792259	GLYMA.01G108400
LOC100806935	GLYMA.01G127100
LOC100814594	GLYMA.01G165100
LOC100805147	GLYMA.01G1894002
LOC100785933	GLYMA.02G007500
LOC100816578	GLYMA.02G010300
LOC102667624	GLYMA.02G0226001
LOC100799512	GLYMA.02G077500
LOC100789116	GLYMA.02G094800
LOC100805183	GLYMA.02G114500
LOC100804120	GLYMA.02G114600
LOC100801814	GLYMA.02G116300
LOC100818722	GLYMA.02G141300
SBP2	GLYMA.02G145700
LOC100782193	GLYMA.02G164100
LOC102659565	GLYMA.02G169400
LOC102667287	GLYMA.02G172500
LOC100800927	GLYMA.02G190600
LOC100804635	GLYMA.02G209800
LOC100812660	GLYMA.02G212400
LOC100814623	GLYMA.02G216100
LOC100790173	GLYMA.02G220900
LOC100800202	GLYMA.02G247400
LOC100804823	GLYMA.02G248000
LOC100527563	GLYMA.02G265100
LOC100778442	GLYMA.02G271500
LOC100797016	GLYMA.02G289700
LOC100793702	GLYMA.02G305400
LOC100783621	GLYMA.02G306900
LOC100818372	GLYMA.03G016600
LOC100780425	GLYMA.03G057800
LOC100811273	GLYMA.03G062200
LOC100527900	GLYMA.03G068900
LOC100795122	GLYMA.03G078600
LOC100778093	GLYMA.03G096600
LOC102664199	GLYMA.03G103100
LOC100789319	GLYMA.03G109400
LOC100801669	GLYMA.03G114800
LOC100819973	GLYMA.03G125400
LOC100804670	GLYMA.03G156700
LOC100811619	GLYMA.03G159200
LOC100775603	GLYMA.03G163100
LOC102665987	GLYMA.03G168500
LOC100793890	GLYMA.03G169800
LOC100812151	GLYMA.03G175200
LOC100816234	GLYMA.03G183000
LOC100789847	GLYMA.03G214400
LOC100802211	GLYMA.03G249600
LOC100793031	GLYMA.04G015100
LOC100798133	GLYMA.04G049500
LOC100816255	GLYMA.04G054000
LOC100804523	GLYMA.04G077200
LOC100801525	GLYMA.04G093900
LOC102666249	GLYMA.04G110100
LOC100794923	GLYMA.04G143000
LOC100795335	GLYMA.04G149400
LOC100804891	GLYMA.04G150300
LOC100800438	GLYMA.04G154100
LOC102669082	GLYMA.04G173400
LOC100777775	GLYMA.04G177000
LOC100798682	GLYMA.04G201000
LOC100791639	GLYMA.04G217300
LOC100780633	GLYMA.04G239800
LOC100499993	GLYMA.05G016600
LOC100793420	GLYMA.05G028700
LOC100781909	GLYMA.05G042600
LOC100785827	GLYMA.05G065900
LOC100802253	GLYMA.05G069800
LOC100791995	GLYMA.05G083000
LOC102661895	GLYMA.05G083400
LOC100784778	GLYMA.05G098600
BZIP9	GLYMA.05G122400
LOC100781731	GLYMA.05G125600
LOC100796559	GLYMA.05G132300
LOC100796569	GLYMA.05G146600
LOC100790939	GLYMA.05G201500
LOC100787235	GLYMA.05G202600
LOC100794638	GLYMA.05G240000
ODC2	GLYMA.06G020300
LOC100796244	GLYMA.06G024600
LOC100795892	GLYMA.06G042900
LOC100794488	GLYMA.06G044100
LOC100801015	GLYMA.06G047400
LOC100801926	GLYMA.06G047900
LOC100810956	GLYMA.06G073900
LOC100792205	GLYMA.06G084200
LOC100817207	GLYMA.06G085000
LOC100786187	GLYMA.06G114900
LOC100786198	GLYMA.06G142100
LOC100782456	GLYMA.06G143500
LOC100805095	GLYMA.06G149800
LOC100814733	GLYMA.06G176300
LOC100800656	GLYMA.06G195200
LOC102667777	GLYMA.06G199700
LOC100807219	GLYMA.06G225400
LOC100818974	GLYMA.06G228700
LOC100775674	GLYMA.06G230600
LOC100801189	GLYMA.06G245300
LOC100817558	GLYMA.06G256700
LOC100802962	GLYMA.06G261100
LOC100814717	GLYMA.06G263500
LOC100801924	GLYMA.06G290000
LOC100778189	GLYMA.07G004600
LOC100800869	GLYMA.07G016100
LOC100306313	GLYMA.07G031300
LOC100806024	GLYMA.07G038400
LOC100810803	GLYMA.07G042100
LOC100794666	GLYMA.07G069800
LOC100815452	GLYMA.07G078300
LOC100775891	GLYMA.07G087000
LOC100786564	GLYMA.07G091900
LOC100803700	GLYMA.07G092700
LOC100818466	GLYMA.07G102700
LOC100783209	GLYMA.07G107300
LOC100811704	GLYMA.07G110600
LOC100818118	GLYMA.07G111000
LOC100796438	GLYMA.07G118600
LOC100807254	GLYMA.07G133000
LOC100780872	GLYMA.07G138400
LOC102664139	GLYMA.07G146600
LOC100306071	GLYMA.07G165000
LOC100794668	GLYMA.07G183100
LOC100815993	GLYMA.07G192700
LOC100810104	GLYMA.07G214800
LOC100791509	GLYMA.07G220400
LOC100786724	GLYMA.07G221100
LOC100818113	GLYMA.07G228300
LOC100790980	GLYMA.07G250600
LOC102665371	GLYMA.08G000500
LOC102660809	GLYMA.08G022200
LOC100807459	GLYMA.08G059000
LOC100801956	GLYMA.08G059800
LOC100793109	GLYMA.08G076700
LOC102665718	GLYMA.08G083900
LOC100305995	GLYMA.08G091800
LOC102664445	GLYMA.08G101700
LOC100809608	GLYMA.08G101900
J1	GLYMA.08G109700
LOC100790663	GLYMA.08G162000
LOC100527791	GLYMA.08G166600
LOC100804782	GLYMA.08G203100
LOC100786568	GLYMA.08G226400
LOC100820078	GLYMA.08G238200
LOC100794168	GLYMA.08G253900
LOC100787998	GLYMA.08G266700
LOC100527150	GLYMA.08G279700
LOC100797344	GLYMA.08G280000
LOC100789599	GLYMA.08G294500
LOC100797517	GLYMA.08G296500
LOC100788193	GLYMA.08G2968001
LOC100306222	GLYMA.08G297300
LOC100799631	GLYMA.08G303800
LOC100814584	GLYMA.08G365700
LOC100787334	GLYMA.09G002300
LOC102670490	GLYMA.09G004600
LOC102666571	GLYMA.09G020600
LOC100786608	GLYMA.09G021100
LOC100794552	GLYMA.09G025800
LOC100780900	GLYMA.09G030100
LOC100808694	GLYMA.09G035900
LOC100806574	GLYMA.09G041000
LOC100526905	GLYMA.09G084600
LOC100794024	GLYMA.09G103600
LOC100815508	GLYMA.09G133200
LOC100500457	GLYMA.09G139200
LOC100800185	GLYMA.09G152400
LOC100794895	GLYMA.09G168400
LOC100795427	GLYMA.09G168600
LOC100813898	GLYMA.09G171000
LOC100808360	GLYMA.09G174400
LOC100810687	GLYMA.09G185900
LOC102659381	GLYMA.09G196500
LOC100775921	GLYMA.09G211700
LOC100813189	GLYMA.09G230300
LOC100778957	GLYMA.09G234900
LOC100816717	GLYMA.09G276100
LOC100527466	GLYMA.09G278100
LOC100783616	GLYMA.09G283400
LOC100799347	GLYMA.10G000200
LOC100527111	GLYMA.10G005800
LOC100814827	GLYMA.10G007200
LOC100527907	GLYMA.10G016600
LOC100810879	GLYMA.10G047200
LOC100800932	GLYMA.10G070500
LOC100783827	GLYMA.10G089000
LOC100805392	GLYMA.10G092400
LOC100810327	GLYMA.10G099900
LOC100775957	GLYMA.10G113600
LOC102661354	GLYMA.10G114300
LOC100817279	GLYMA.10G128300
LOC100306230	GLYMA.10G130200
LOC100775225	GLYMA.10G137000
LOC100817280	GLYMA.10G154100
LOC100790884	GLYMA.10G203300
LOC100799331	GLYMA.10G209500
LOC100803587	GLYMA.10G210900
LOC100306580	GLYMA.10G224100
LOC100781665	GLYMA.10G226200
LOC100789471	GLYMA.10G253200
LOC100787540	GLYMA.10G295100
LOC100790542	GLYMA.10G295800
LOC100527882	GLYMA.11G017400
LOC100792680	GLYMA.11G025100
LOC100779370	GLYMA.11G030600
LOC100809292	GLYMA.11G094300
LOC100787200	GLYMA.11G101800
LOC100800239	GLYMA.11G119000
LOC100801683	GLYMA.11G119700
LOC100793738	GLYMA.11G148000
LOC100805591	GLYMA.11G1745002
LOC100812162	GLYMA.11G192300
LOC100804673	GLYMA.11G201900
LOC100815179	GLYMA.11G204800
LOC100779901	GLYMA.11G224900
LOC100816254	GLYMA.11G235300
LOC100818214	GLYMA.11G235600
LOC100814128	GLYMA.11G236800
LOC100775448	GLYMA.11G243900
LOC100782583	GLYMA.11G254100
LOC100819143	GLYMA.12G049000
LOC100781528	GLYMA.12G080100
LOC100792508	GLYMA.12G106600
LOC100818606	GLYMA.12G131500
LOC100797647	GLYMA.12G153600
LOC100802405	GLYMA.12G164300
LOC100817867	GLYMA.12G170000
LOC100778323	GLYMA.12G235500
LOC102662907	GLYMA.13G003600
LOC100779407	GLYMA.13G028500
LOC100817205	GLYMA.13G038500
LOC100809190	GLYMA.13G039800
LOC100813462	GLYMA.13G043800
LOC100777825	GLYMA.13G053100
LOC100801925	GLYMA.13G059300
LOC102665456	GLYMA.13G067300
LOC100812755	GLYMA.13G102300
KASII-B	GLYMA.13G112700
LOC102669681	GLYMA.13G114400
LOC102665682	GLYMA.13G188700
LOC100803676	GLYMA.13G206500
LOC100807752	GLYMA.13G256100
LOC100786534	GLYMA.13G264100
LOC100788854	GLYMA.13G264300
LOC100816135	GLYMA.13G279800
LOC100814909	GLYMA.13G325800
LOC100792007	GLYMA.13G336900
LOC100786539	GLYMA.13G350600
LOC100783355	GLYMA.13G355200
LOC100784419	GLYMA.13G355700
CYP701A16	GLYMA.13G371400
LOC100815259	GLYMA.14G012000
LOC100820589	GLYMA.14G013800
LOC100775690	GLYMA.14G014500
LOC106795727	GLYMA.14G045700
LOC100779616	GLYMA.14G061800
LOC100789759	GLYMA.14G067400
LOC100816326	GLYMA.14G079500
LOC100776596	GLYMA.14G093400
LOC100783557	GLYMA.14G095900
LOC100780504	GLYMA.14G106400
LOC100790116	GLYMA.14G108100
LOC102662734	GLYMA.14G113000
LOC102660725	GLYMA.14G119000
LOC100814921	GLYMA.14G148300
LOC102665554	GLYMA.14G168900
LOC100793276	GLYMA.14G176700
LOC100812594	GLYMA.14G191400
LOC100809019	GLYMA.14G210000
LOC100817574	GLYMA.14G213600
LOC100786548	GLYMA.14G220800
LOC100776791	GLYMA.15G024600
LOC100801773	GLYMA.15G042400
LOC100806023	GLYMA.15G059400
LOC100816865	GLYMA.15G080900
LOC100817763	GLYMA.15G099000
LOC100777670	GLYMA.15G100900
LOC100781065	GLYMA.15G101800
LOC100785890	GLYMA.15G104600
LOC100791357	GLYMA.15G106200
LOC100305921	GLYMA.15G141900
LOC100789410	GLYMA.15G156100
LOC100819737	GLYMA.15G161600
LOC100786735	GLYMA.15G171800
LOC100819730	GLYMA.15G182600
LOC100800503	GLYMA.15G211200
LOC100816529	GLYMA.15G223800
LOC100820436	GLYMA.15G251100
LOC100787816	GLYMA.15G256800
LOC100797328	GLYMA.15G260600
LOC100806200	GLYMA.15G263400
LOC100796974	GLYMA.15G276000
LOC100806038	GLYMA.16G006000
LOC100787301	GLYMA.16G008400
LOC100526937	GLYMA.16G080800
LOC100793997	GLYMA.16G082600
DXR2	GLYMA.16G089000
LOC100804783	GLYMA.16G096600
LOC100797168	GLYMA.16G108200
LOC102659660	GLYMA.16G108800
LOC100799299	GLYMA.16G124200
LOC100806748	GLYMA.16G126400
LOC100805860	GLYMA.16G147300
LOC100788738	GLYMA.16G151300
LOC102666031	GLYMA.16G174700
LOC100776808	GLYMA.16G216300
LOC100791224	GLYMA.17G022500
LOC100817269	GLYMA.17G038300
LOC100782546	GLYMA.17G042100
LOC100801998	GLYMA.17G049900
LOC100819597	GLYMA.17G086900
LOC100170719	GLYMA.17G101500
LOC100800373	GLYMA.17G110100
LOC100817629	GLYMA.17G129300
LOC100810175	GLYMA.17G172800
LOC100812308	GLYMA.17G173100
LOC100306697	GLYMA.17G177300
LOC106796618	GLYMA.17G178300
LOC102666755	GLYMA.17G198000
LOC100814975	GLYMA.17G209300
LOC100810494	GLYMA.17G229500
LOC100781823	GLYMA.17G230100
LOC100797030	GLYMA.18G008100
LOC100817831	GLYMA.18G019000
LOC100781856	GLYMA.18G023900
LOC102660397	GLYMA.18G033700
LOC100815895	GLYMA.18G043500
LOC100789832	GLYMA.18G095900
LOC100792467	GLYMA.18G096900
LOC100803433	GLYMA.18G097800
LOC100813582	GLYMA.18G100300
LOC100780414	GLYMA.18G102900
LOC102661574	GLYMA.18G107200
LOC100813410	GLYMA.18G109100
LOC100791235	GLYMA.18G137800
LOC100779518	GLYMA.18G138000
LOC100792817	GLYMA.18G164300
LOC100775781	GLYMA.18G182000
LOC100500199	GLYMA.18G189800
LOC100817287	GLYMA.18G251600
LOC100776334	GLYMA.18G254800
LOC100802369	GLYMA.18G264800
GMFT1B	GLYMA.18G299000
LOC100782239	GLYMA.19G021600
LOC100306270	GLYMA.19G025000
LOC100818044	GLYMA.19G074300
LOC100816461	GLYMA.19G083200
LOC102661685	GLYMA.19G101700
LOC100792482	GLYMA.19G102100
LOC100797789	GLYMA.19G160900
LOC100499790	GLYMA.19G180500
LOC100784899	GLYMA.19G197700
LOC102659557	GLYMA.19G224700
LOC100784737	GLYMA.19G237800
LOC100813960	GLYMA.19G238200
LOC100787925	GLYMA.19G240500
LOC100801868	GLYMA.19G243500
LOC100819292	GLYMA.19G250000
LOC100797794	GLYMA.19G258000
LOC100787754	GLYMA.20G000200
LOC100785824	GLYMA.20G012500
LOC100807375	GLYMA.20G023300
LOC100787602	GLYMA.20G040700
LOC100791997	GLYMA.20G043400
LOC106794093	GLYMA.20G054000
LOC100816277	GLYMA.20G099200
LOC100816992	GLYMA.20G153400
LOC100818935	GLYMA.20G154200
LOC100786161	GLYMA.20G171900
LOC100813987	GLYMA.20G194100
LOC100782089	GLYMA.20G199300
LOC100813806	GLYMA.20G200400
LOC100527063	GLYMA.20G233100
MIR1507A	gma-MIR1507a
MIR159D	gma-MIR159d
LOC106798334	#N/A
LOC106795180	#N/A
LOC100779970	#N/A
LOC106795915	#N/A
LOC100798653	#N/A
TRNAL-AAG	#N/A
LOC100776598	#N/A
LOC102659650	#N/A
LOC102664164	#N/A
LOC102662614	#N/A
LOC102664980	#N/A
LOC100803604	#N/A
LOC100778256	#N/A
LOC100798316	#N/A
LOC100127421	#N/A
LOC102660734	#N/A
LOC102667797	#N/A
LOC102662812	#N/A
LOC106797331	#N/A
LOC102667425	#N/A
LOC100791937	#N/A
LOC100792719	#N/A
LOC102665466	#N/A
LOC102668004	#N/A
LOC100782316	#N/A
LOC102666347	#N/A
LOC100785146	#N/A
LOC100794062	#N/A
LOC100812312	#N/A
LOC100804899	#N/A
LOC106799565	#N/A
LOC100783745	#N/A
LOC102669598	#N/A
LOC106796676	#N/A
LOC102661899	#N/A
LOC106799114	#N/A
LOC106795206	#N/A
LOC102663755	#N/A
LOC102668099	#N/A
LOC100794906	#N/A
LOC100820001	#N/A
LOC100812195	#N/A
LOC106795366	#N/A
LOC102665287	#N/A
LOC106796735	#N/A
LOC106796908	#N/A
LOC100775268	#N/A
LOC106798618	#N/A
LOC100780499	#N/A
LOC102664256	#N/A
LOC100777896	#N/A
LOC106797666	#N/A
LOC106798289	#N/A
LOC106798243	#N/A
LOC100818005	#N/A
LOC100791883	#N/A
LOC100808369	#N/A
LOC100795284	#N/A
LOC100800257	#N/A
LOC102661154	#N/A
LOC102669091	#N/A
LOC100819450	#N/A
LOC102663042	#N/A
LOC106797607	#N/A
LOC106797578	#N/A
LOC100799907	#N/A
LOC100815275	#N/A
LOC102667332	#N/A
LOC100796567	#N/A
LOC106795875	#N/A
LOC100816974	#N/A
LOC106798215	#N/A
LOC100802181	#N/A
LOC100784659	#N/A
LOC102667360	#N/A
LOC102661823	#N/A
LOC100816339	#N/A
LOC102664505	#N/A
LOC102660232	#N/A
LOC100794178	#N/A
LOC102668487	#N/A
LOC102668617	#N/A
LOC102667311	#N/A
LOC106799274	#N/A
LOC100792429	#N/A
LOC100786083	#N/A
LOC100813705	#N/A
LOC102666023	#N/A
LOC100816899	#N/A
LOC100811775	#N/A
LOC102663925	#N/A
LOC100788650	#N/A
LOC106799094	#N/A
LOC102665846	#N/A
LOC106798067	#N/A
LOC106795295	#N/A
LOC102666718	#N/A
LOC102669800	#N/A
LOC106796674	#N/A
LOC100789190	#N/A
LOC106798578	#N/A
LOC100798886	#N/A
LOC102668779	#N/A
LOC100817533	#N/A
LOC100801629	#N/A
LOC102668366	#N/A
LOC100500091	#N/A
LOC100777470	#N/A
LOC102660136	#N/A
LOC106796505	#N/A
LOC106796372	#N/A
LOC102667483	#N/A
LOC100804675	#N/A
LOC102661686	#N/A
LOC106797594	#N/A
LOC102665113	#N/A
LOC100807384	#N/A
LOC106799043	#N/A
LOC100820427	#N/A
LOC100811194	#N/A
LOC106799306	#N/A
LOC106794748	#N/A
LOC106794802	#N/A
LOC106794984	#N/A
LOC106794862	#N/A
LOC102665786	#N/A
LOC106796862	#N/A
LOC100785929	#N/A
LOC102662994	#N/A
LOC106797014	#N/A
LOC100786281	#N/A
LOC100780941	#N/A
LOC100777718	#N/A
LOC106794193	#N/A
LOC102664787	#N/A
LOC100802792	#N/A
LOC100796392	#N/A
LOC100782452	#N/A
LOC102670000	#N/A
LOC102662796	#N/A
LOC106795266	#N/A
LOC100783021	#N/A
LOC106796067	#N/A
LOC102662061	#N/A
LOC100818367	#N/A
LOC102669321	#N/A
LOC100793514	#N/A
LOC106797411	#N/A
LOC106797341	#N/A
LOC100787204	#N/A
LOC102664913	#N/A
LOC106797733	#N/A
LOC102664500	#N/A
LOC106797736	#N/A
LOC102661301	#N/A
LOC102669037	#N/A
LOC102666399	#N/A
LOC102660865	#N/A
LOC100782438	#N/A
LOC102668086	#N/A
LOC102659971	#N/A
LOC100781640	#N/A
LOC102664225	#N/A
LOC106799806	#N/A
LOC102669367	#N/A
LOC100818369	#N/A
LOC100795283	#N/A
LOC106795027	#N/A
LOC100817331	#N/A
LOC100781878	#N/A
LOC106795397	#N/A
LOC100305781	#N/A
LOC106795599	#N/A
LOC100820424	#N/A
LOC102664114	#N/A
LOC100784994	#N/A
LOC106796186	#N/A
LOC102661701	#N/A
LOC106796196	#N/A
LOC100795414	#N/A
LOC100820102	#N/A
LOC106796408	#N/A
LOC100808356	#N/A
LOC102670385	#N/A
LOC100779156	#N/A
LOC100793389	#N/A
LOC102659464	#N/A
LOC100783156	#N/A
LOC102665562	#N/A
LOC102669477	#N/A
LOC106798834	#N/A
LOC100793047	#N/A
LOC100790954	#N/A
LOC102660075	#N/A
LOC102668306	#N/A
LOC102670266	#N/A
LOC106799659	#N/A
LOC102664159	#N/A
LOC106794642	#N/A
LOC100796887	#N/A
LOC100807904	#N/A
LOC102668530	#N/A
LOC106795673	#N/A
LOC106795622	#N/A
LOC102665139	#N/A
LOC100788543	#N/A
LOC106796240	#N/A
LOC102659436	#N/A
LOC102667080	#N/A
LOC100776985	#N/A
LOC102668149	#N/A
LOC102663474	#N/A
LOC100782373	#N/A
LOC100800756	#N/A
LOC102661944	#N/A
LOC106797186	#N/A
LOC106797116	#N/A
LOC100819407	#N/A
LOC100815665	#N/A
LOC100795841	#N/A
LOC102663330	#N/A
LOC102660899	#N/A
LOC102661576	#N/A
LOC102662491	#N/A
LOC102665132	#N/A
LOC100814707	#N/A
LOC106794354	#N/A
LOC102659521	#N/A
LOC100797361	#N/A
LOC102669670	#N/A
LOC100785564	#N/A
LOC102663658	#N/A
LOC100805339	#N/A
LOC100813351	#N/A
LOC106794900	#N/A
LOC100803405	#N/A
LOC106794920	#N/A
LOC106795176	#N/A
LOC102666413	#N/A
LOC102661314	#N/A
LOC102666505	#N/A
LOC102670168	#N/A
LOC100776962	#N/A
LOC100779089	#N/A
LOC102666124	#N/A
LOC100775582	#N/A
LOC106796790	#N/A
LOC100778810	#N/A
LOC102670436	#N/A
LOC102668003	#N/A
LOC100779011	#N/A
LOC102666469	#N/A
LOC100786099	#N/A
LOC100790940	#N/A
LOC102661171	#N/A
LOC106798032	#N/A
LOC100819433	#N/A
LOC102666586	#N/A
LOC100807551	#N/A
LOC106798793	#N/A
LOC100815949	#N/A
LOC100788847	#N/A
LOC100797478	#N/A
LOC100779949	#N/A
LOC102661418	#N/A
LOC102661048	#N/A
LOC100815299	#N/A
LOC100798937	#N/A
LOC102668983	#N/A
LOC102661827	#N/A
